# Supplementary material for: NFκB and NLRP3/NLRC4 inflammasomes regulate differentiation, activation and functional properties of monocytes in response to distinct SARS-CoV-2 proteins
Source: PubMed Central journal article supplement (PMC10920883; doi:10.1038/s41467-024-46322-8), 2024-03-07
Supplement: 41467_2024_46322_MOESM1_ESM.pdf [file 41467_2024_46322_MOESM1_ESM.pdf]

# Supplemental Figure 1

A

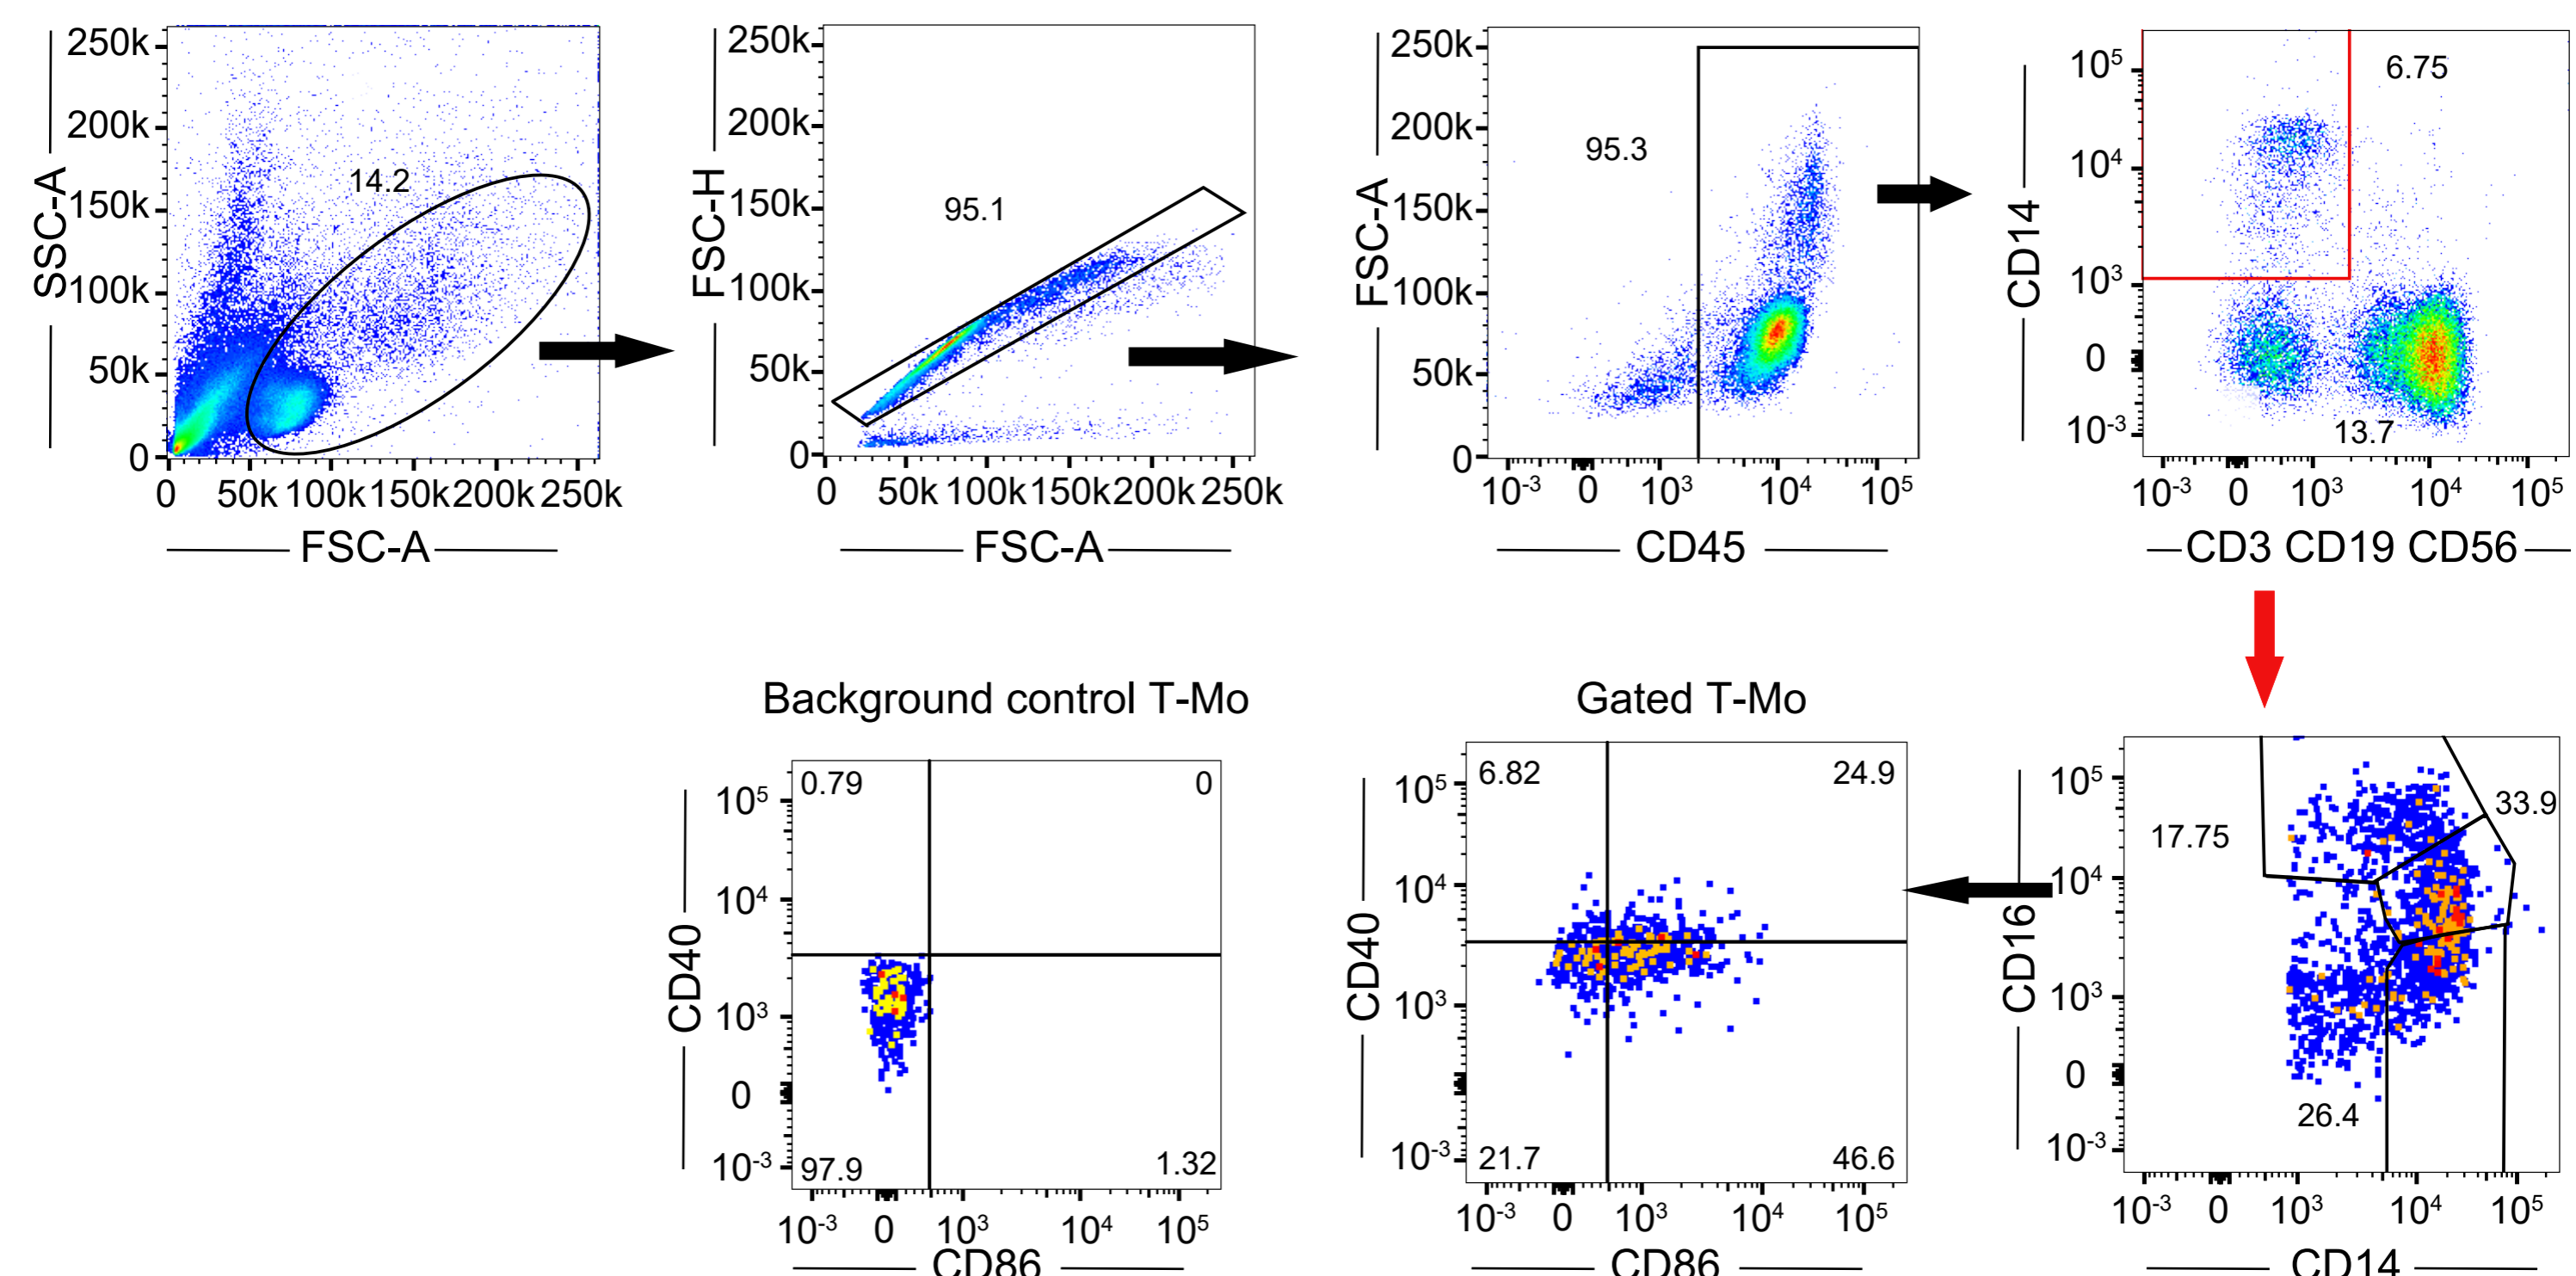

B

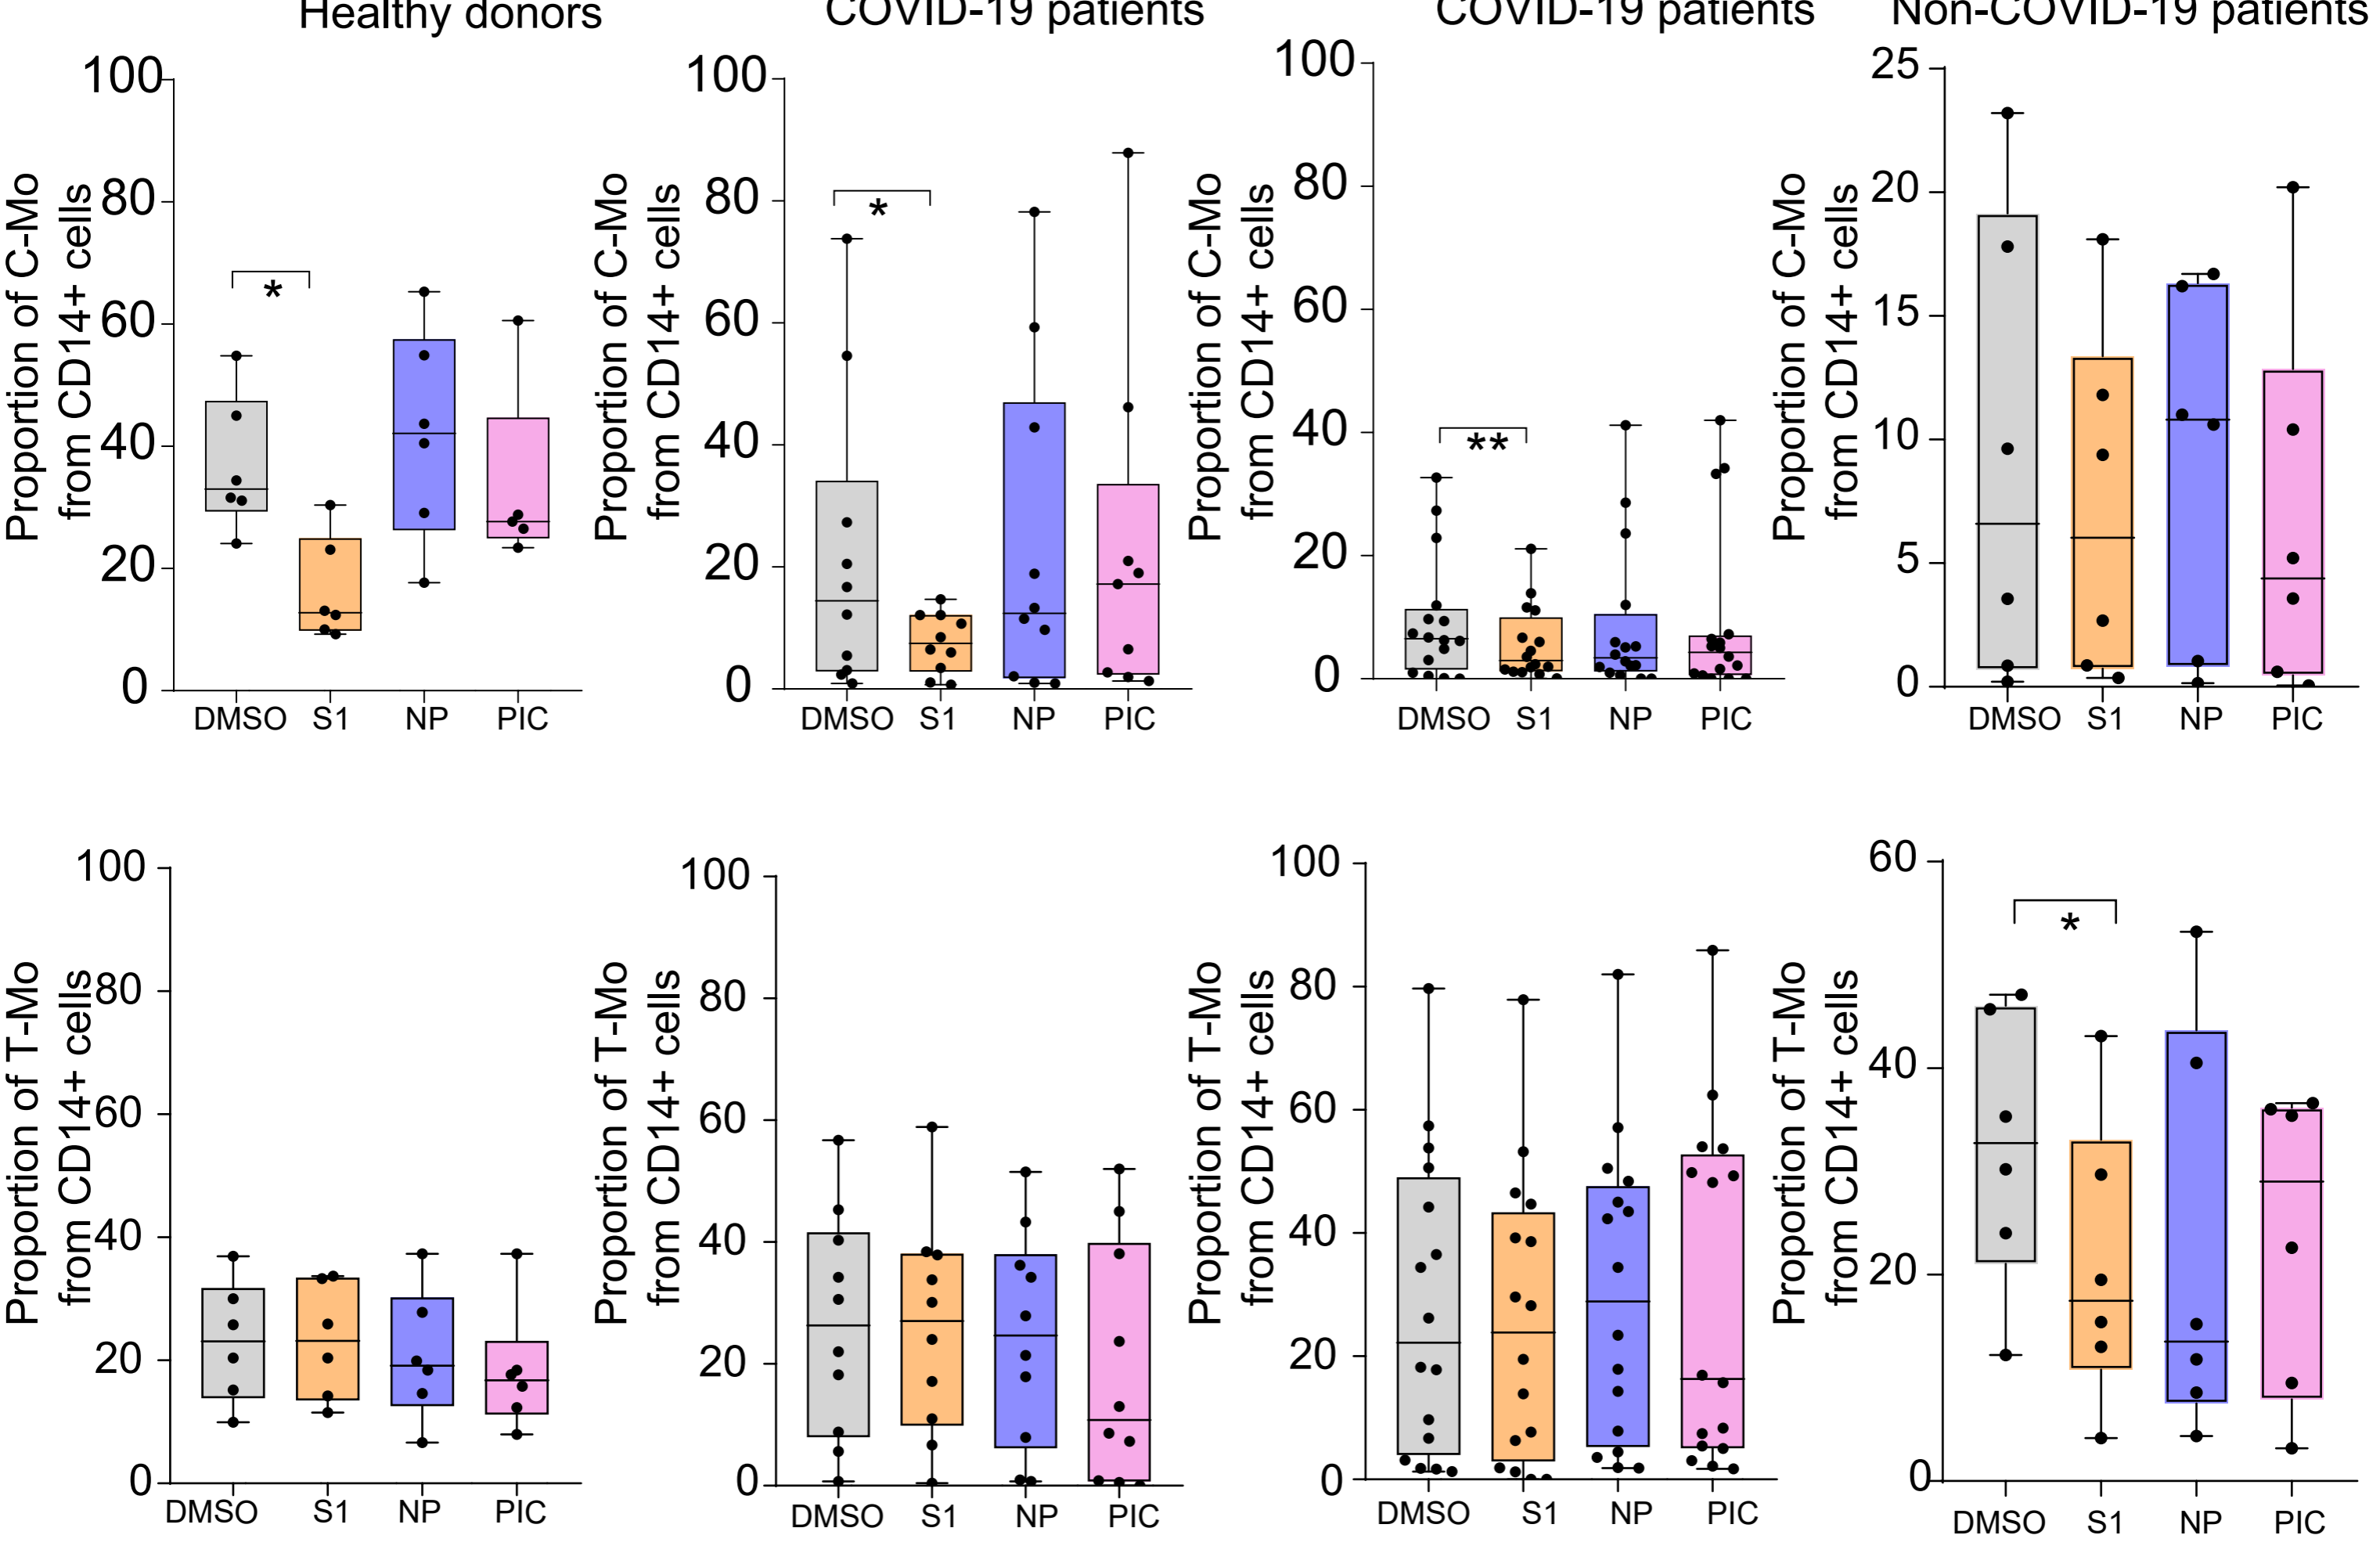

C

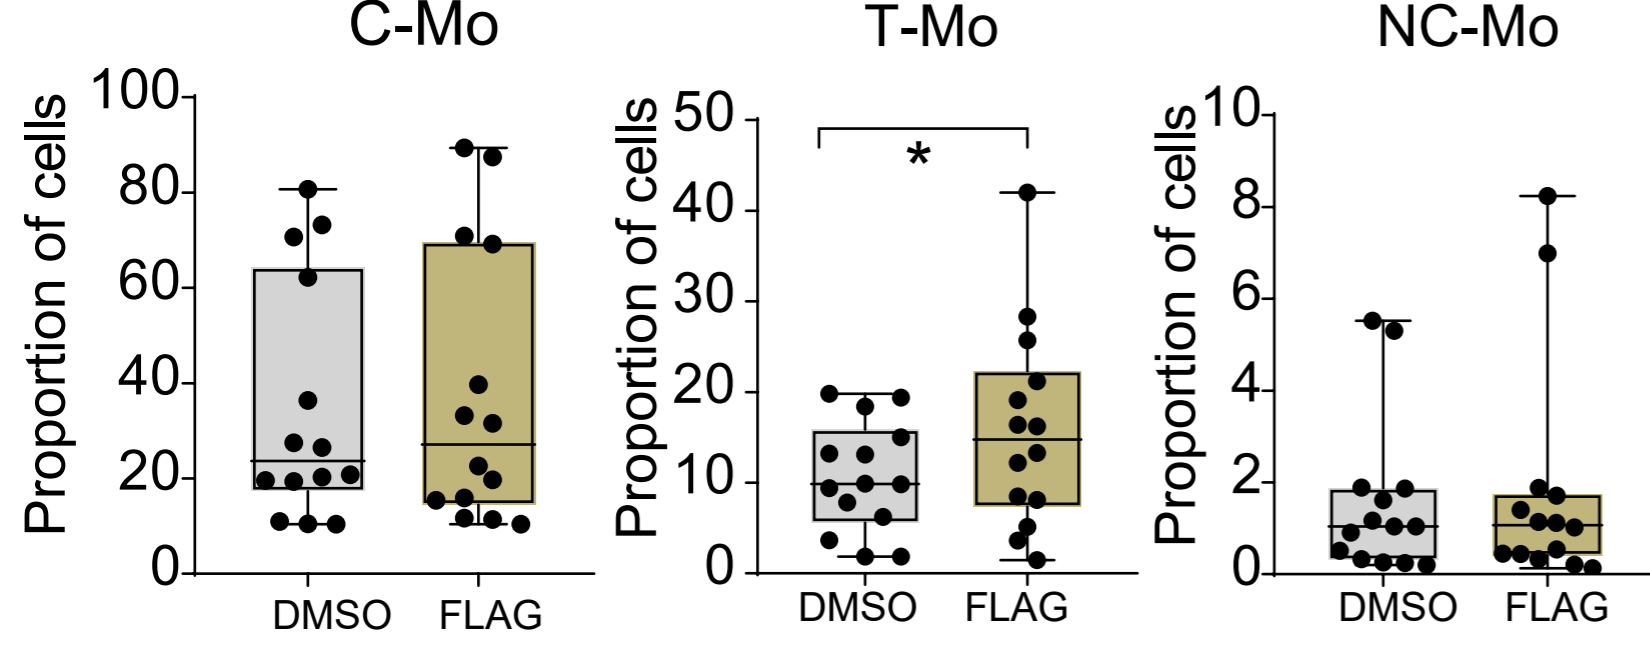

D

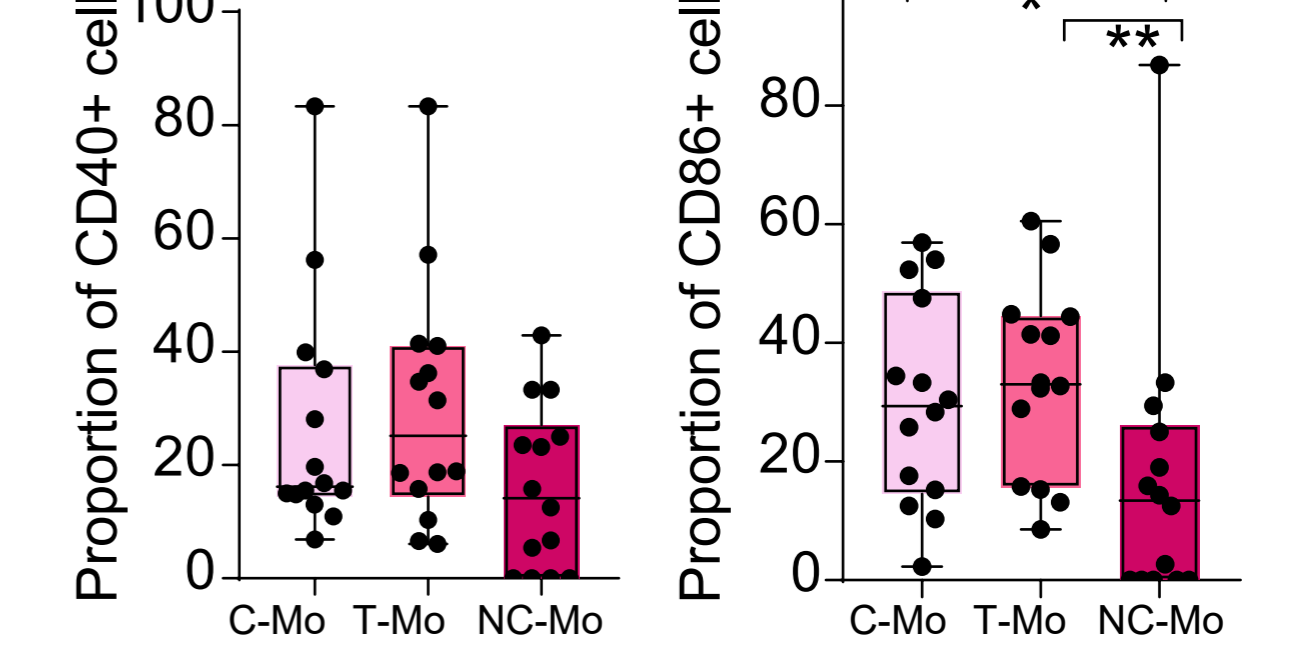

E

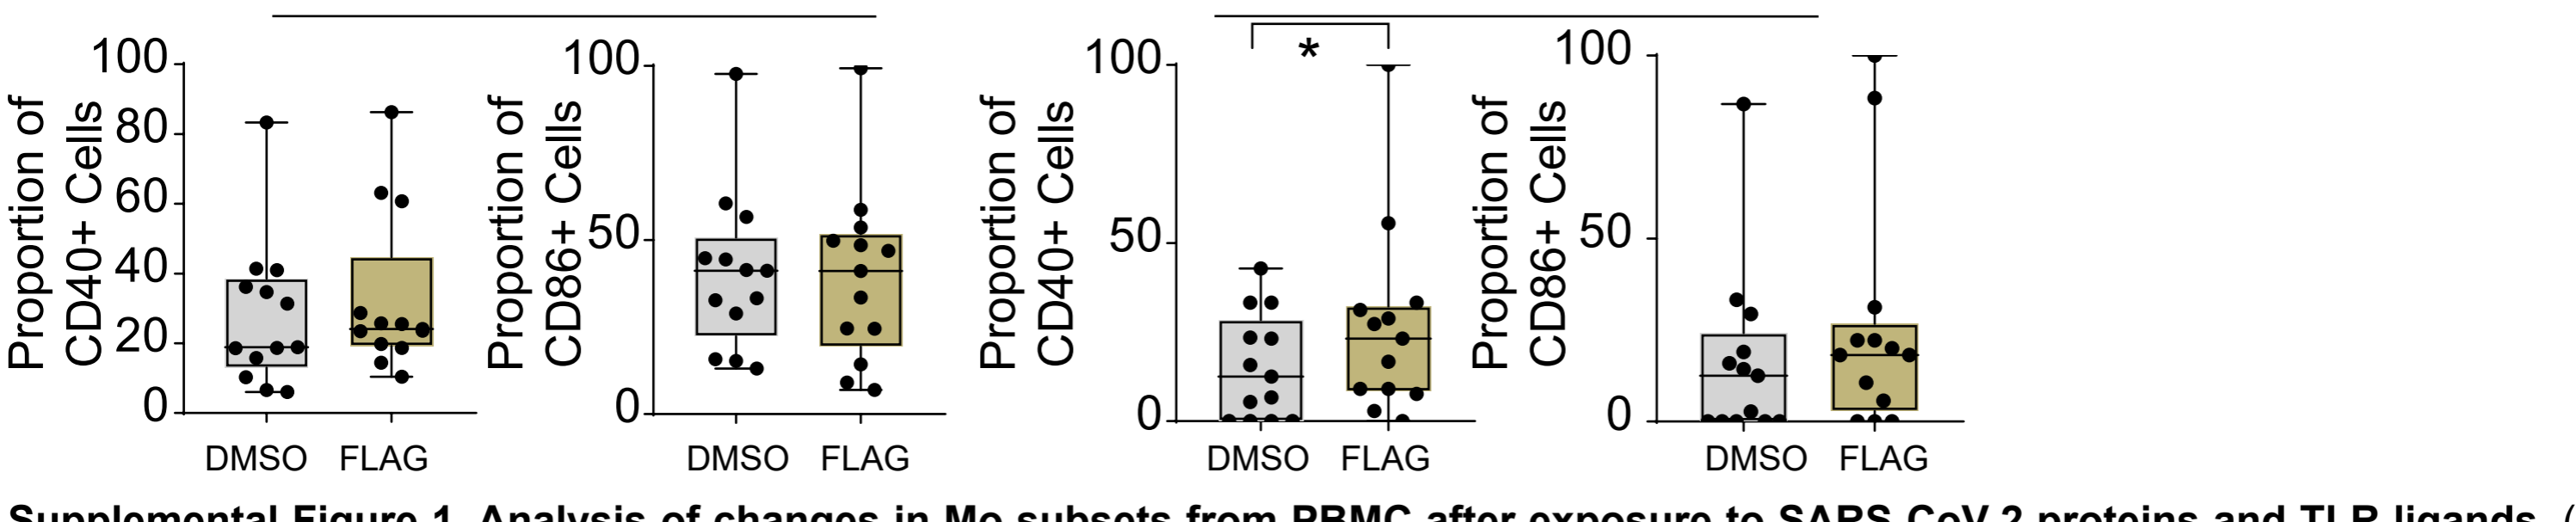

**Supplemental Figure 1. Analysis of changes in Mo subsets from PBMC after exposure to SARS-CoV-2 proteins and TLR ligands.** (A) Representative flow cytometry gating strategy defining CD14+ CD3-CD19-CD56- Mo from PBMC and identifying Classical (C-Mo), Transitional (T-Mo) and non-classical (NC-Mo) Mo subsets based on differential levels of CD16 and CD14. Levels of CD40 vs CD86 on gated cells from each population were also analyzed. A representative flow cytometry plot on gated T-Mo and the background control for this subset is also shown. (B): Proportions of C-Mo and T-Mo from cultures of bulk PBMC (n=10) and BAL (n=16) from COVID-19 patients, PBMC from healthy donors (n=6) or BAL from non-COVID-19 patients (n=6) in DMSO (grey), S1 peptide (orange), NP peptide (purple) and Poly I:C (PIC, pink) condition. (C): Proportions of C-Mo, T-Mo and NC-Mo in pre-isolated CD14+ Mo (C) after 16h of culture in the presence of DMSO (grey) and flagellin (FLAG, khaki) (n=14). (D) Proportions of CD40+ and CD86+ cells in C-Mo (light pink), T-Mo (pink) and NC-Mo (magenta) populations at baseline conditions in DMSO (n=14). (E): Percentages of CD40+ and CD86+ cells in the indicated Mo subsets on each of the mentioned culture conditions in (C) n=13. Statistical significance was calculated using a two tailed Wilcoxon test: \*p<0.05, \*\*p<0.01. Data are represented as box and whiskers with bars representing maximum and minimum values and with median highlighted as a line

## Supplemental Figure 2

A

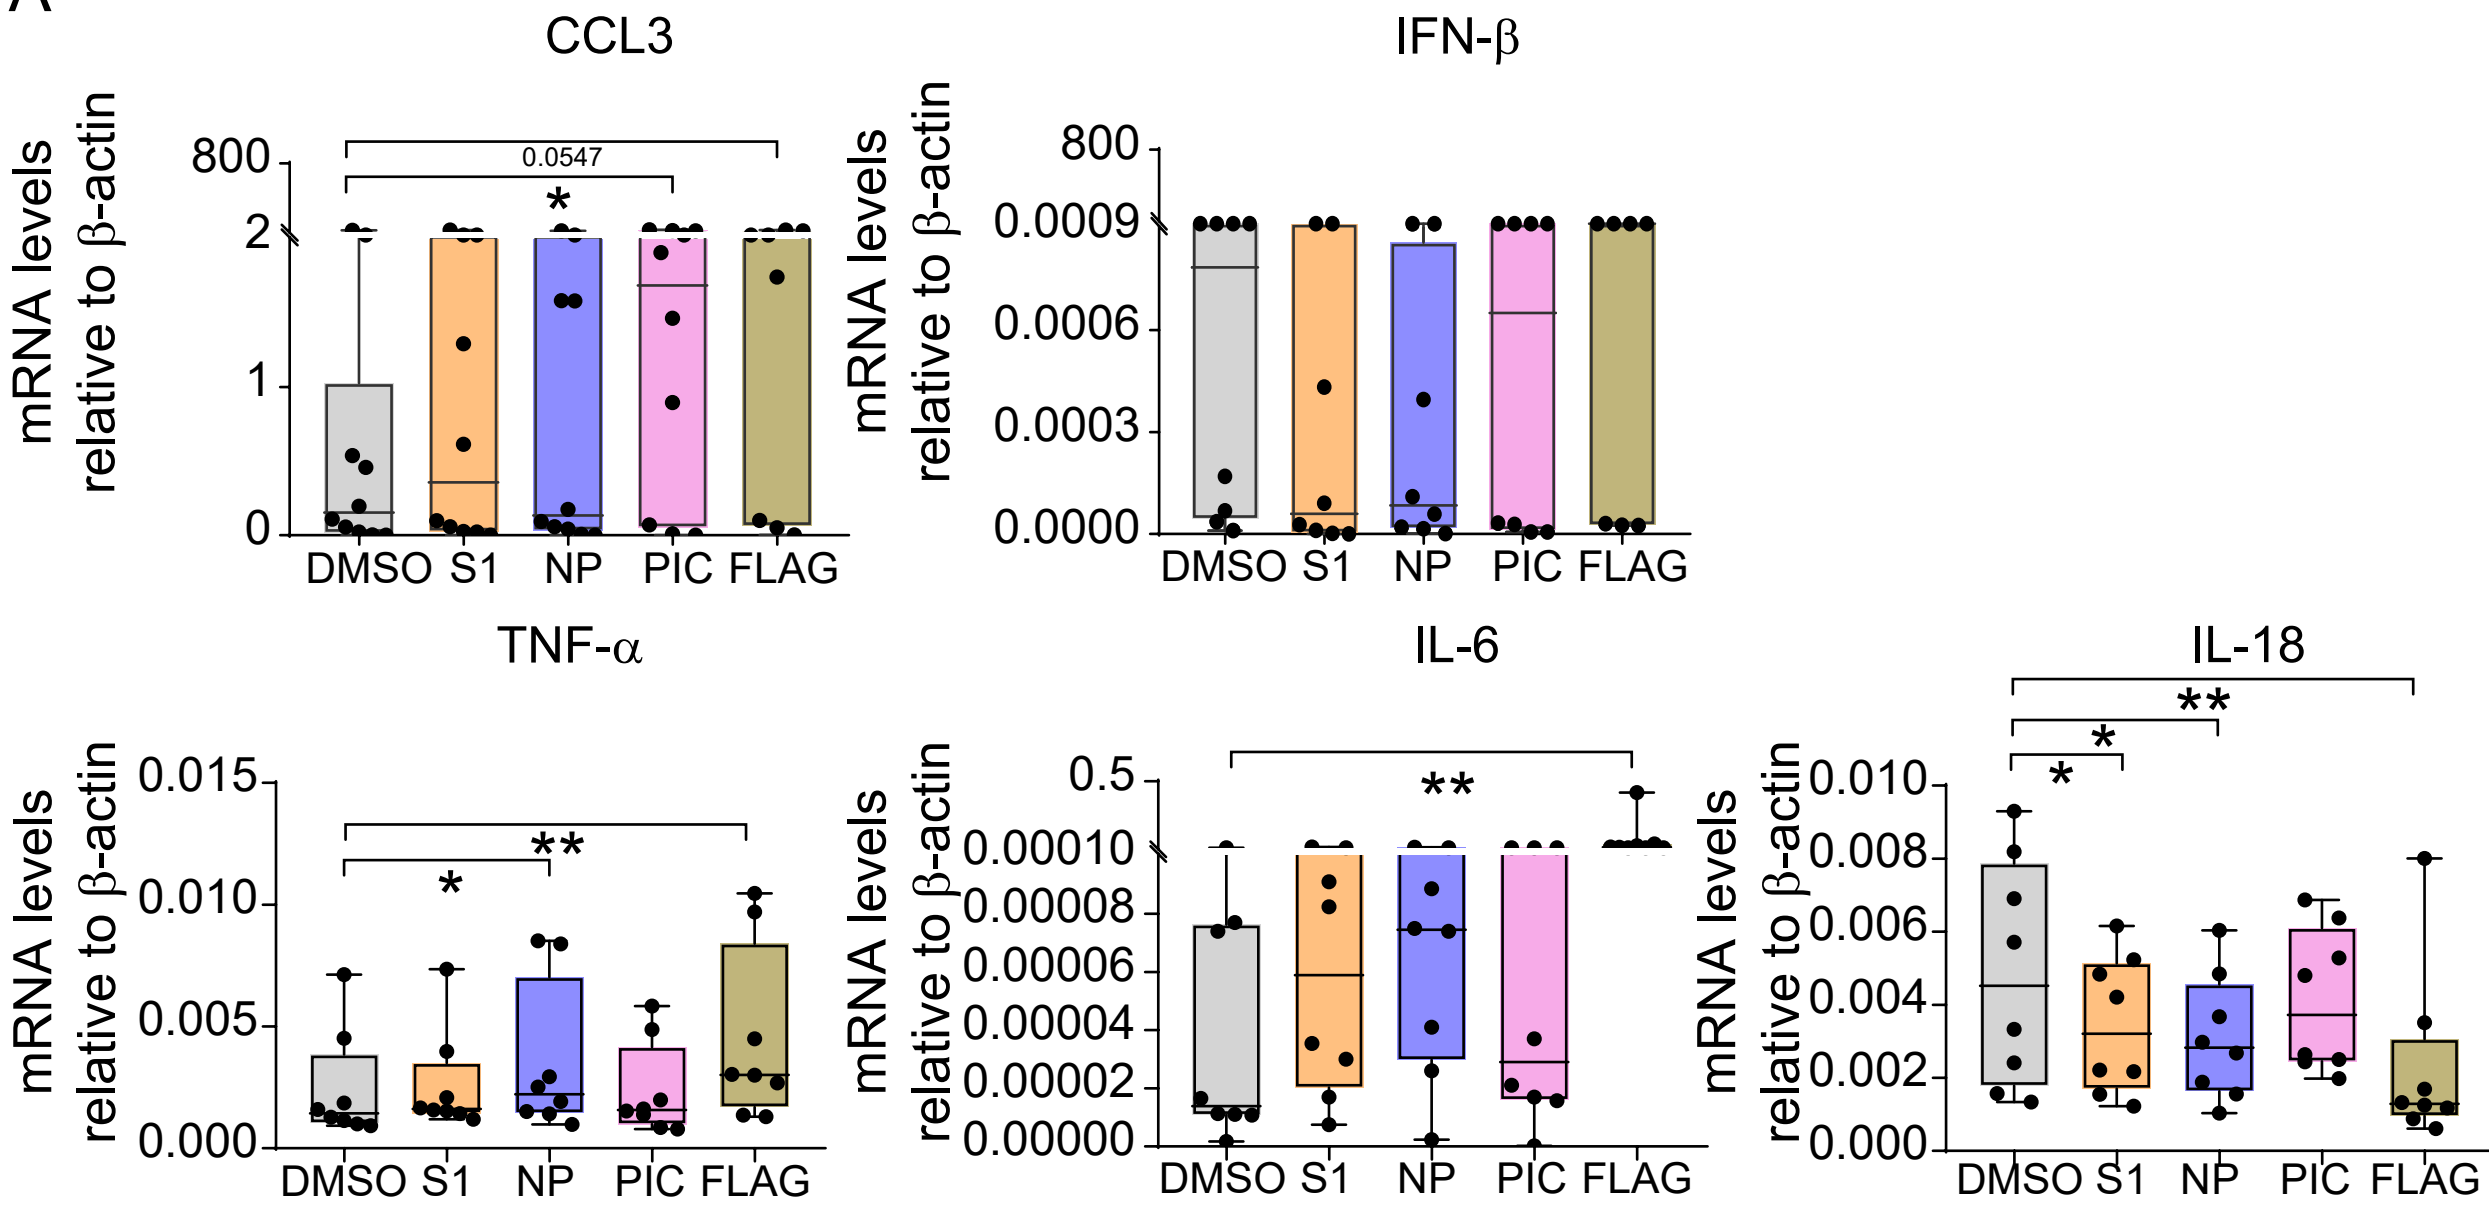

B

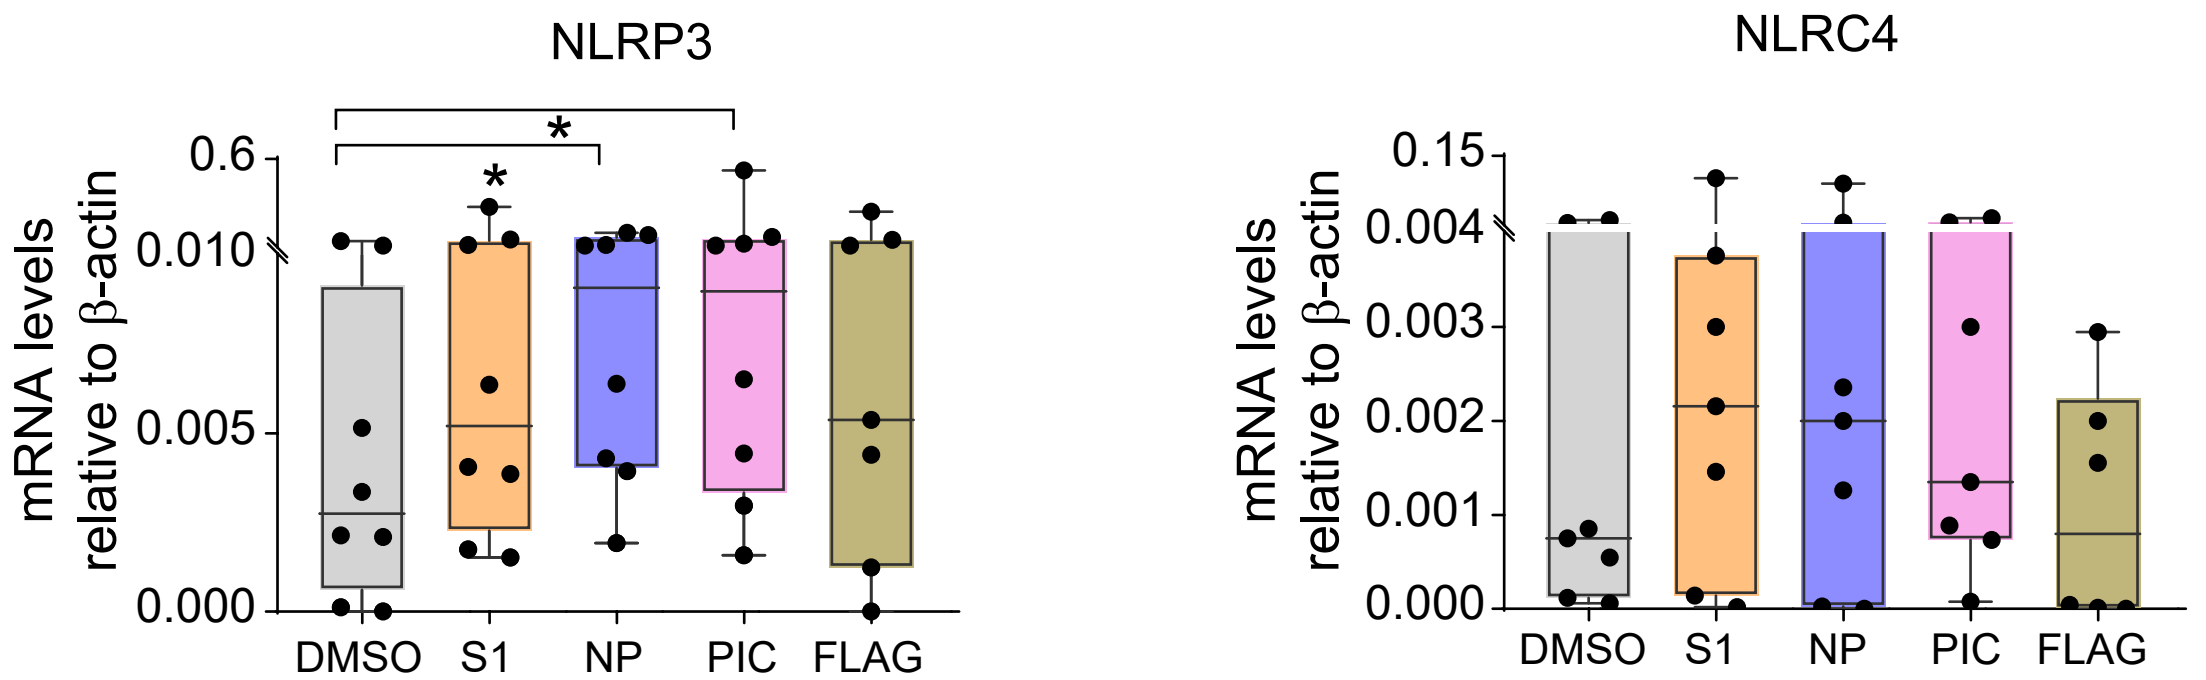

C

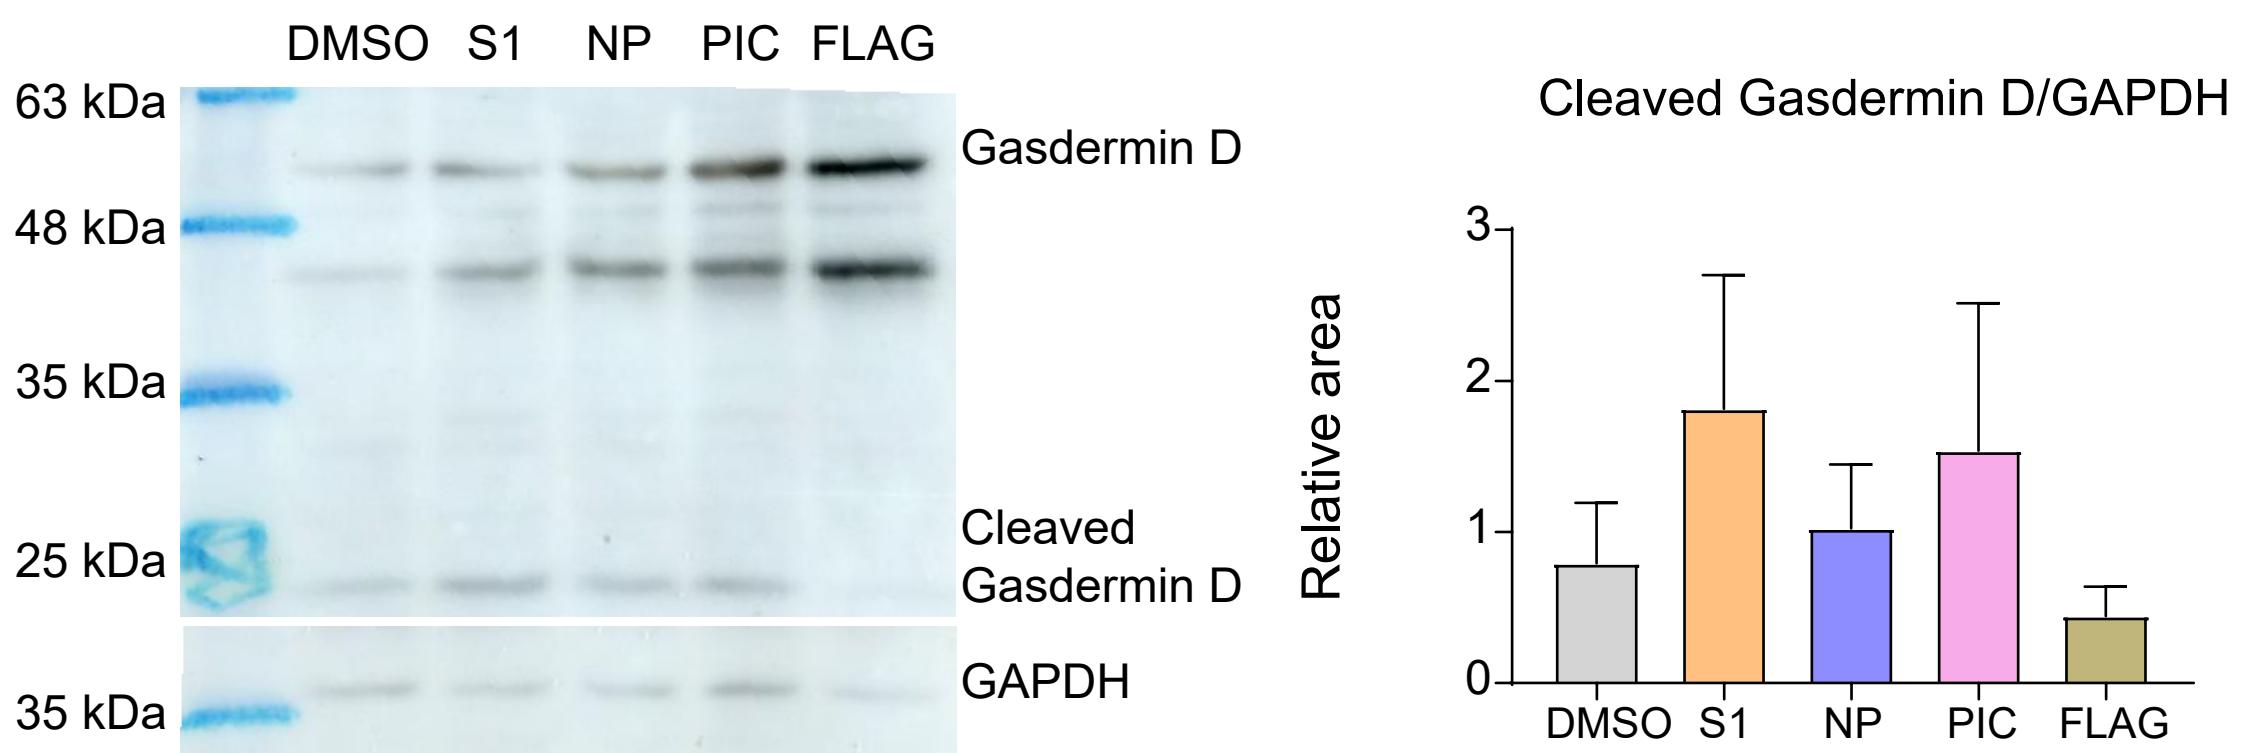

D

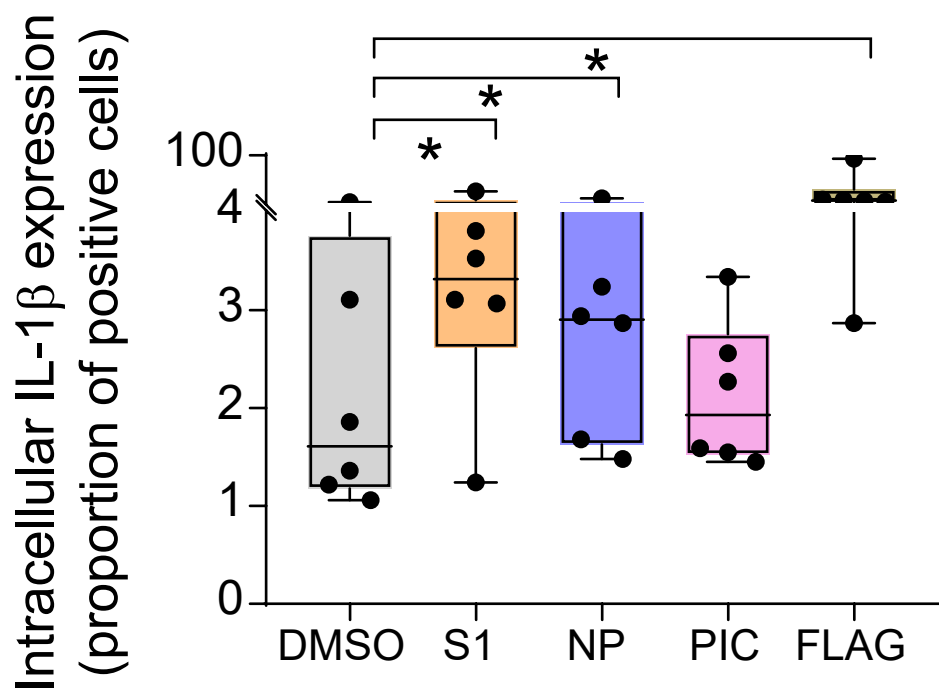

E

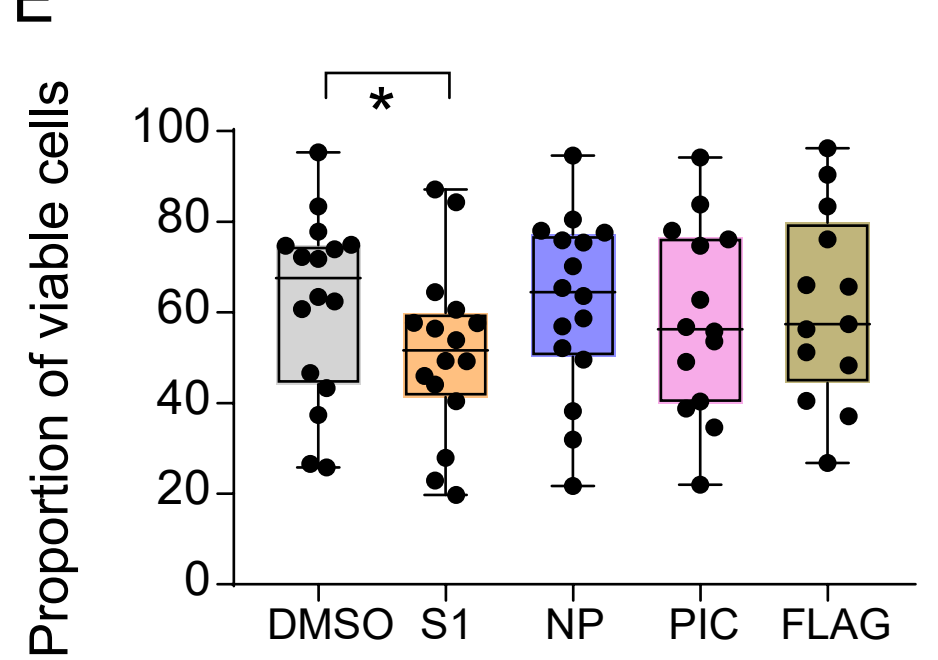

F

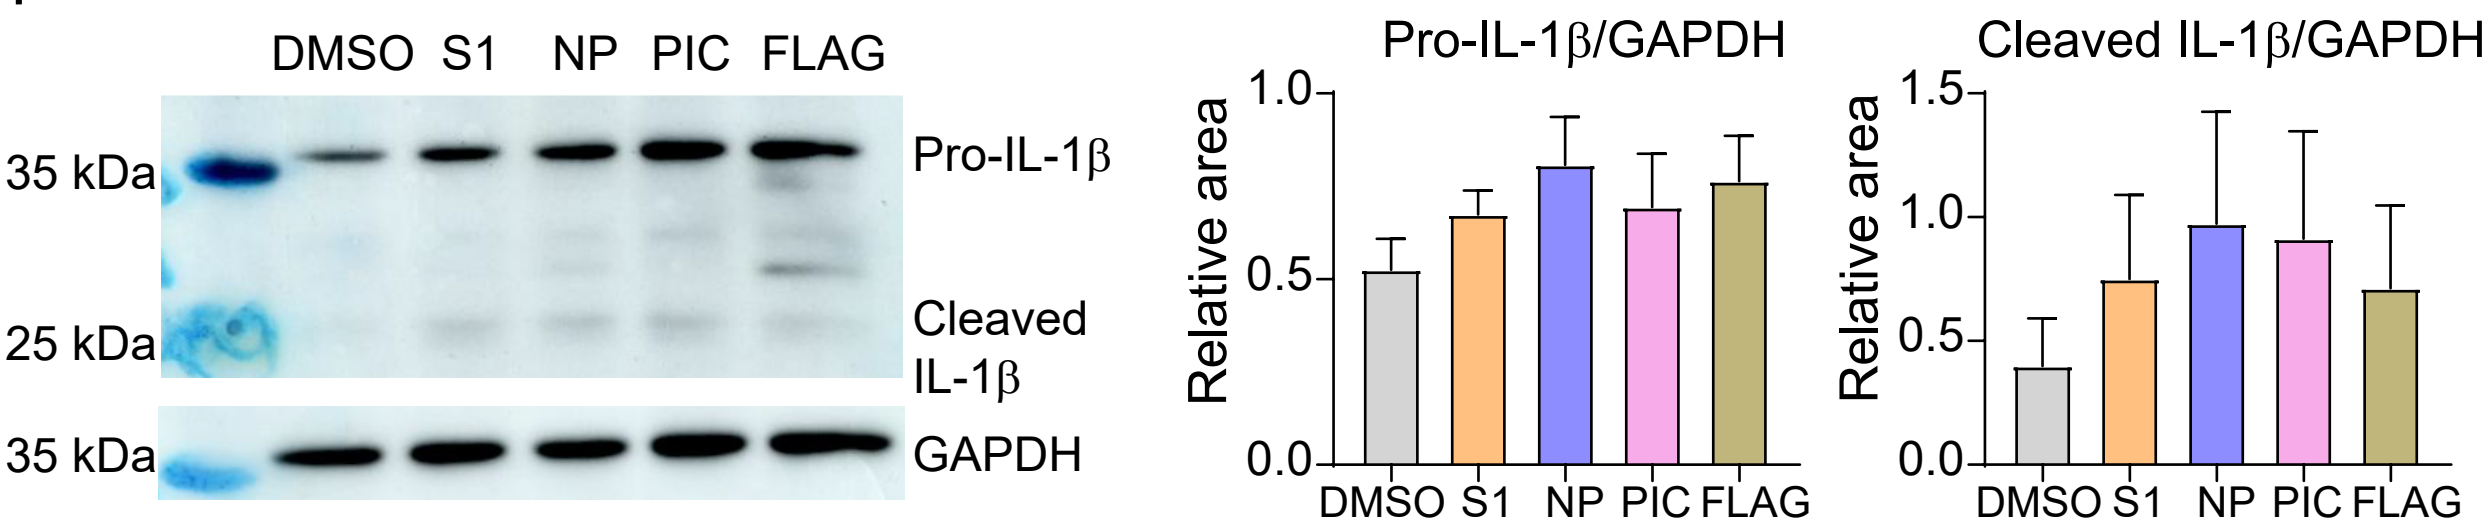

**Supplemental Figure 2. Transcriptional levels of proinflammatory cytokines and inflammasome sensors in Mo exposed to SARS-CoV-2 proteins and TLR ligands.** (A, B): mRNA levels quantified by RT- qPCR of CCL3 (n=10), IFN $\beta$ , TNF- $\alpha$ , IL-6 and IL-18 (n=8) (A) and NLRP3 (n=8) and NLRC4 (n=7) inflammasome sensors (B) in isolated CD14<sup>+</sup> Mo cultured in the presence of DMSO or S1 peptide (orange), NP peptide (purple), Poly I:C (PIC, pink), flagellin (FLAG, khaki). Transcriptional levels were normalized to the  $\beta$ -actin expression. (C-F): Representative Western blot analysis of Gasdermin D (C) and IL-1 $\beta$  (F) uncleaved and processed isoforms and GAPDH in Mo cultured in the mentioned conditions. Quantification of results relative to GAPDH from three independent experiments for both proteins is shown on the right. Data in these panels is represented as mean and error bars correspond to SEM. (D, E): Proportions of IL-1 $\beta$ <sup>+</sup> (D; n=6) and viable (E; n=16) Mo in the previously mentioned culture conditions. Statistical significance in (A, B, D, E) was calculated using a two tailed Wilcoxon test: \*p<0.05, \*\*p<0.01. Data are represented as box and whiskers with bars representing maximum and minimum values and with median highlighted as a line



# Supplemental Figure 3

## A

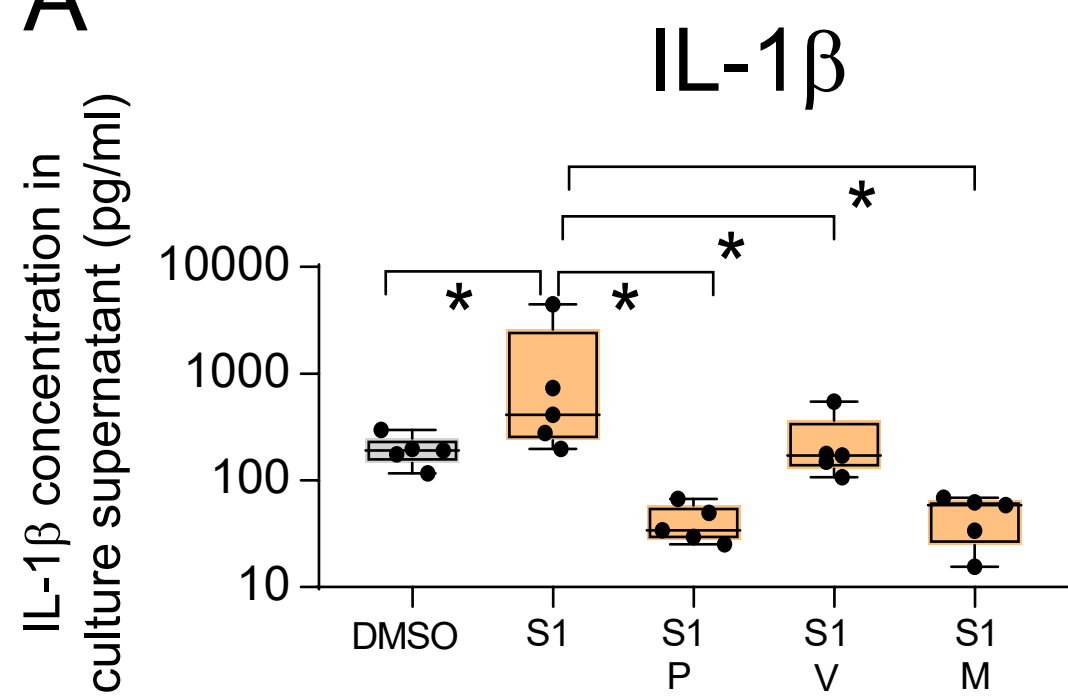

## B

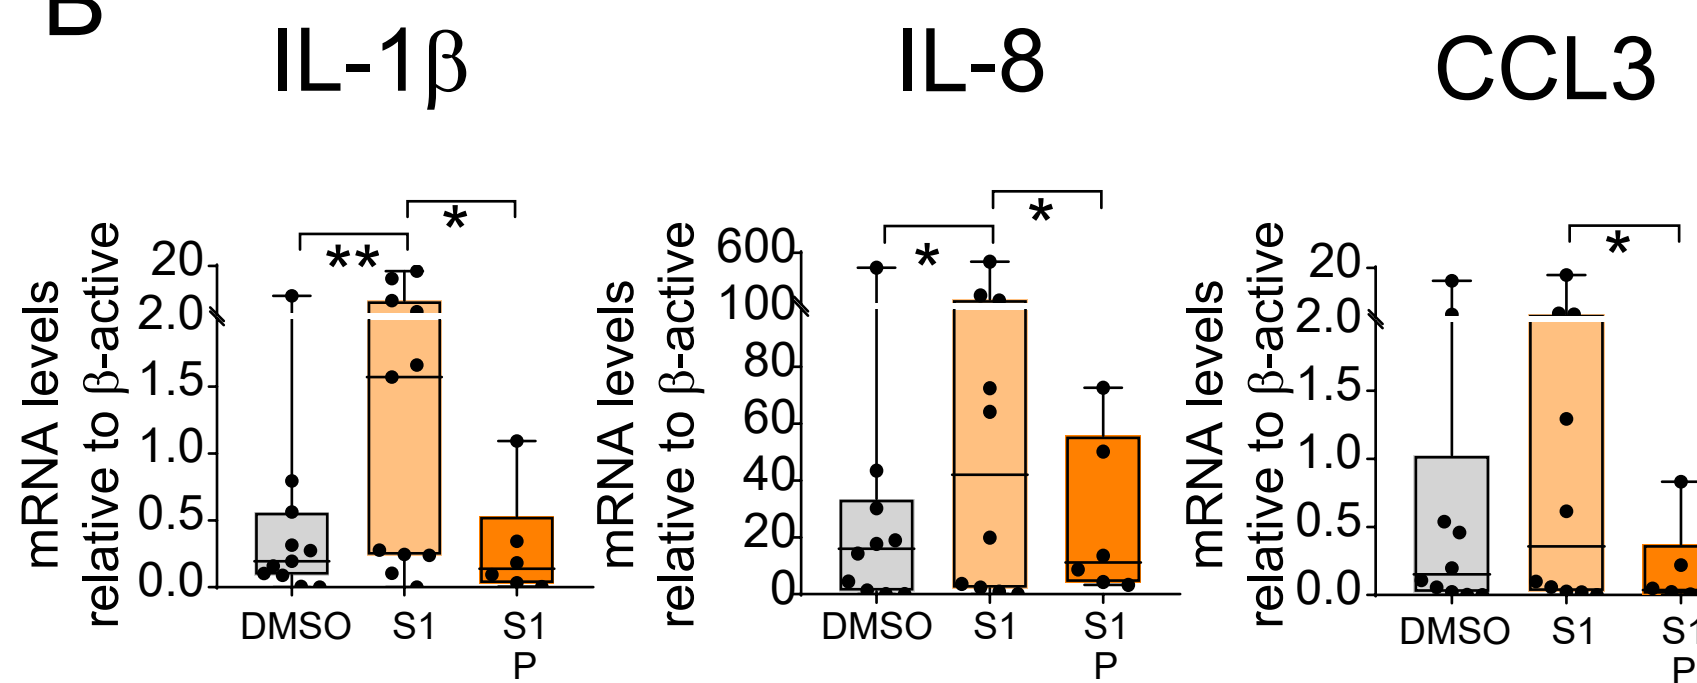

## C

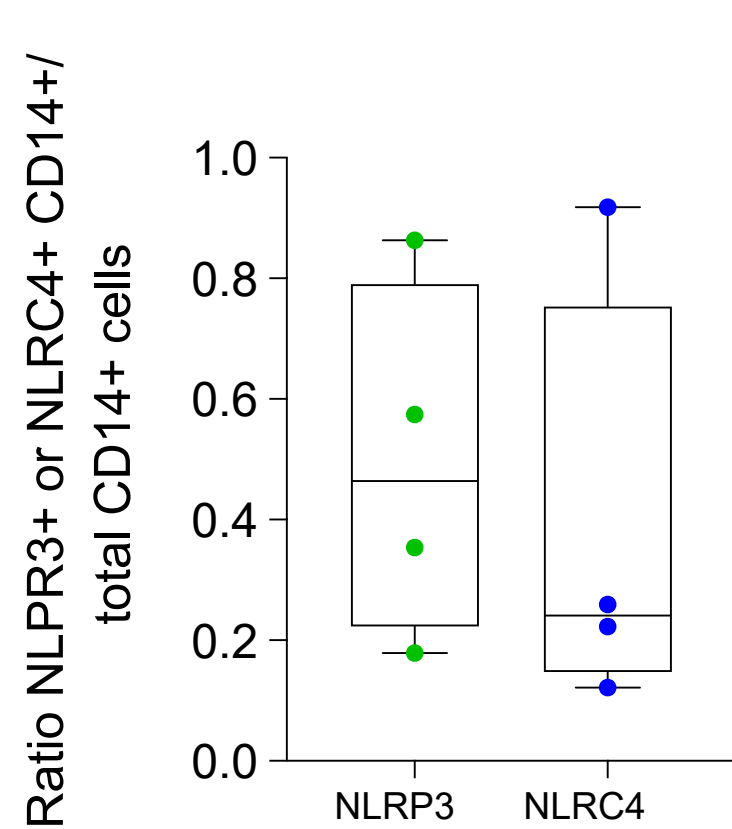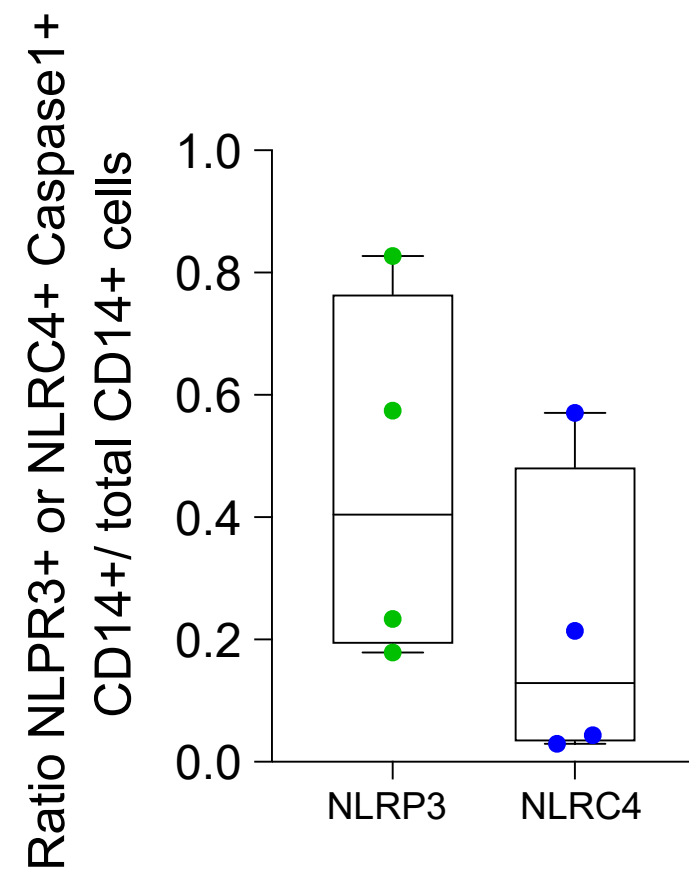

## D

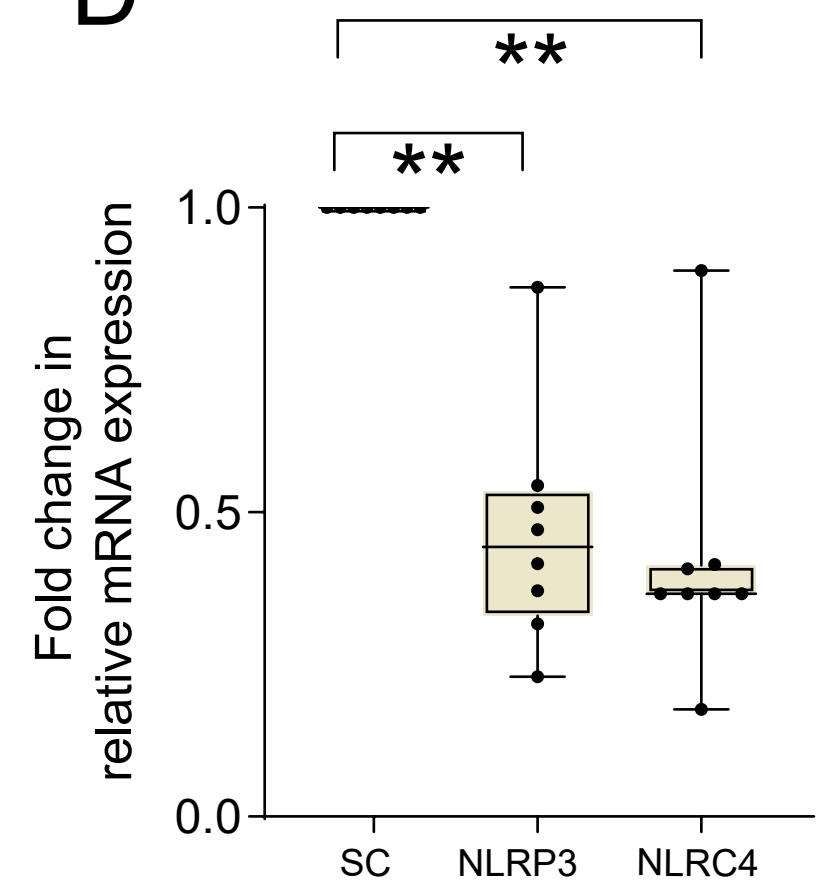

## E

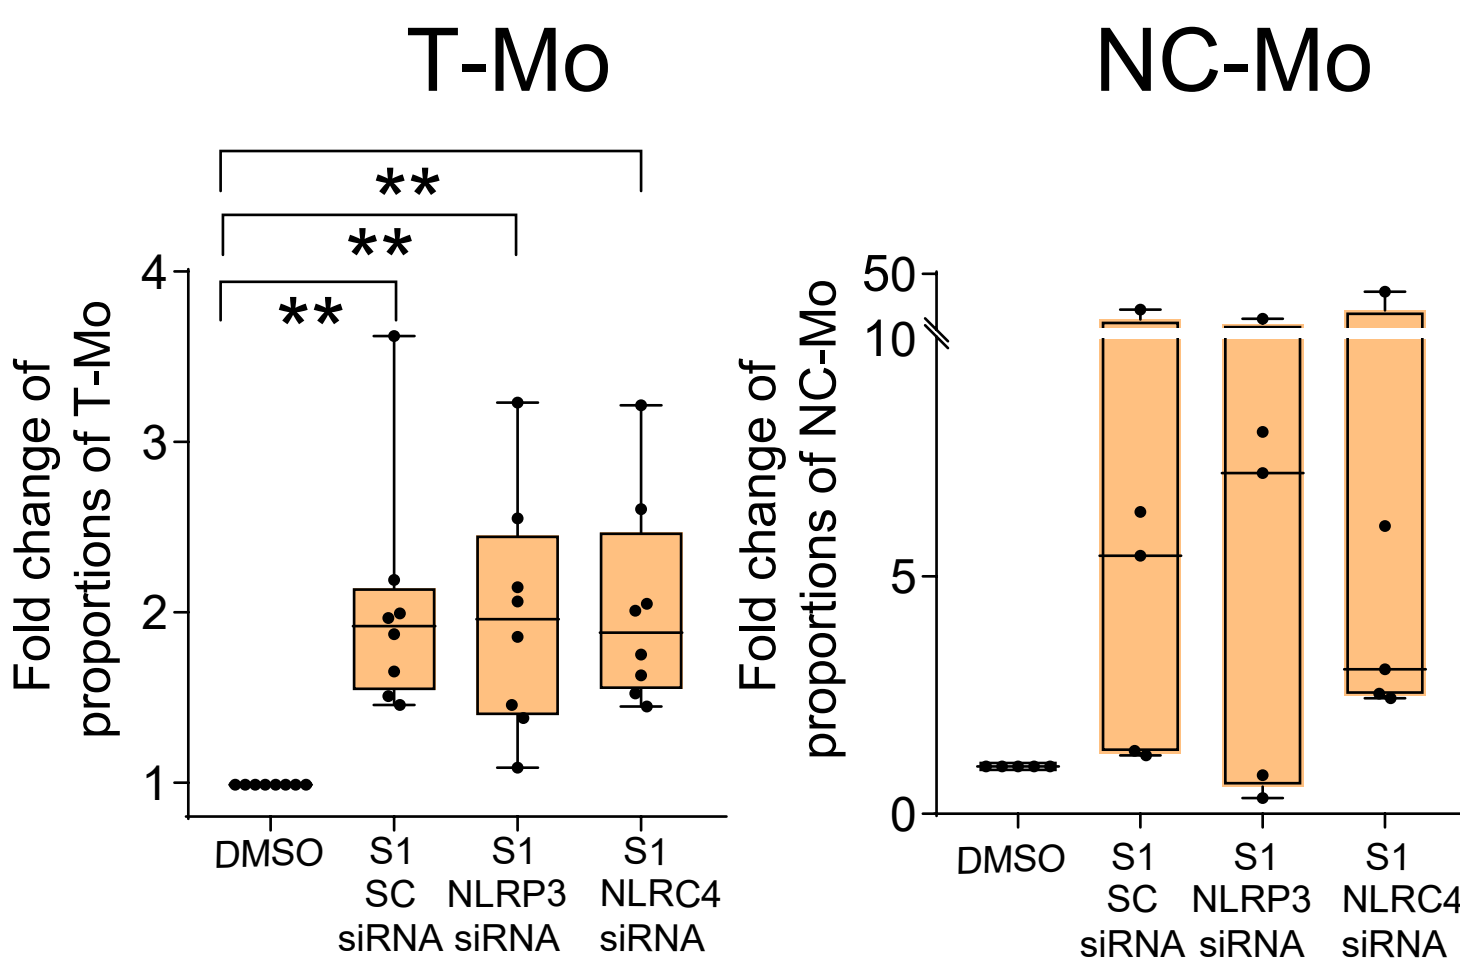

## F

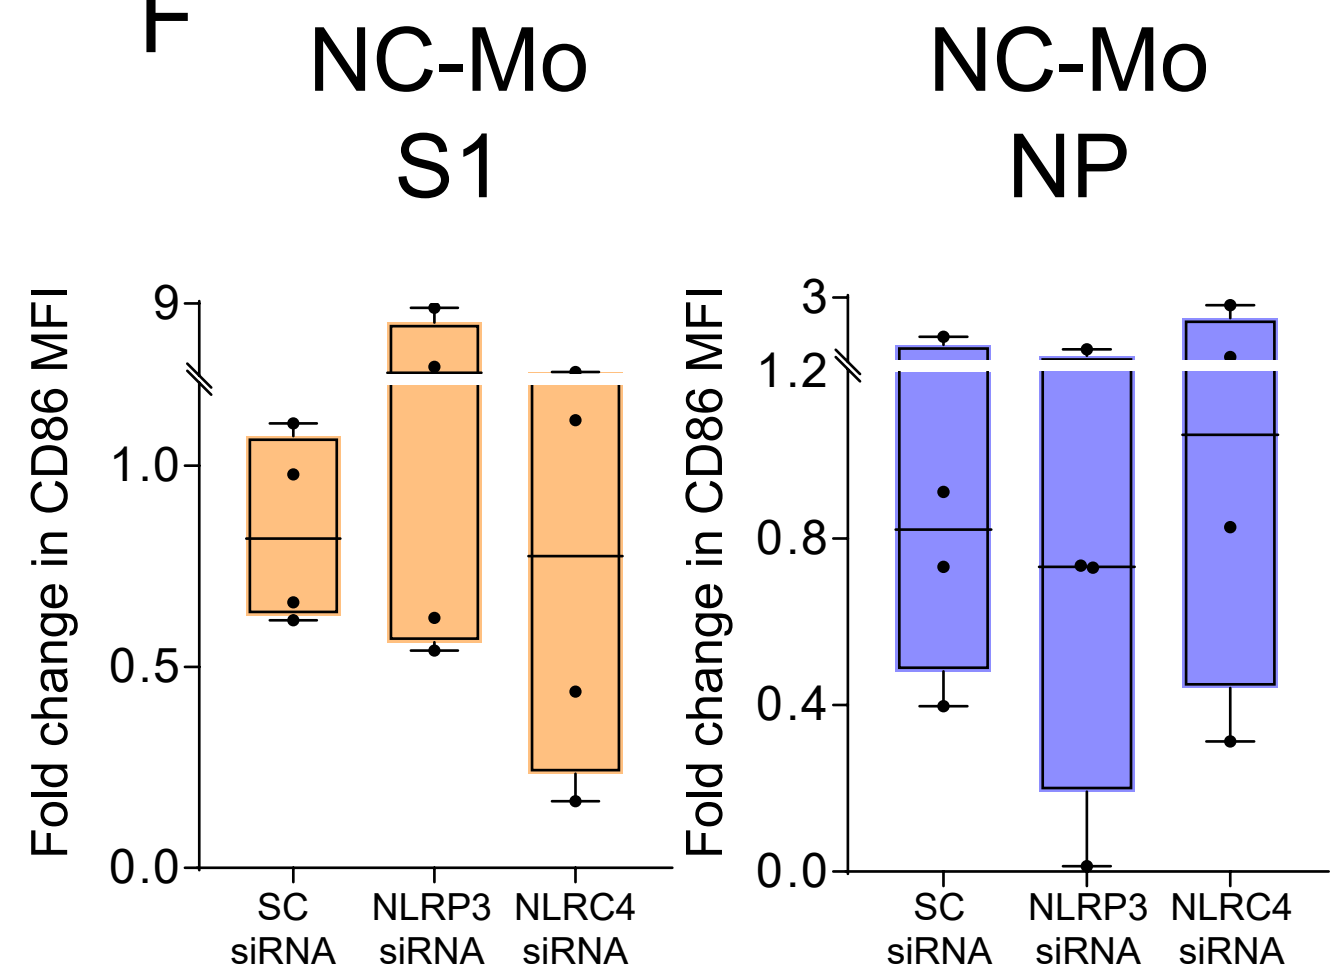

## G

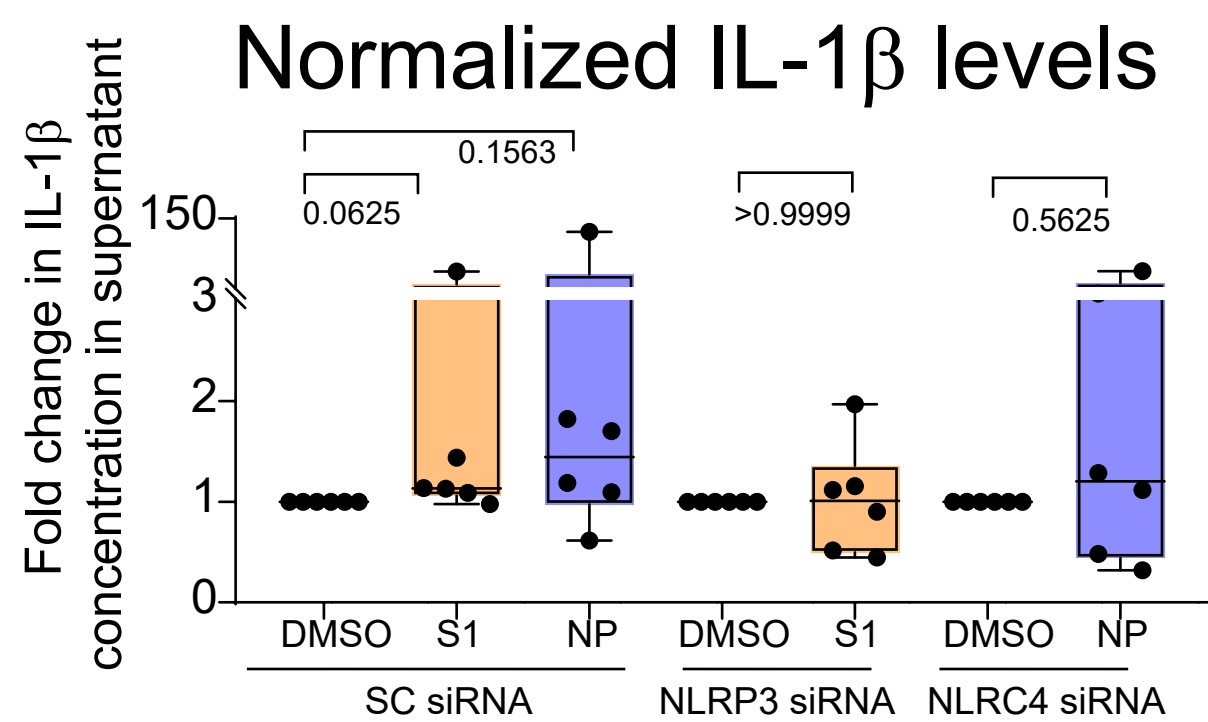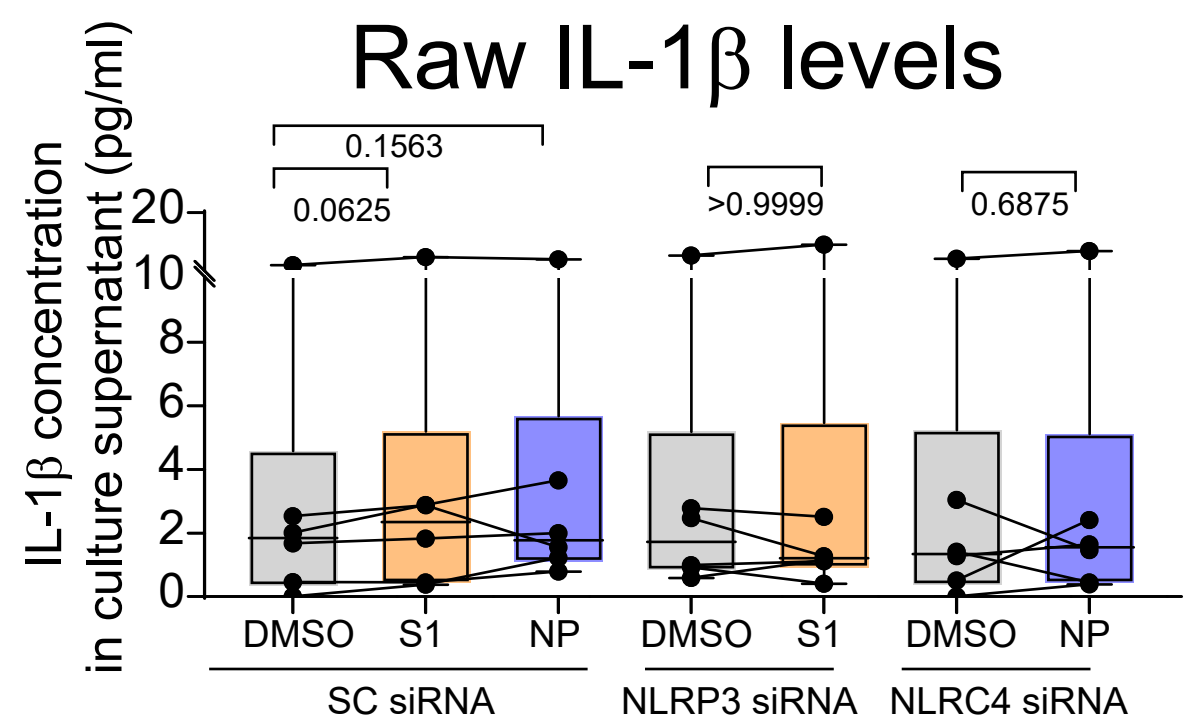

**Supplemental Figure 3. Pharmacological and siRNA mediated inhibition of the inflammasome and NF $\kappa$ B.** (A): ELISA quantification of the concentrations of secreted IL-1 $\beta$  protein in culture supernatants of Mo cultured in the presence of DMSO (grey) versus S1 (orange) in the presence of DMSO or Parthenolide (P), Z-VAD-FMK (V), and MCC950 (M) (n=5). Statistical significance was calculated using a one-tailed Wilcoxon test \*p<0.05. (B) RT-qPCR analysis of IL-1 $\beta$  (n=11), IL-8 (n=10) and CCL3 (n=10) in Mo cultured in the absence or the presence of DMSO (grey), S1 with DMSO (orange) or with S1 and Parthenolide (P) (dark orange). (C): Quantification of ratios of cells co-expressing NLRP3 (green) or NLRC4 (blue) with CD14 alone (left) or with caspase 1 (right) from total CD14+ cells in lung tissue from n=3 critical COVID-19 patients. (D): RT-qPCR quantification of NLRP3 and NLRC4 in cells treated with specific siRNAs relative to cells nucleofected with Scramble (SC) siRNAs (n=8). Data are normalized to levels of mRNA in control condition (Scramble) and relative to  $\beta$ -actin expression. (E): Fold change in proportions of T-Mo (n=8) and NC-Mo (n=5) subsets from Mo nucleofected with scramble (SC) siRNA or siRNA specific for NLRP3 and NLRC4 and treated with S1 (orange) compared to DMSO control conditions. (F): Fold change in CD86 MFI on NC-Mo in response to viral proteins (S1 (orange) or NP (purple)) after nucleofection with scramble (SC) or NLRP3 and NLRC4-specific siRNAs (n=4). (G): Impact of nucleofection of Mo with scramble (SC), NLRP3 or NLRC4 specific-siRNAs in levels of secreted IL-1 $\beta$  in supernatants after exposure to S1 and NP compared to DMSO conditions. Normalized and raw data are shown in left and right plots, respectively. Statistical significance of differences for (B, C, D) were calculated using a two-tailed Wilcoxon test \*p<0.05, \*\*p<0.01. Data are represented as box and whiskers with bars representing maximum and minimum values and with median highlighted as a line



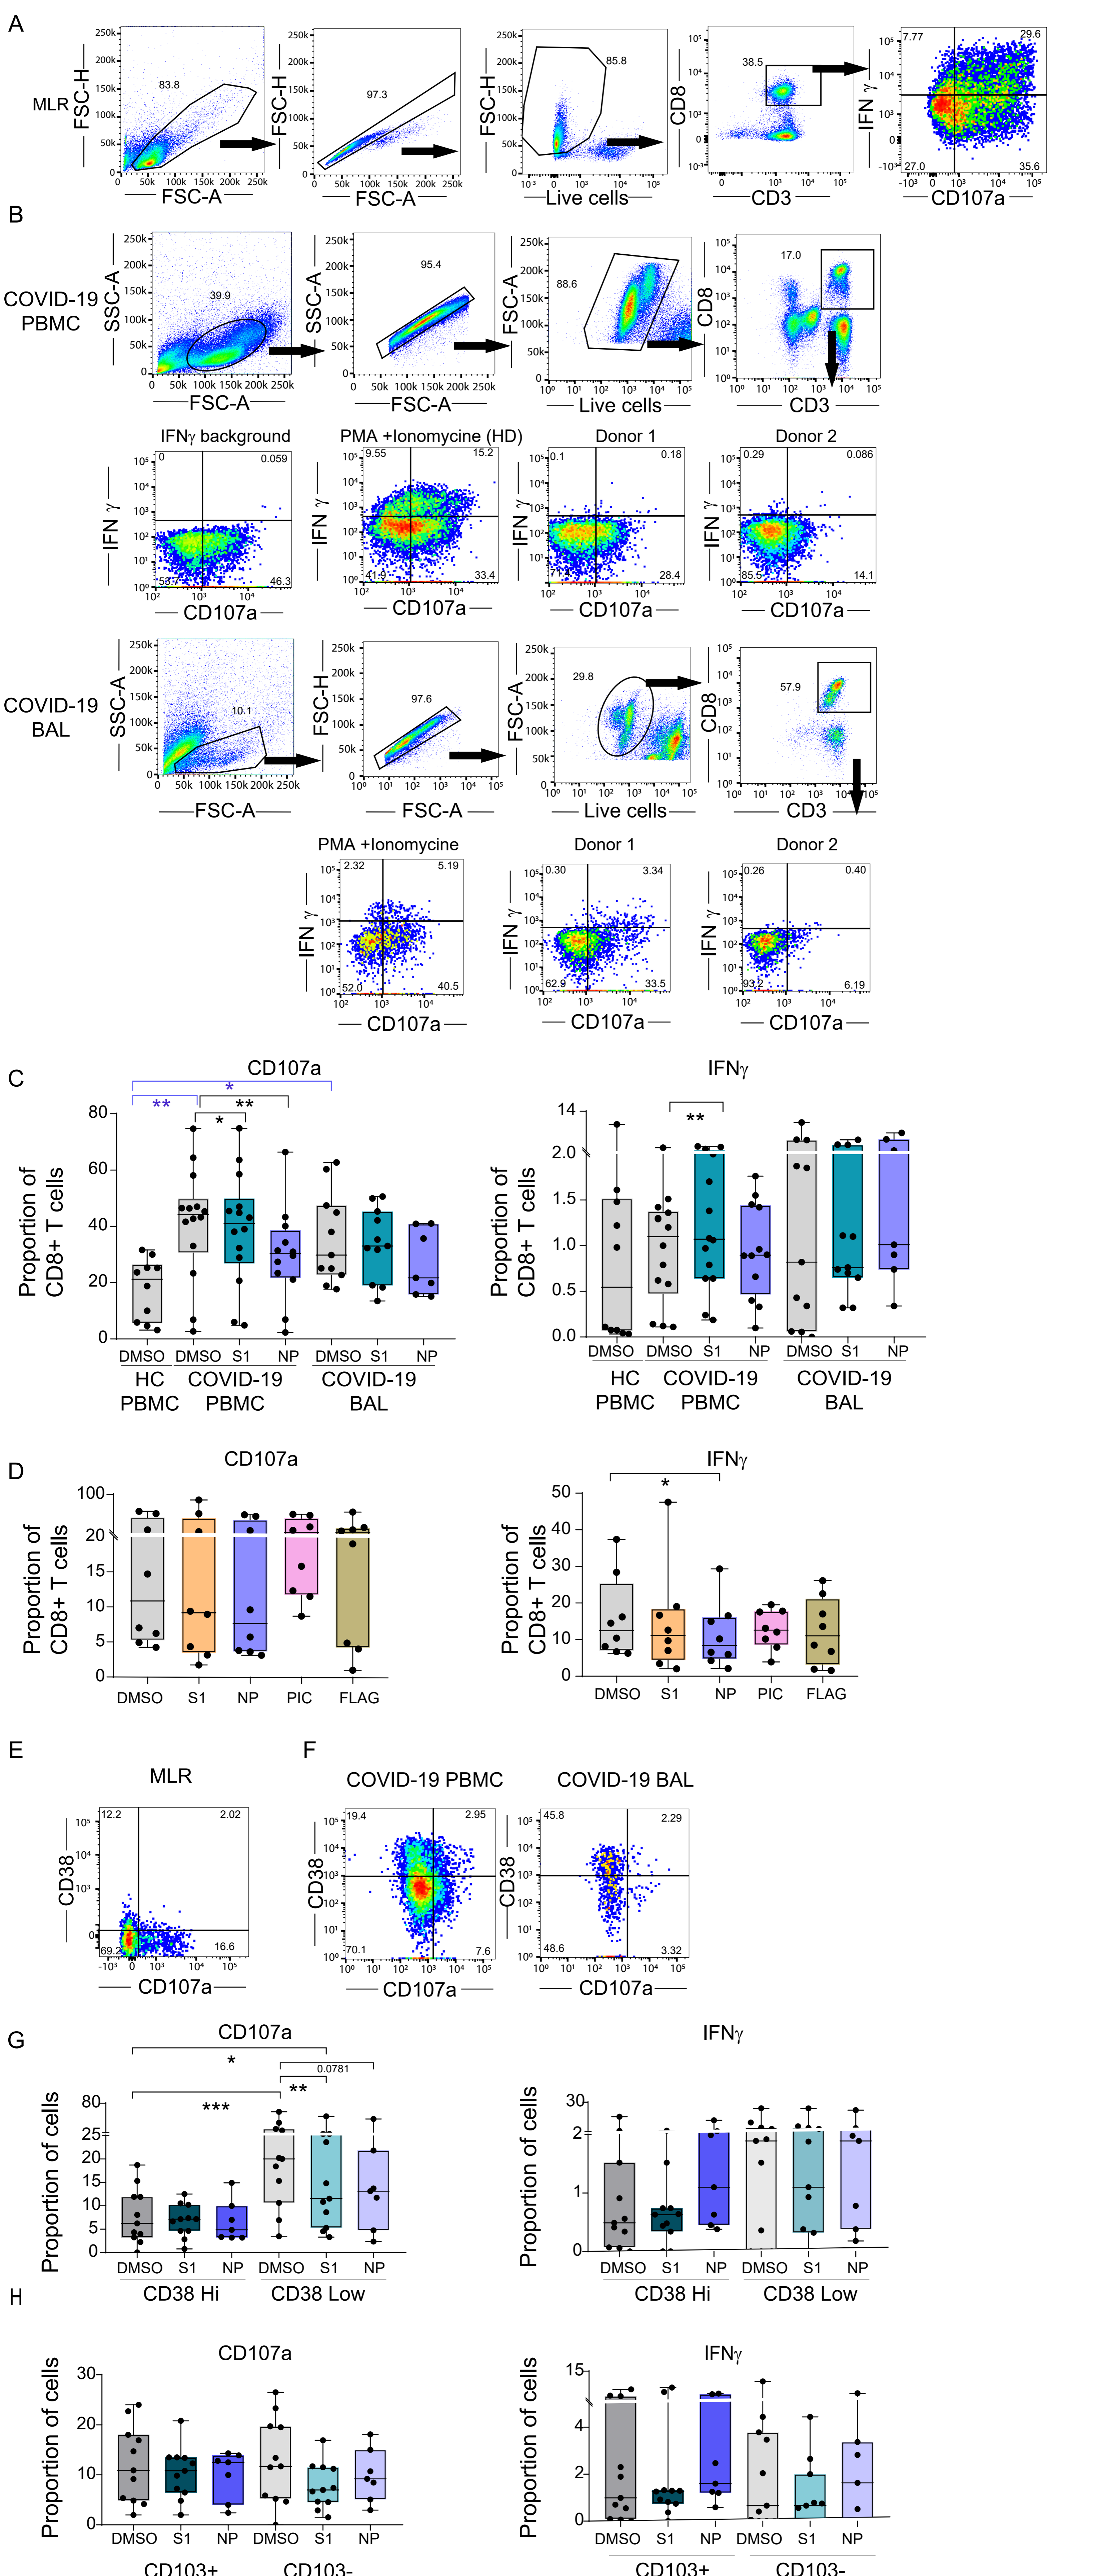

**Supplemental Figure 4. CD8+ T cell responses induced by primed Mo and specifically induced in COVID-19 PBMC and BAL after stimulation with SARS-CoV-2 S1 and NP proteins.** (A, B): Representative flow cytometry gating strategy defining CD8+ T cells and expression of IFN $\gamma$  and CD107a in MLR assays (A) and in PBMC and BAL from COVID-19 patients (B). Positive controls with PMA and Ionomycin are shown, as well as representative examples from selected patients. (C): Expression of CD107a (left) and IFN $\gamma$  (right) on CD8+ T cells from PBMC (n=14) and from COVID-19 BAL samples (n=11) from critical COVID-19 patients at baseline and after stimulation with S1 (green) and NP (purple) peptides or DMSO (grey). Baseline levels from PBMCs obtained from healthy donors cultured in the presence of DMSO (grey) or S1 (orange), NP (purple), Poly I:C (PIC; pink), Flagellin (FLAG, khaki) and corresponding to normalized data shown in figure 4 (n=8). (D): Proportions of CD107a+ and IFN $\gamma$ + CD8+ T cells in BAL assays performed in the presence of allogeneic Mo cultured in the presence of DMSO (grey) or S1 (orange), NP (purple), Poly I:C (PIC; pink), Flagellin (FLAG, khaki) and corresponding to normalized data shown in figure 4 (n=8). (E, F): Representative flow cytometry dot plots showing CD38 vs CD107a expression in CD8+ T cells from MLR assays (E) and from COVID-19 BAL and PBMC samples (F). (G, H): Proportions of IFN $\gamma$ + and CD107a+ cells in CD38Hi and CD38Low (G) or in CD103+ and CD103- (H) CD8+ T cells from BAL exposed to DMSO (dark grey, grey) or SARS-CoV-2 S1 (dark green, green) or NP (blue, light purple) (n=11). A Mann-Whitney test was used to determine differences between experimental conditions as represented in the different groups. Statistical differences between experimental conditions are highlighted with asterisks: \*p<0.05, \*\*p<0.01, \*\*\*p<0.001. Data are represented as box and whiskers with bars representing maximum and minimum values and with median highlighted as a line.



A

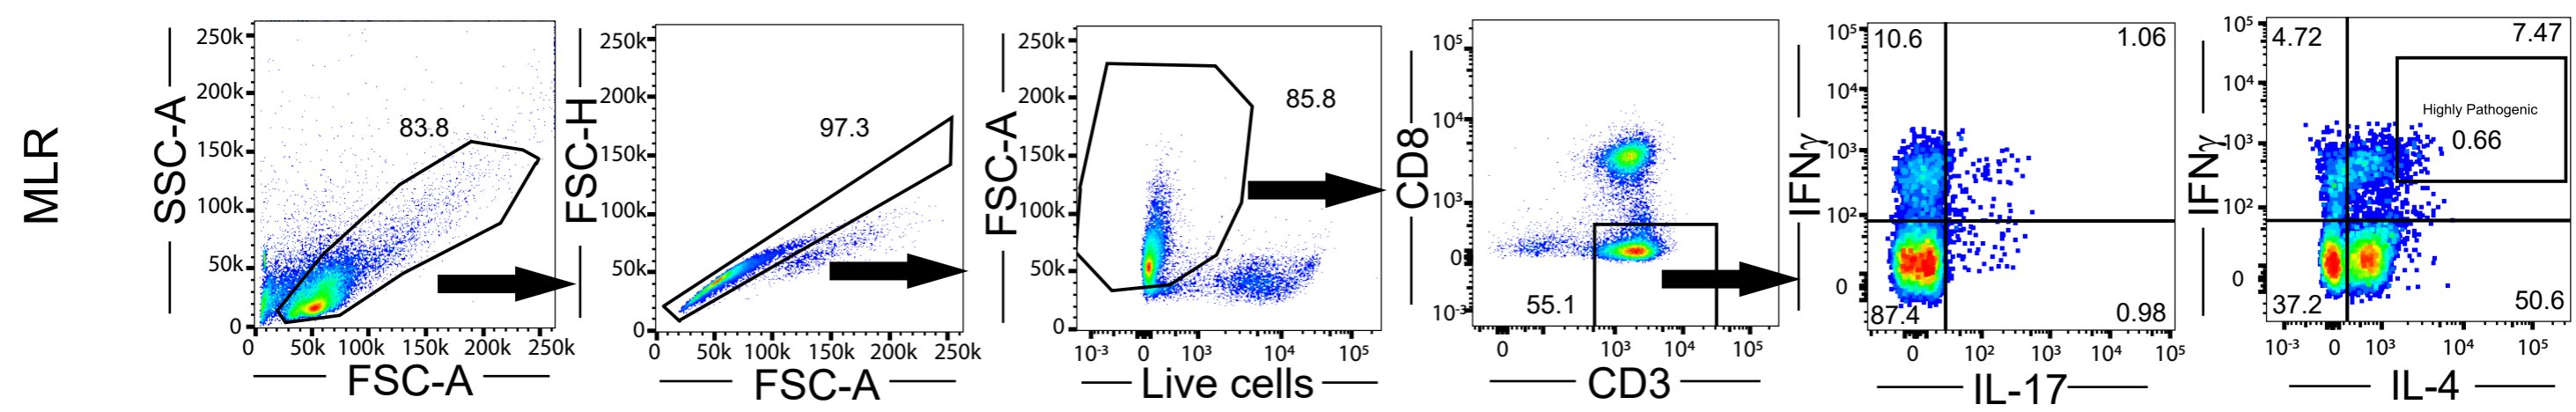

B

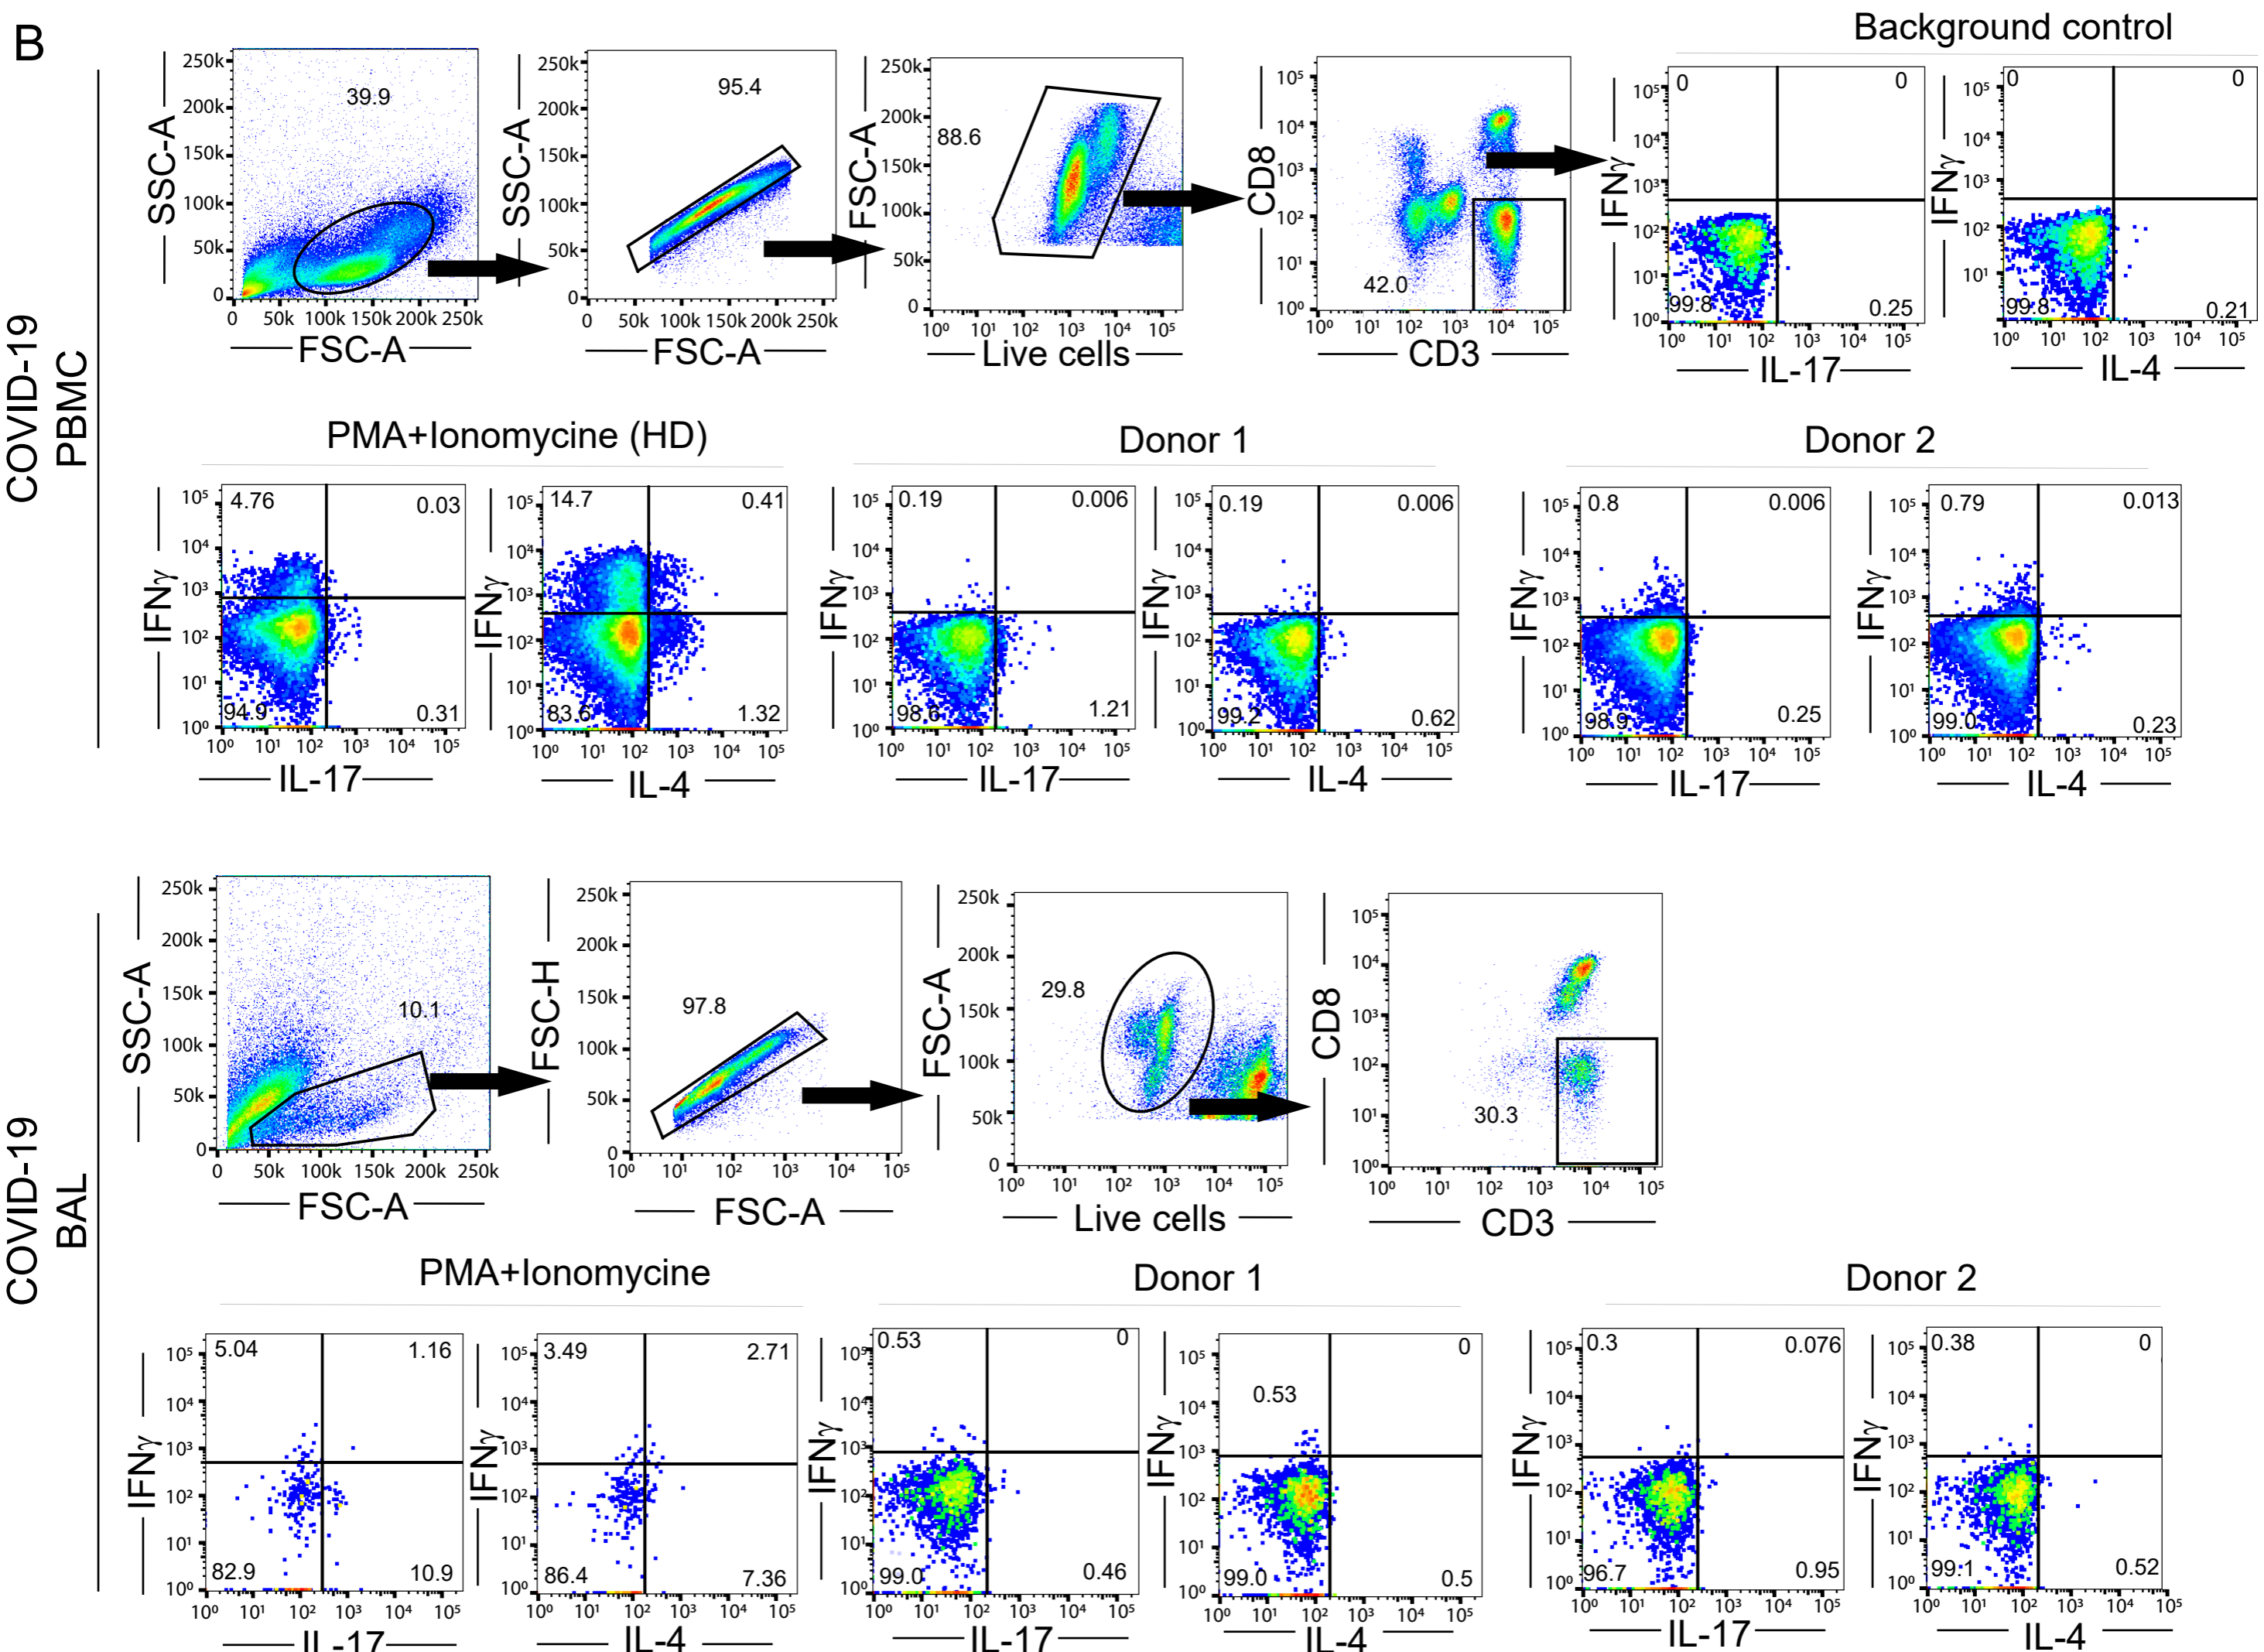

C

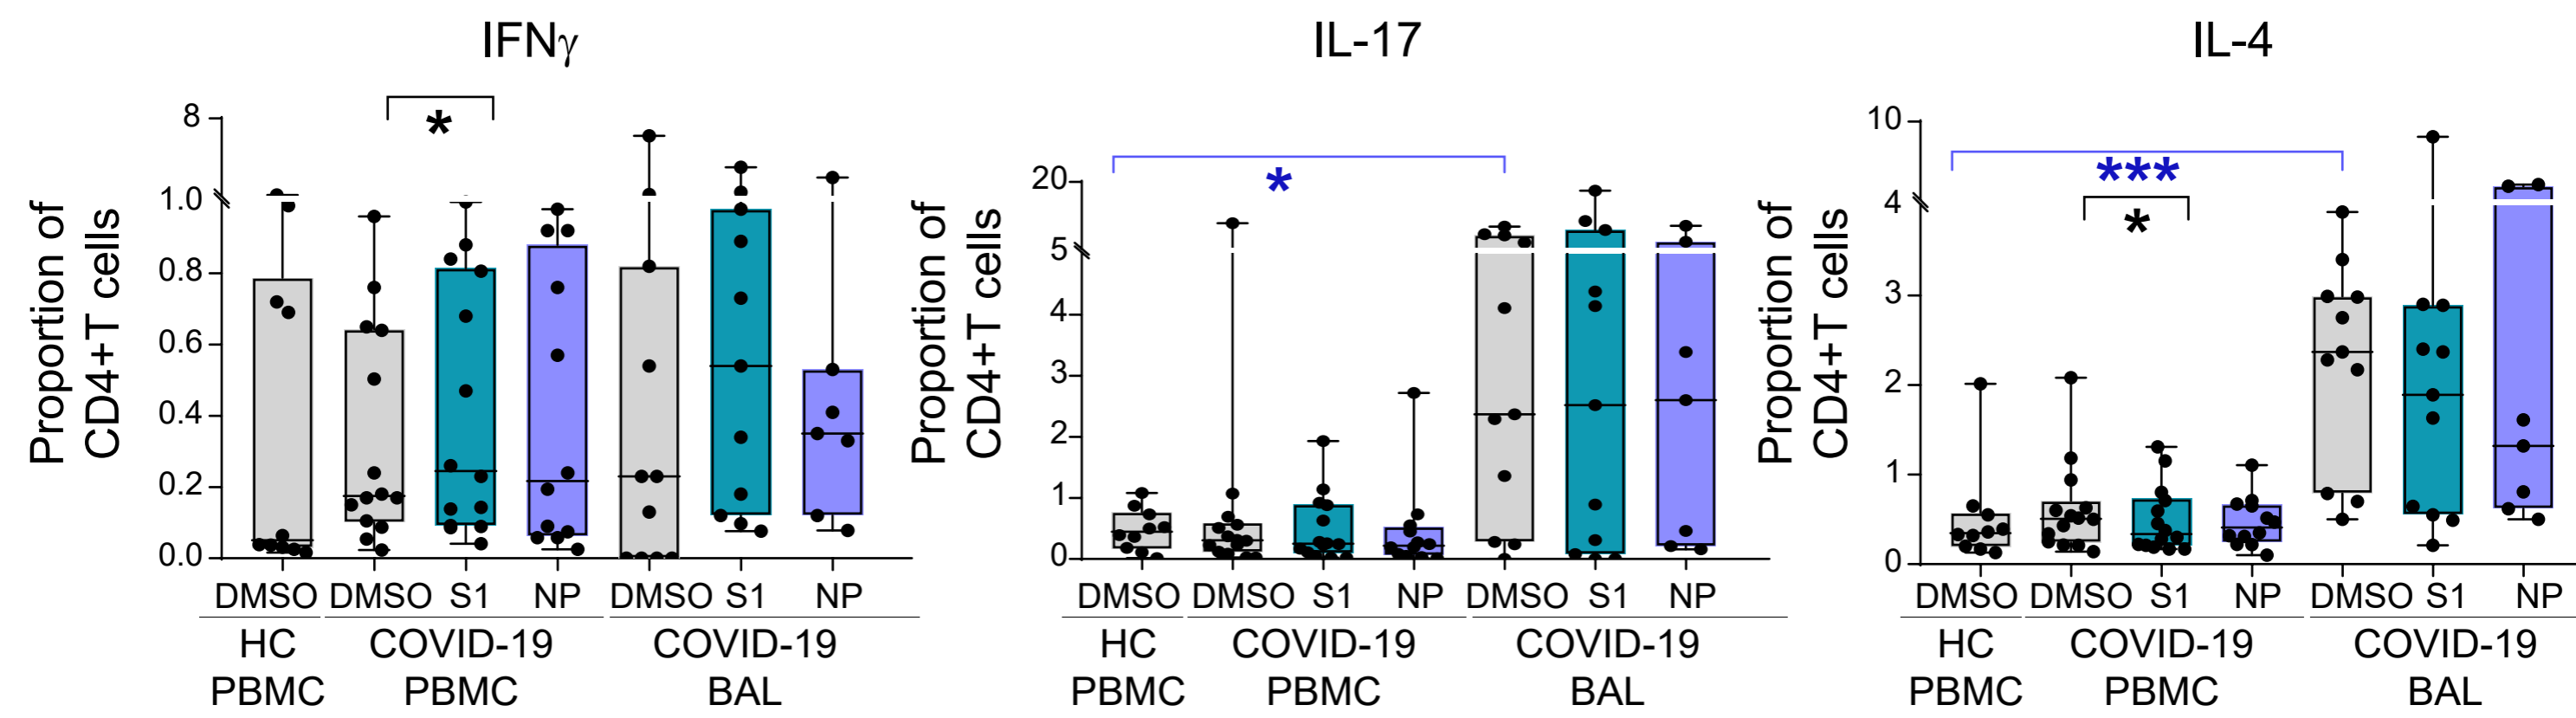

D

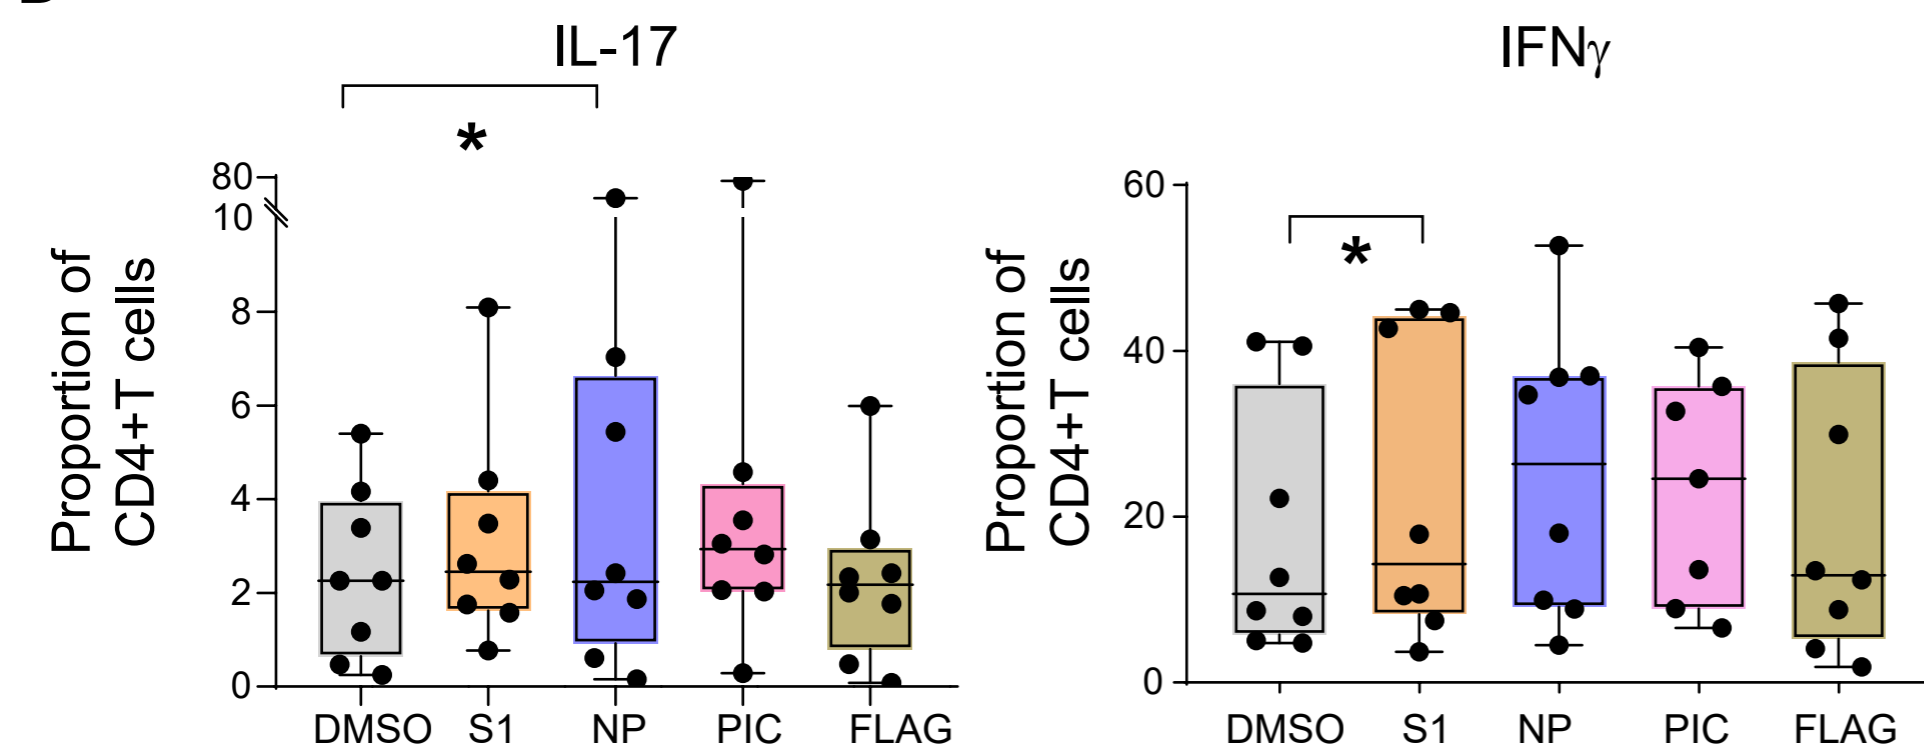

E

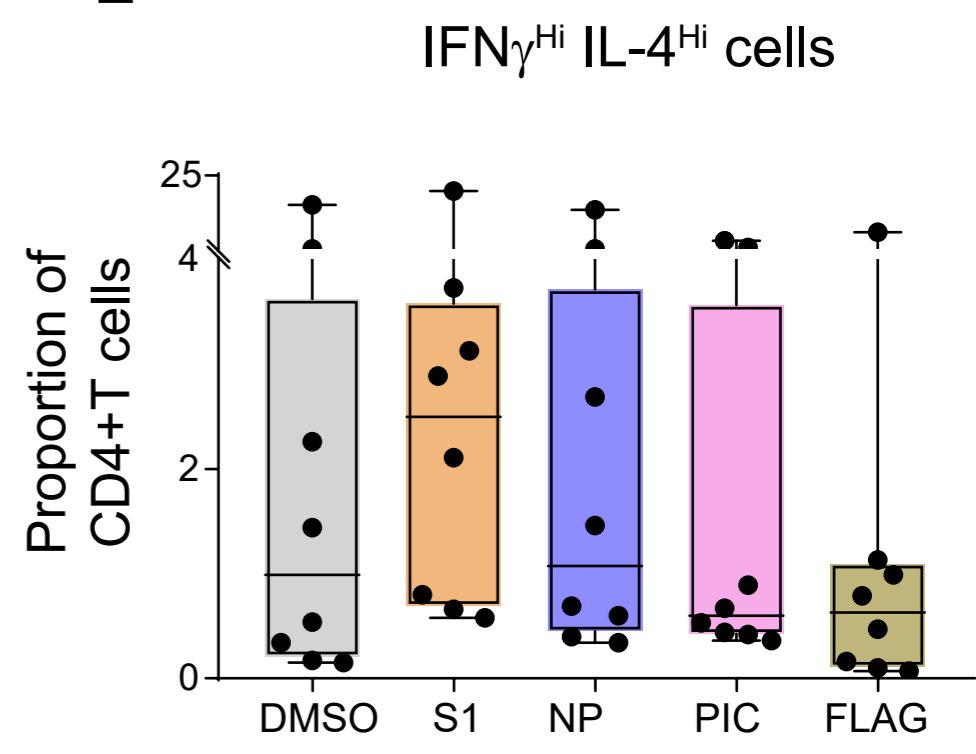

**Supplemental Figure 5. CD4<sup>+</sup> T cell responses induced by primed Mo and specifically induced in COVID-19 PBMC and BAL after stimulation with SARS-CoV-2 S1 and NP proteins.** (A, B): Representative flow cytometry gating strategy defining CD4<sup>+</sup> T cells and expression IFN $\gamma$ , IL-17 and IL-4 in MLR assays (A) and in PBMC and BAL from COVID-19 patients (B). Positive controls with PMA and Ionomycin are shown as well as representative examples from selected patients. Background controls are also included (C): Expression of IFN $\gamma$ , IL-17 and IL-4 on CD4<sup>+</sup> T cells from PBMC of healthy donors (n=10) and COVID-19 (n=14) and from COVID-19 BAL (n=11) samples at baseline and after stimulation with S1 (green) and NP (purple) peptides. Baseline levels from PBMCs obtained from healthy donors cultured in DMSO (grey) are included for comparison purposes. (D, E): Proportions of IL17<sup>+</sup>, IFN $\gamma$ <sup>+</sup> (D) and cells co-expressing high levels of IFN $\gamma$  and IL-4 (E) in CD4<sup>+</sup> T cells from MLR assays performed with Mo exposed to DMSO (grey) or S1 (orange), NP (purple), Poly I:C (PIC; pink), Flagellin (FLAG, khaki) (n=8). Mann-Whitney test was used to compare samples from different study cohorts. Statistical significances between different experimental conditions within the same groups were calculated using a two-tailed Wilcoxon matched pairs test \*p<0.05, \*\*\*p<0.001. Data are represented as box and whiskers with bars representing maximum and minimum values and with median highlighted as a line.



# Supplemental figure 6

## A

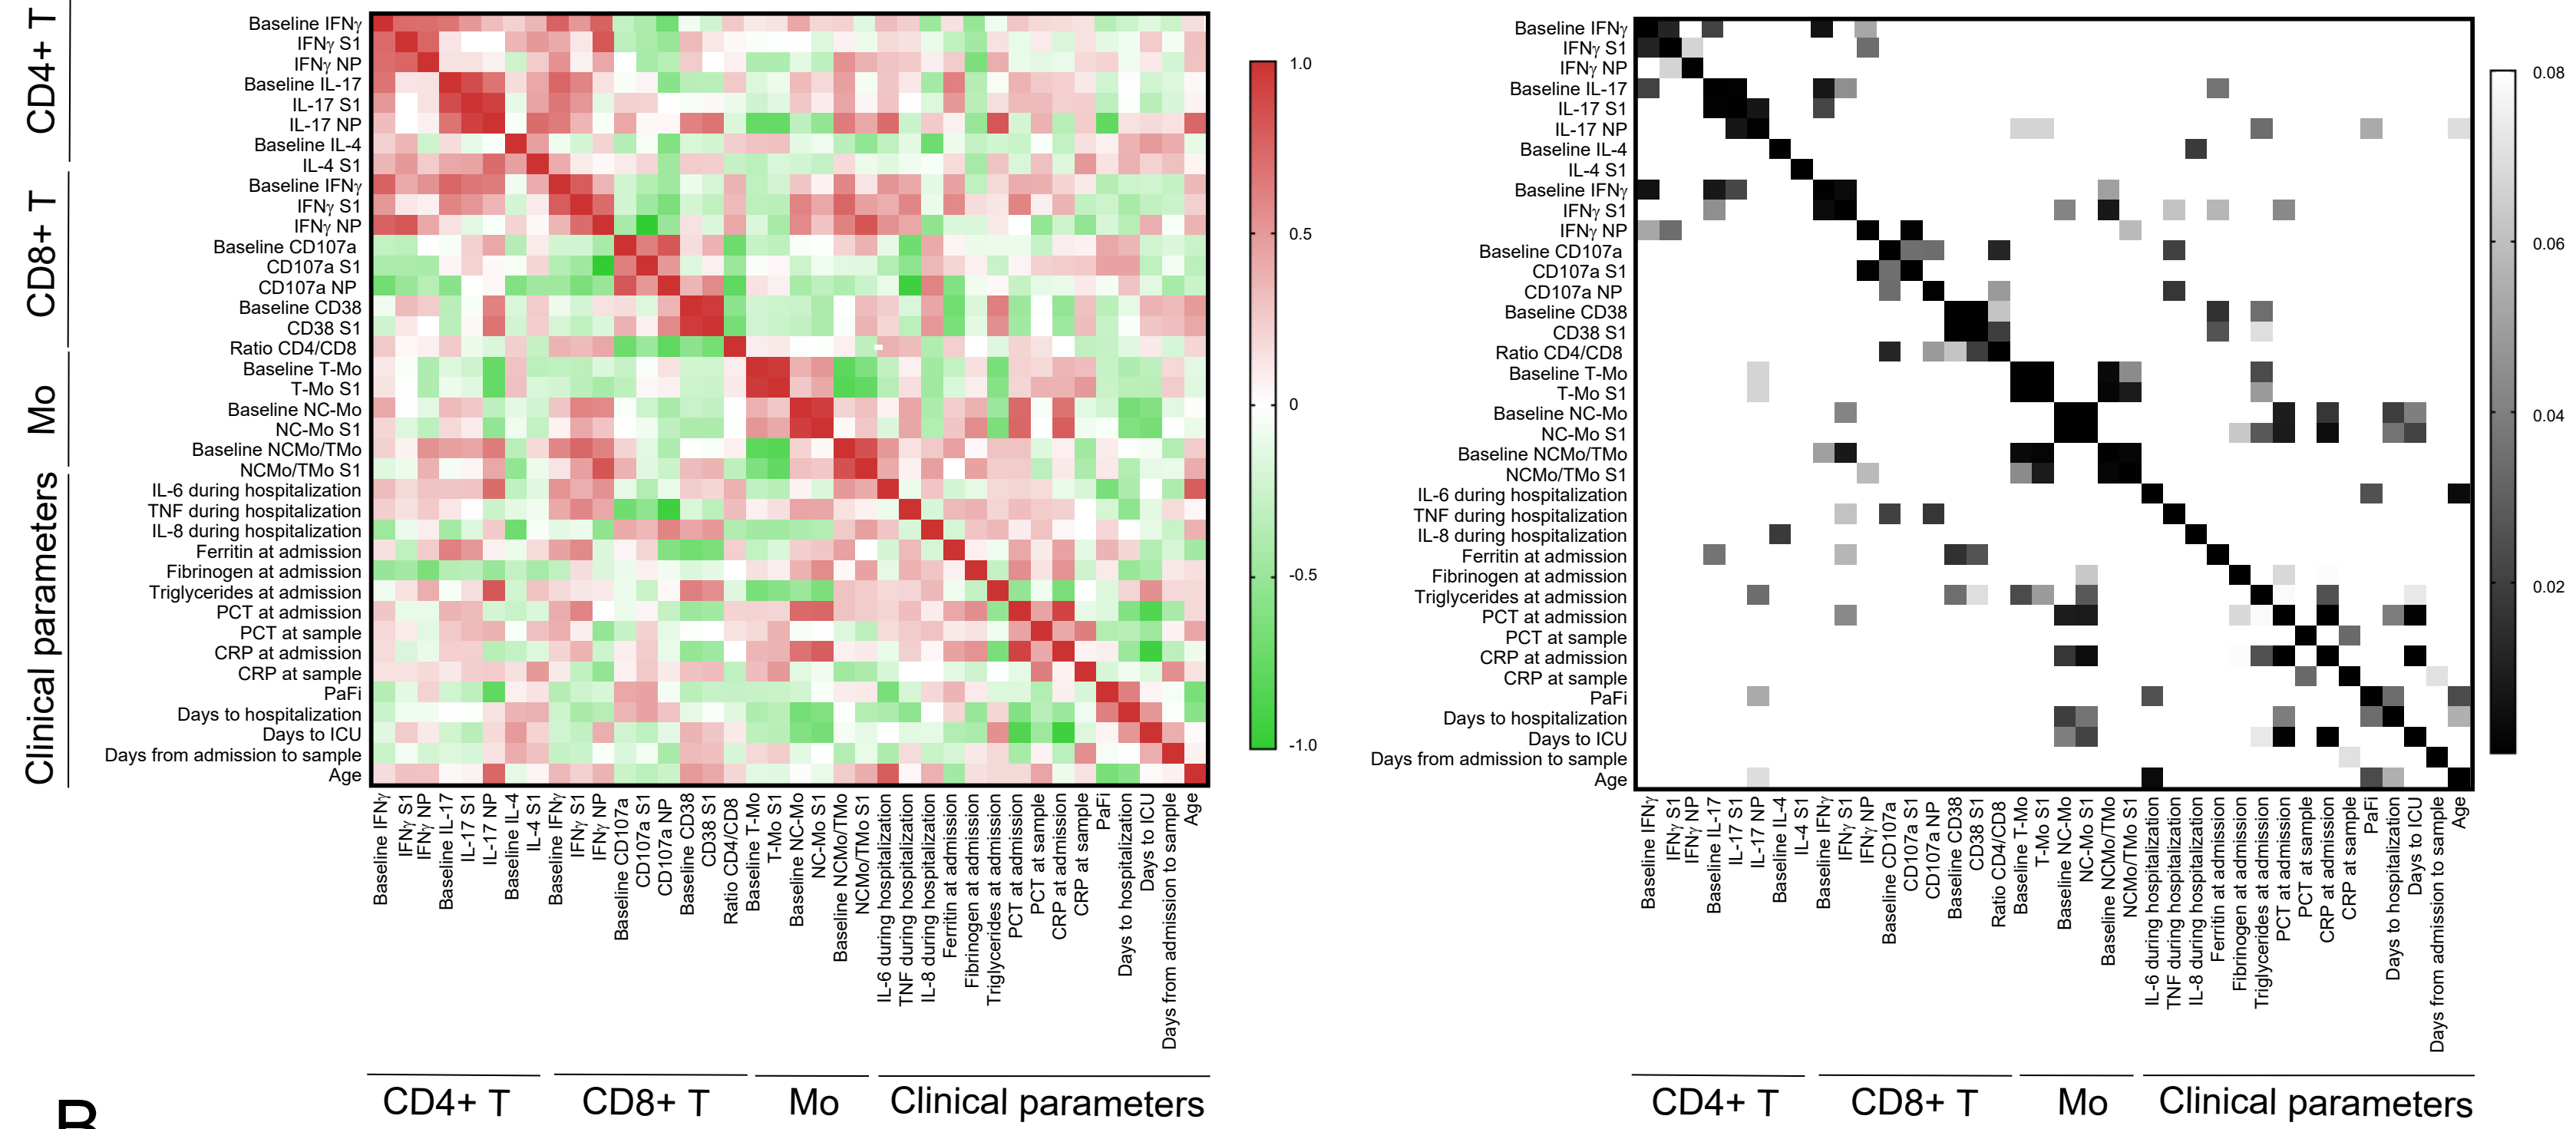

## B

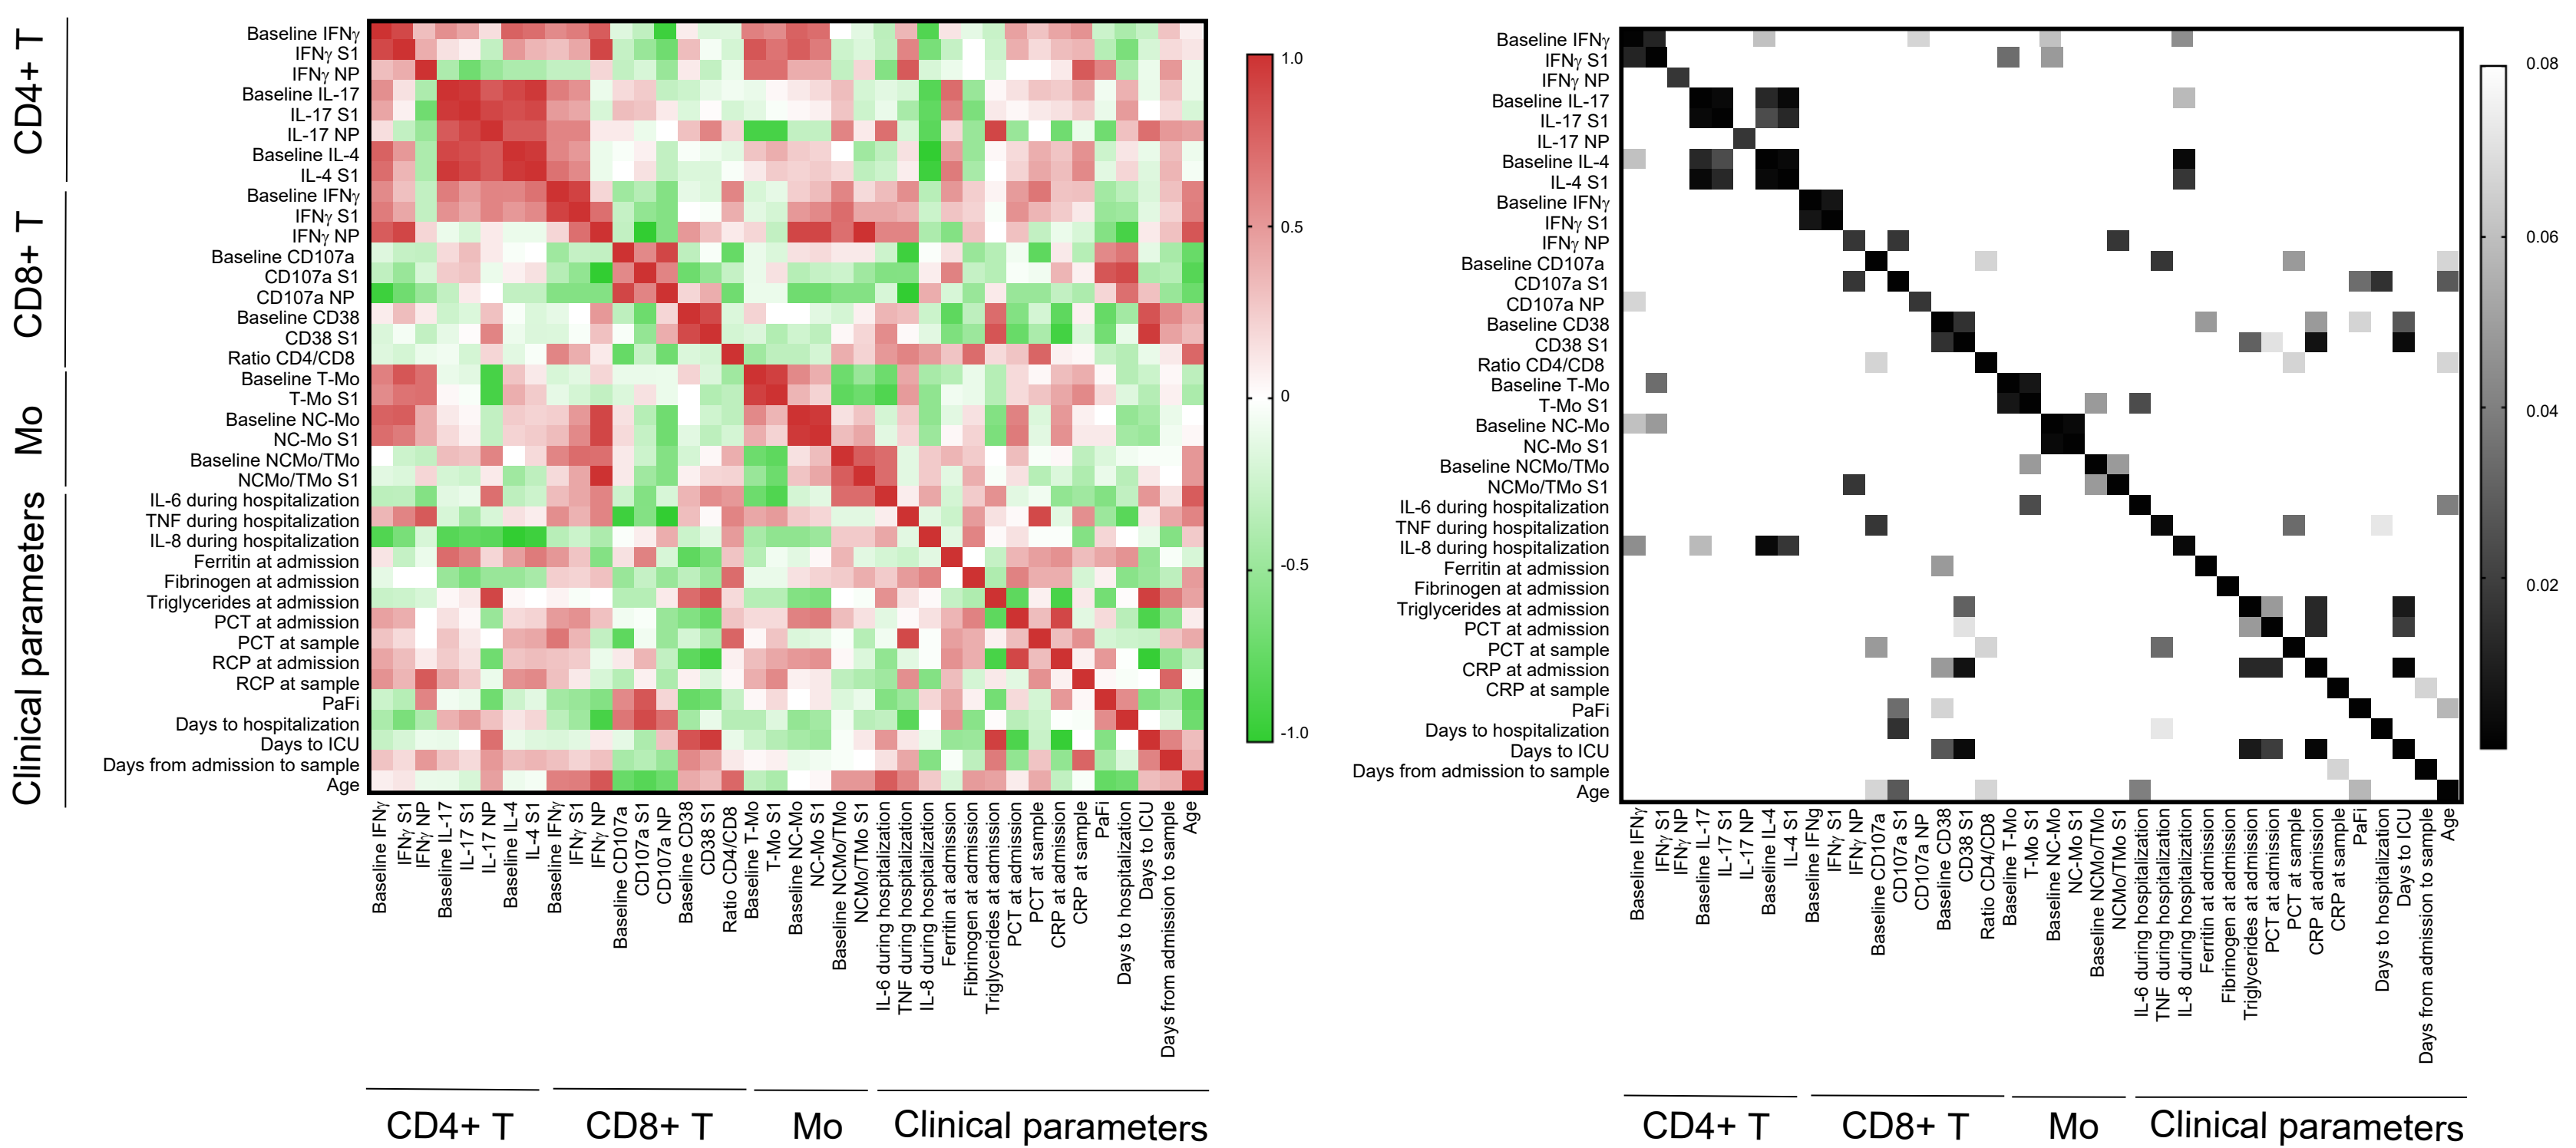

## C

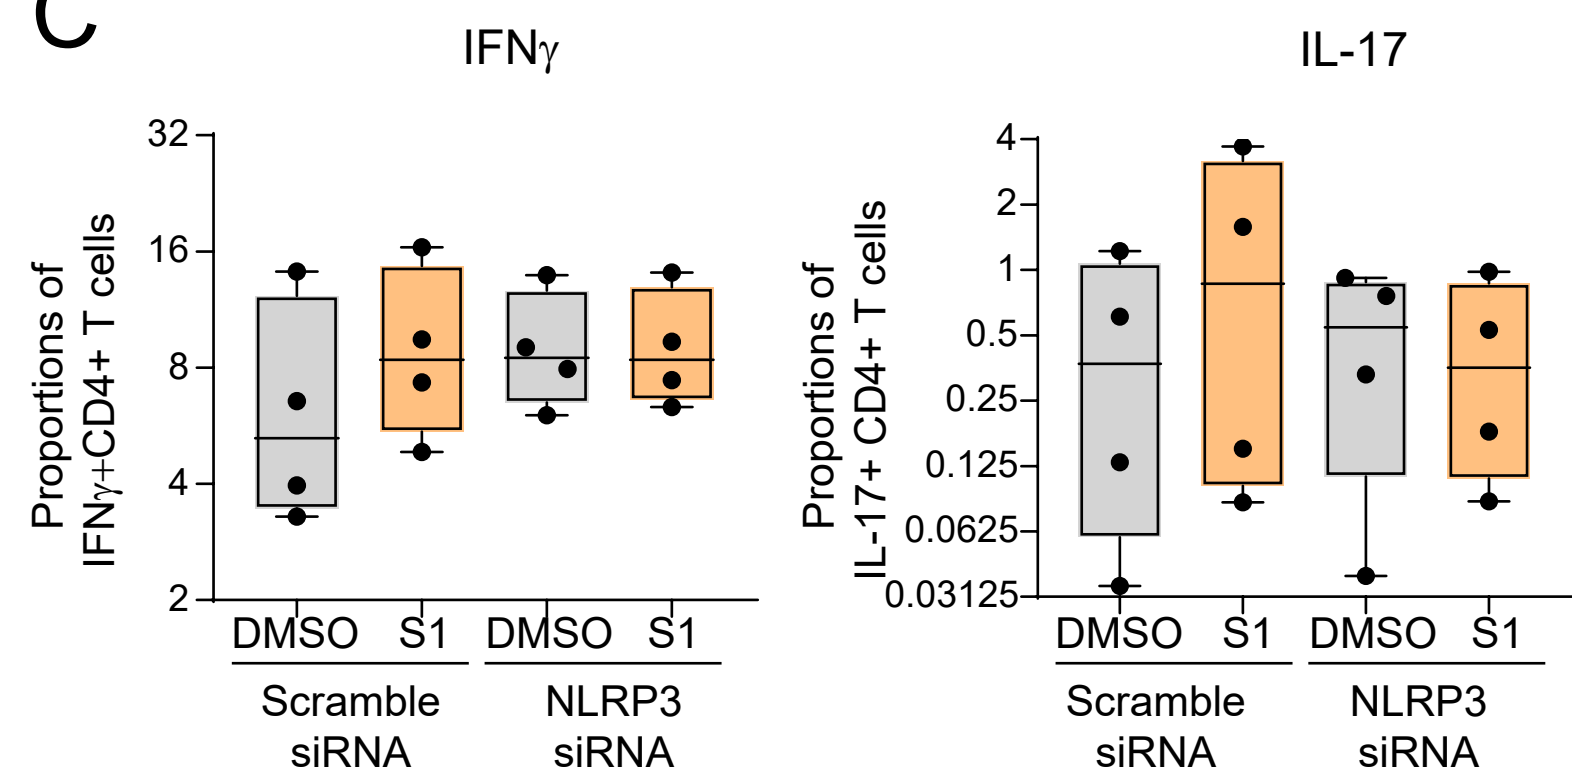

## D

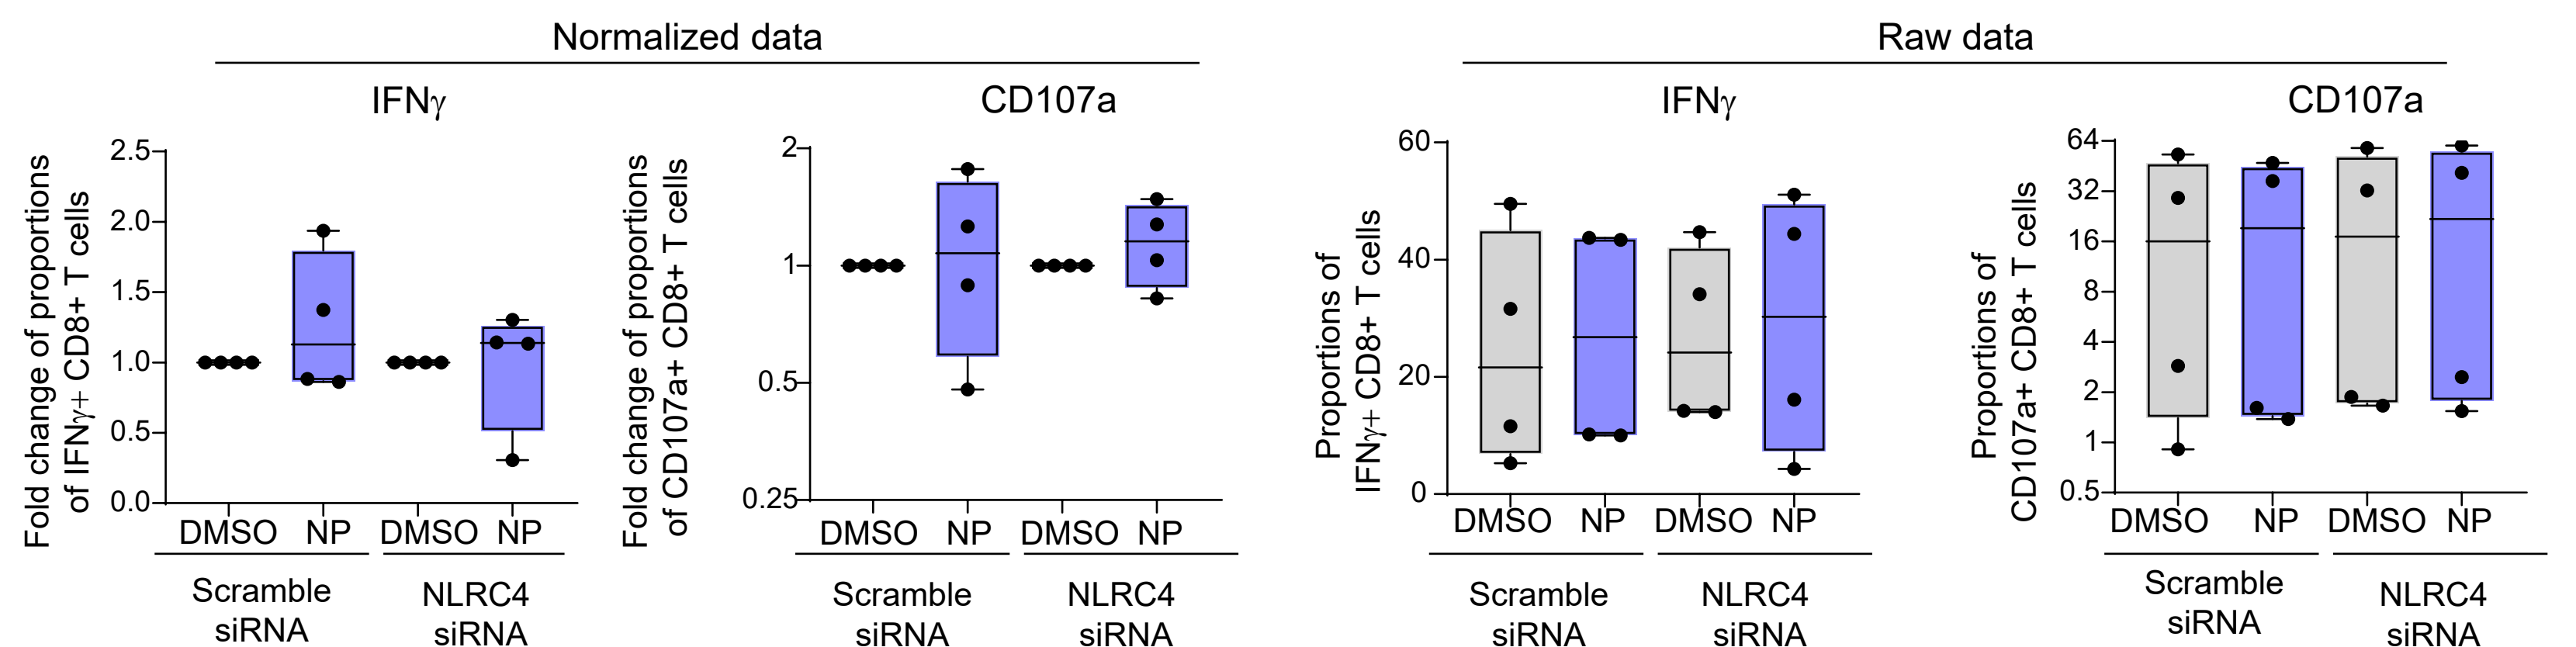

**Supplemental Figure 6. Correlation networks between Mo, T cell and clinical patterns in BAL from critical COVID-19 patients. (A, B):** Heatmaps showing Spearman correlation networks of the indicated Mo subsets, CD4+ and CD8+ T cell responses present at baseline or after SARS-CoV-2 peptide stimulation in all BAL samples from COVID-19 patients tested (A) n=12 or exclusively those in which IL-17 induction was observed in response to SARS-CoV-2 S1 or NP peptide stimulation (B) n=7. Heatmaps of the left show colors representing positive (red) or negative (green) R values of association. Heatmaps on the right show levels of statistical significance for the same corresponding networks. (C, D) Proportions of IFN $\gamma$ + (left, C and D) and IL-17+ (C) or CD107a+ (D) (right) CD4+ and CD8+ T cells after culture with allogeneic Mo treated with either Scramble, NLRP3 or NLRP4 specific siRNAs and in the absence (DMSO) or presence of S1 (orange) or NP (purple) stimulation (n=4). Data are represented as box and whiskers with bars representing maximum and minimum values and with median highlighted as a line.

|                                                          |                 |
|----------------------------------------------------------|-----------------|
| <b>Number of PB samples</b>                              | n=17            |
| <b>Age median (min-max)</b>                              | 69 (44-78)      |
| <b>Sex male n (%)</b>                                    | 12 (71)         |
| <b>Days since symptoms to admission median (min-max)</b> | 4.5 (0-25)      |
| <b>Days since admission to sample median (min-max)</b>   | 26 (5-47)       |
| <b>Days since admission to ICU median (min-max)</b>      | 6 (0-19)        |
| <b>Admission to ICU n (%)</b>                            | 17 (100)        |
| <b>Comorbidities n (%)</b>                               |                 |
| Arterial hypertension                                    | 9 (53)          |
| Diabetes mellitus                                        | 5 (29)          |
| Dyslipidemia                                             | 7 (41)          |
| Lung disease                                             | 1 (6)           |
| <b>Analytics parameters median (min-max)</b>             |                 |
| PaFiO <sub>2</sub> (PaO <sub>2</sub> /FiO <sub>2</sub> ) | 146 (60-367)    |
| <b>PCT at sample collection (ng/ml)</b>                  | 0.3 (0.06-2.87) |
| <b>PCT at admission (ng/ml)</b>                          | 0.16 (0.07-1)   |
| Lymphocytes miles/mm <sup>3</sup>                        | 850 (420-5450)  |
| LDH (U/L)                                                | 288 (145-548)   |
| D-DIMER (µg/ml)                                          | 2.2 (1.33-14.7) |
| <b>CRP at sample collection (mg/dl)</b>                  | 9 (0.13-20.8)   |
| CRP at admission (mg/dl)                                 | 7.3 (3.4-24)    |
| GGT (U/l)                                                | 201.5 (25-473)  |
| Glucose (mg/dl)                                          | 152 (87-207)    |
| Ferritin at admission (ng/ml)                            | 712 (114-2733)  |
| Triglycerides at admission (mg/dl)                       | 271 (43-674)    |
| Fibrinogen at admission (mg/dl)                          | 641 (389-1152)  |
| IL-6 (pg/ml)                                             | 31 (2-56)       |
| <b>Exitus n (%)</b>                                      | 7 (41)          |
| <b>Superinfection n (%)</b>                              |                 |
| Bacterial                                                | 8 (47)          |
| Fungal                                                   | 7 (41)          |
| Both                                                     | 5 (29)          |
| <b>Treatment n (%)</b>                                   |                 |
| Antibiotics                                              | 11 (65)         |
| Glucocorticoids                                          | 13 (76)         |
| Biologics                                                | 6 (35)          |
| Antiviral                                                | 0 (0)           |

**Supplemental table 1.** Peripheral blood samples from COVID-19 patients used in the study.

|                                                          |                  |  |
|----------------------------------------------------------|------------------|--|
| <b>Number of Samples</b>                                 | N=17             |  |
| <b>Age median (min-max)</b>                              | 69 (44-78)       |  |
| <b>Sex male n (%)</b>                                    | 12 (71)          |  |
| <b>Days since symptoms to admission median (min-max)</b> | 4.5 (0-25)       |  |
| <b>Days since admission to sample median (min-max)</b>   | 26 (5-47)        |  |
| <b>Days since admission to ICU median (min-max)</b>      | 6 (0-19)         |  |
| <b>Admission to ICU n (%)</b>                            | 17 (100)         |  |
| <b>Comorbidities n (%)</b>                               |                  |  |
| Arterial hypertension                                    | 10 (59)          |  |
| Diabetes mellitus                                        | 6 (35)           |  |
| Dyslipidemia                                             | 11 (65)          |  |
| Lung disease                                             | 1 (6)            |  |
| <b>Analytics parameters median (min-max)</b>             |                  |  |
| PaFiO <sub>2</sub> (PaO <sub>2</sub> /FiO <sub>2</sub> ) | 158 (94.3-211.3) |  |
| <b>PCT at sample collection (ng/ml)</b>                  | 0.3 (0.09-1.68)  |  |
| <b>PCT at admission (ng/ml)</b>                          | 0.13 (0.04-1.01) |  |
| Lymphocytes miles/mm <sup>3</sup>                        | 780 (50-5450)    |  |
| LDH (U/L)                                                | 284 (145-426)    |  |
| D-DIMER (µg/ml)                                          | 2.07 (1.09-14.7) |  |
| <b>CRP at sample collection (mg/dl)</b>                  | 9.6 (0.81-20.78) |  |
| CRP at admission (mg/dl)                                 | 7.3 (3.4-24)     |  |
| GGT (U/l)                                                | 131 (25-473)     |  |
| Glucose (mg/dl)                                          | 153 (92-207)     |  |
| Ferritin at admission (ng/ml)                            | 934 (313-2733)   |  |
| Triglycerides at admission (mg/dl)                       | 137 (43-451)     |  |
| Fibrinogen at admission (mg/dl)                          | 688 (540-952)    |  |
| IL-6 (pg/ml)                                             | 27.65 (2-56)     |  |
| <b>Exitus n (%)</b>                                      | 7 (41)           |  |
| <b>Superinfection n (%)</b>                              |                  |  |
| Bacterial                                                | 11<br>(65)       |  |
| Fungal                                                   | 7<br>(41)        |  |
| Both                                                     | 6<br>(35)        |  |
| <b>Treatment n (%)</b>                                   |                  |  |
| Antibiotics                                              | 12 (71)          |  |
| Glucocorticoids                                          | 17 (100)         |  |
| Biologics                                                | 6 (35)           |  |
| Antiviral                                                | 1 (6)            |  |

**Supplemental table 2.** Bronchoalveolar lavage samples from COVID-19 patients used in the study.



|                                              |            |
|----------------------------------------------|------------|
| <b>Number of Non-COVID-19 BAL samples</b>    | n=6        |
| <b>Age median (min-max)</b>                  | 69 (38-77) |
| <b>Pathologies</b>                           |            |
| <b>Cancer n (%)</b>                          | 3 (50)     |
| <b>Interstitial lung disease (ILD) n (%)</b> | 3 (50)     |

**Supplemental table 3.** Parameters of Non-COVID-19 patients whose BAL samples were used in the study

| Antibody | Fluorochrome     | Provider   | Dilution | Clone       | Ref.       |
|----------|------------------|------------|----------|-------------|------------|
| CD14     | PE               | BioLegend  | 1:50     | 63D3        | 367104     |
| CD14     | APC-Cy7          | BD         | 1:50     | MφP9        | 557831     |
| CD16     | PB               | BioLegend  | 1:50     | 3G8         | 302032     |
| CD40     | FITC             | BioLegend  | 1:50     | 5C3         | 334306     |
| CD86     | PeCy7            | BioLegend  | 1:50     | BU63        | 374210     |
| CD3      | PB               | Immunostep | 1:50     | 33-2A3      | 3CFB1-100T |
| CD107a   | APC              | BioLegend  | 1:300    | H4A3        | 328620     |
| CD107a   | BV510            | BioLegend  | 1:200    | H4A3        | 328631     |
| CD38     | PeCy7            | BioLegend  | 1:50     | HB-7        | 356608     |
| CD45     | V500             | BD         | 1:50     | HI30        | 560777     |
| CD1c     | PE               | BD         | 1:50     | F10/21A3    | 564900     |
| CD19     | PercP/Cyanine5.5 | BioLegend  | 1:50     | SJ25C1      | 363016     |
| CD56     | PercP/Cyanine5.5 | BioLegend  | 1:50     | 5.1H11      | 362506     |
| CD3      | PercP/Cyanine5.5 | BioLegend  | 1:50     | HIT3a       | 300328     |
| IL-1β    | FITC             | BioLegend  | 1:100    | H1b-98      | 511705     |
| HLA-DR   | APC              | BioLegend  | 1:50     | 3D12        | 342606     |
| IL-17    | PE               | BioLegend  | 1:100    | BL168       | 512306     |
| IL-17    | APC              | Invitrogen | 1:100    | eBio64DEC17 | 17-7179-42 |
| IL-4     | PE               | BD         | 1:30     | 340451      | 340451     |
| IL-4     | APC              | BD         | 1:100    | MP4-25D2    | 554486     |
| CXCR5    | PE               | BioLegend  | 1:50     | 42D1        | 338705     |
| CD8      | PercP            | BioLegend  | 1:50     | HIT8a       | 300922     |
| IFNγ     | BV605            | BioLegend  | 1:50     | B27         | 506542     |
| IFNγ     | FITC             | BD         | 1:100    | 4S.B3       | 554551     |
| CD103    | BV711            | BioLegend  | 1:50     | Ber-ACT8    | 350222     |

**Supplemental table 4.** List of antibodies used for Flow cytometry analysis in the study.



| <b>Specificity</b>            | <b>Species Origin</b> | <b>Reactivity</b> | <b>Provider</b> | <b>Clone</b> | <b>Ref.</b> |
|-------------------------------|-----------------------|-------------------|-----------------|--------------|-------------|
| <b>NLRC4</b>                  | Rabbit                | Human             | abcam           | Polyclonal   | ab115537    |
| <b>IFN<math>\gamma</math></b> | Rabbit                | Human             | abcam           | EPR21704     | ab231036    |
| <b>CD14</b>                   | Mouse                 | Human             | abcam           | 4B4F12       | ab182032    |
| <b>NLRP3</b>                  | Rabbit                | Human             | Cell Signaling  | D4D8T        | 15101       |
| <b>IL-17</b>                  | Goat                  | Human             | RyD Systems     | Polyclonal   | AF-317-SP   |
| <b>Caspase-1</b>              | Goat                  | Human             | RyD Systems     | Polyclonal   | AF6215      |
| <b>CD3</b>                    | Rabbit                | Human             | Dako            | F7.2.38      | M7254       |
| <b>IgG</b>                    | Donkey                | Rabbit            | Invitrogen      | Polyclonal   | A-21206     |
| <b>IgG</b>                    | Donkey                | Goat              | Invitrogen      | Polyclonal   | A-11057     |
| <b>IgG</b>                    | Donkey                | Mouse             | Invitrogen      | Polyclonal   | A-31571     |

**Supplemental Table 5.** List of antibodies used for Immunohistochemistry in the study.

|                   | Survivors (n=6)  | Exitus (n=6)   | p-value |
|-------------------|------------------|----------------|---------|
| NC Mo at baseline | 17.2 (11.1-22.4) | 7.8 (1.8-9.4)  | 0.05    |
| NC Mo after S1    | 30.3 (9.3-30.6)  | 9.8 (3.8-15.4) | 0.08    |
| NC Mo after NP    | 20.5 (12.8-25.6) | 5.5 (3.2-9.6)  | 0.02    |
| IL-4 at baseline  | 0.8 (0.7-2.4)    | 2.9 (2.3-3.4)  | 0.04    |

NC Mo: non-classical monocytes. NP: nucleoprotein.

Data are shown as median (interquartile range). Non-parametric Mann-Whitney tests were used to assess statistical significance.  $p < 0.05$  was considered as statistically significant.

|                       | No superinfection (n=5) | Bacterial superinfection (n=3) | Bacterial and fungal superinfection (n=4) | p-value | Post-hoc Dunn's test                              |
|-----------------------|-------------------------|--------------------------------|-------------------------------------------|---------|---------------------------------------------------|
| CD4 IL-17 at baseline | 2.4 (2.3-6.4)           | 0.2 (0-1.4)                    | 7.1 (5.1-9)                               | 0.03    | Bacterial and fungal > bacterial                  |
| CD4 IL-17 after S1    | 4.1 (2.5-4.4)           | 0 (0-0.1)                      | 10.1 (5-14.6)                             | 0.02    | fungal > bacterial; no superinfection > bacterial |
| CD4 IL-17 after NP    | 2.6 (0.2-3.4)           | 0.3 (0.2-0.5)                  | 8.2 (6.3-10)                              | 0.1     | _____                                             |

NP: nucleoprotein.

Data are shown as median (interquartile range). Non-parametric Kruskal-Wallis tests followed by post-hoc Dunn's tests were used to assess statistical significance.  $p < 0.05$  was considered as statistically significant.

**Supplemental Table 6.** Statistical analysis of COVID-19 patients distribution based on survival and bacterial or fungal superinfection.



Molecular weight control: BlueStar Plus  
Prestained Protein Marker (Nippon Genetics)

### Chemiluminescence+Marker

DMSO S1 NP PIC FLAG

75 kDa  
63 kDa

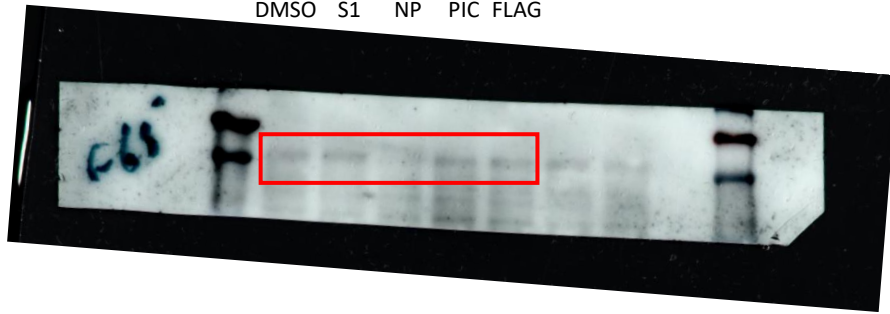

DMSO S1 NP PIC FLAG

75 kDa  
63 kDa

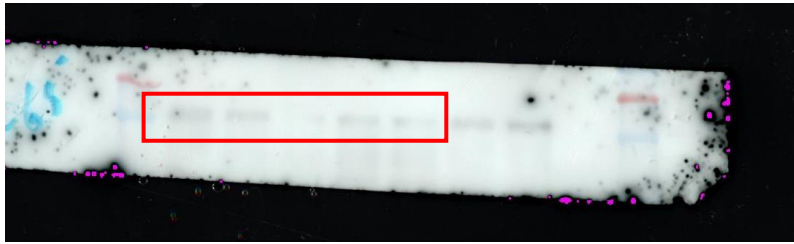

DMSO S1 NP PIC FLAG

48 kDa  
35 kDa  
25 kDa  
20 kDa  
17 kDa  
11 kDa

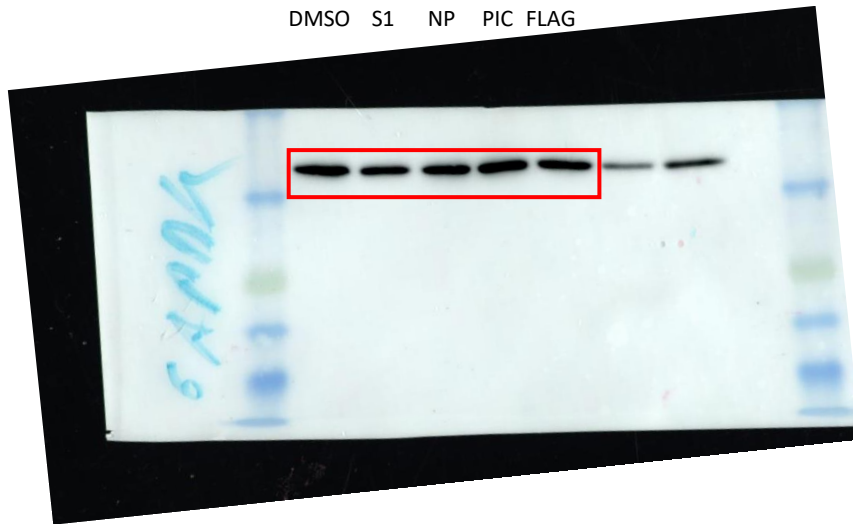

### Chemiluminescence

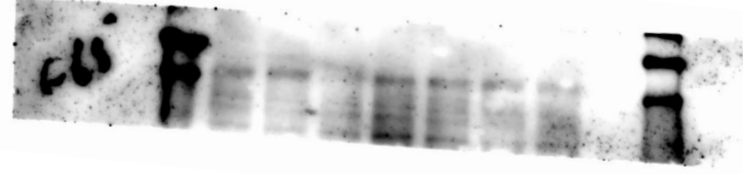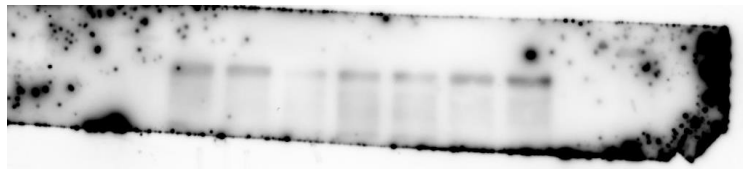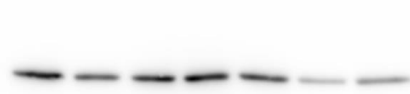

Phosphorylated p65, total p65 and  
GAPDH included in Main figure 2B  
analysis

Phosphorylated p65 (65 kDa)  
(Cell Signaling 3039)

Total p65 (65 kDa)  
(Abcam E379; ab32536)

GAPDH (35 kDa)  
(FF26A/F9 BioLegend)

### Chemiluminescence+Marker

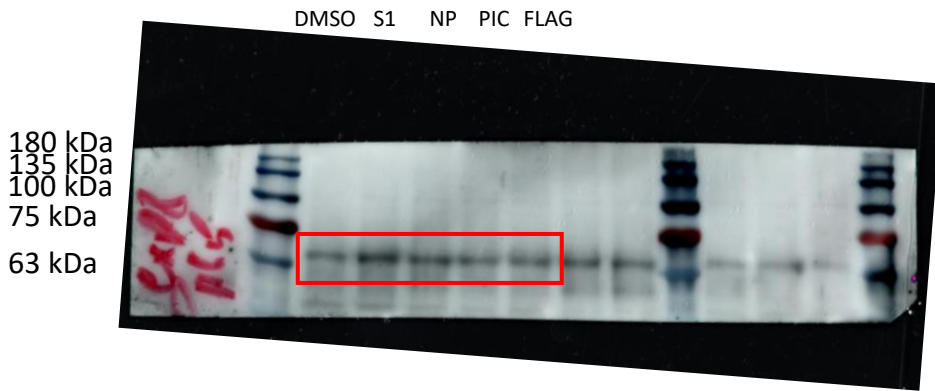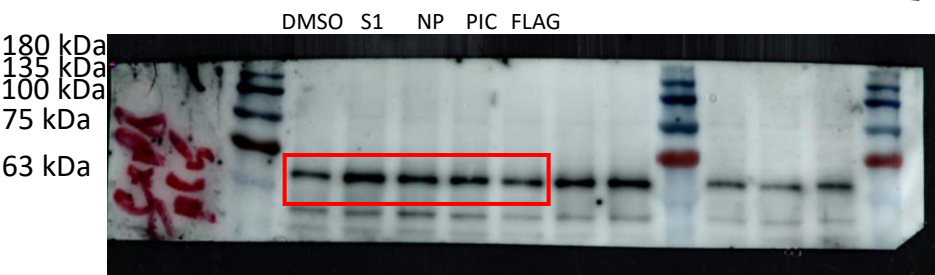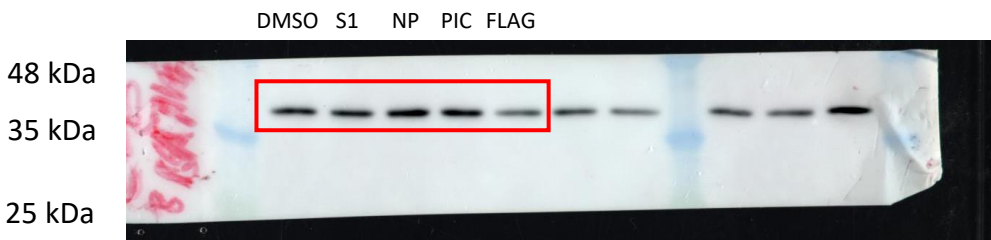

### Chemiluminescence

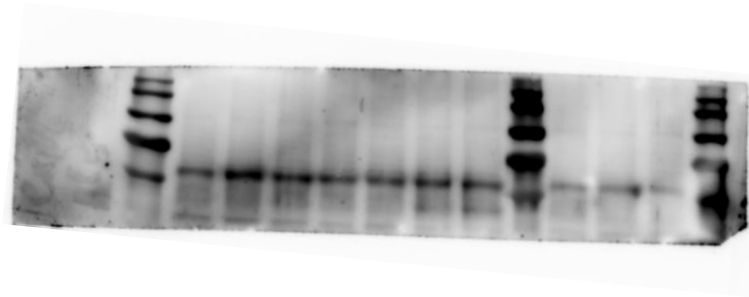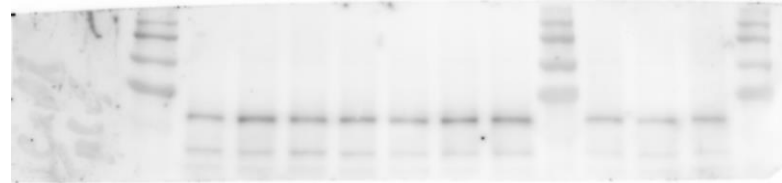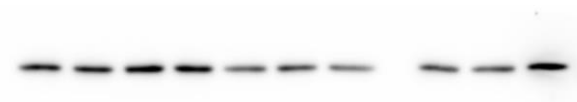

Phosphorylated p65, total p65 and GAPDH included in Main figure 2B analysis

Phosphorylated p65 (65 kDa)  
(Cell Signaling 3039)

Total p65 (65 kDa)  
(Abcam E379; ab32536)

GAPDH (35 kDa)  
(FF26A/F9 BioLegend)



### Chemiluminescence+Marker

DMSO S1 NP PIC FLAG

180 kDa  
135 kDa  
100 kDa  
75 kDa  
63 kDa

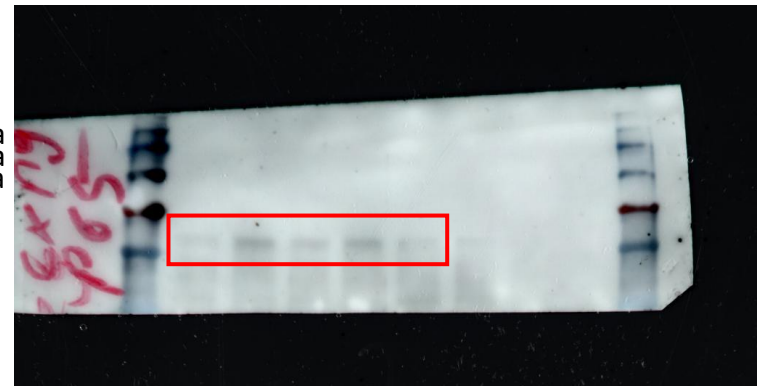

### Chemiluminescence

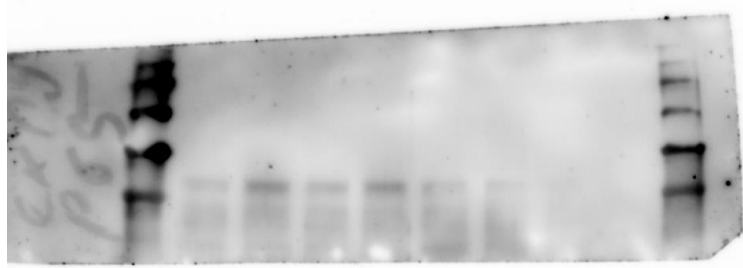

Phosphorylated p65, total p65 and GAPDH included in Main figure 2B analysis

Phosphorylated p65 (65 kDa)  
(Cell Signaling 3039)

DMSO S1 NP PIC FLAG

180 kDa  
135 kDa  
100 kDa  
75 kDa  
63 kDa

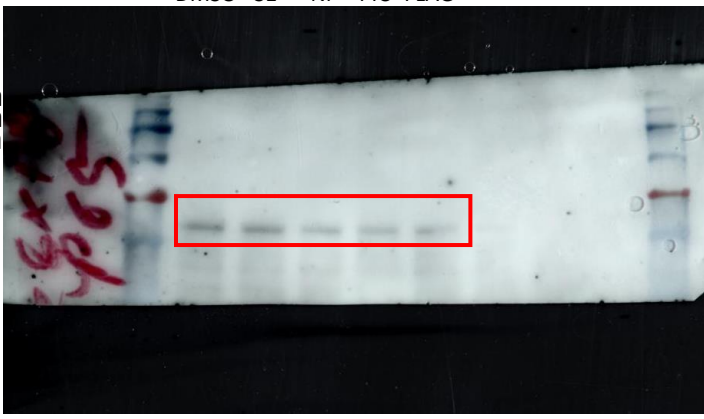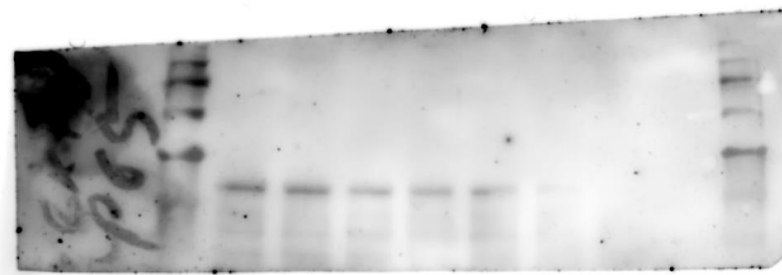

Total p65 (65 kDa)  
(Abcam E379; ab32536)

DMSO S1 NP PIC FLAG

48 kDa  
35 kDa  
25 kDa

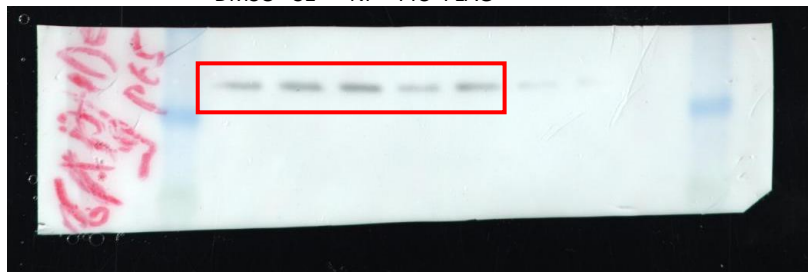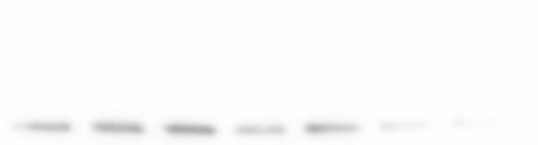

GAPDH (35 kDa)  
(FF26A/F9 BioLegend)

### Chemiluminescence+Marker

DMSO S1 NP PIC FLAG DMSO S1 NP PIC FLAG

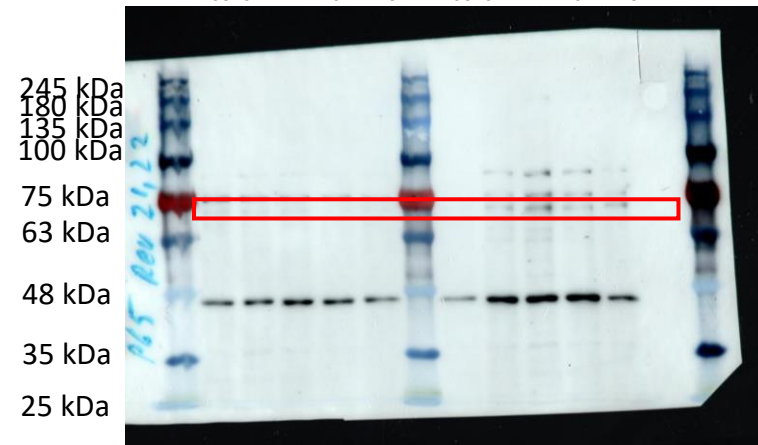

DMSO S1 NP PIC FLAG DMSO S1 NP PIC FLAG

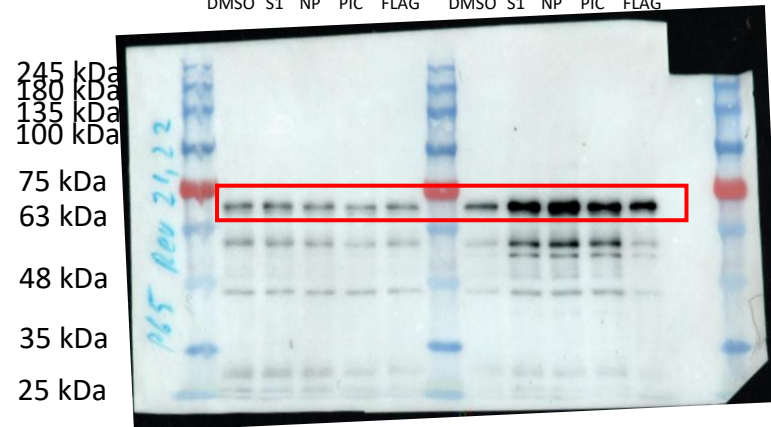

DMSO S1 NP PIC FLAG DMSO S1 NP PIC FLAG

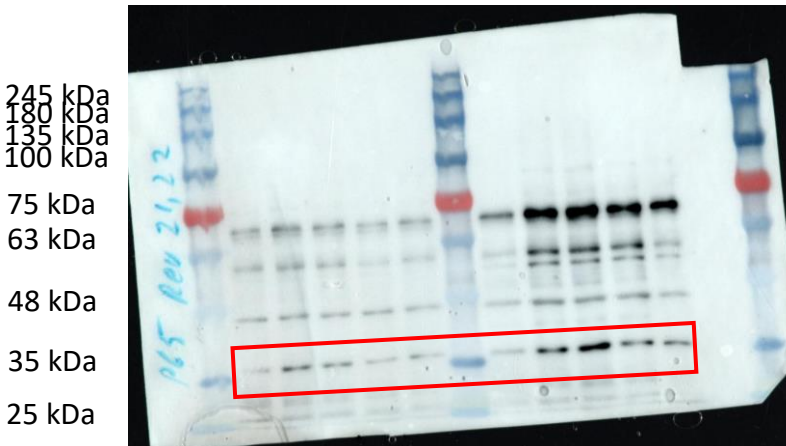

### Chemiluminescence

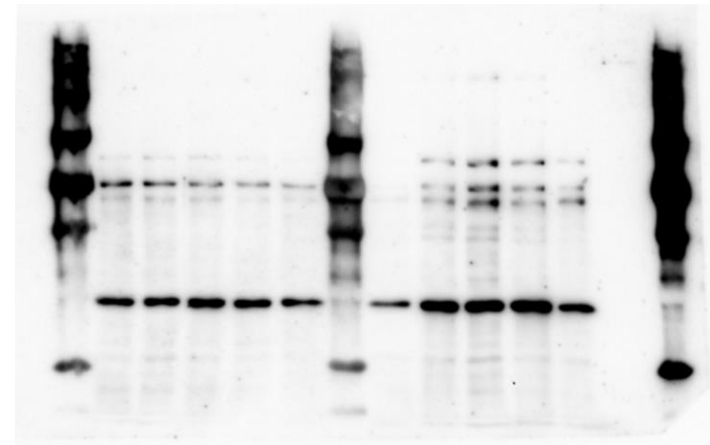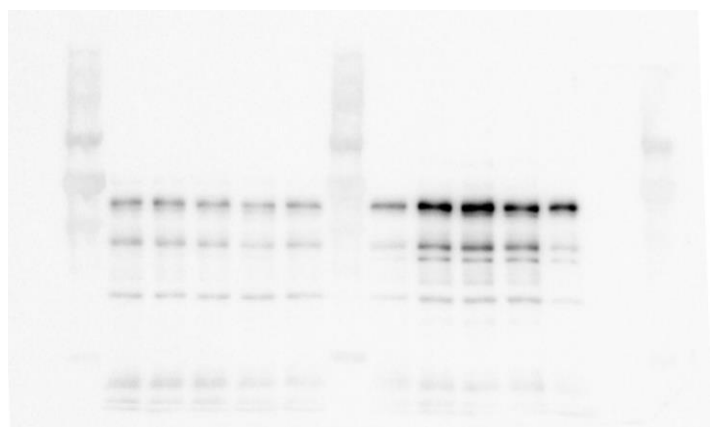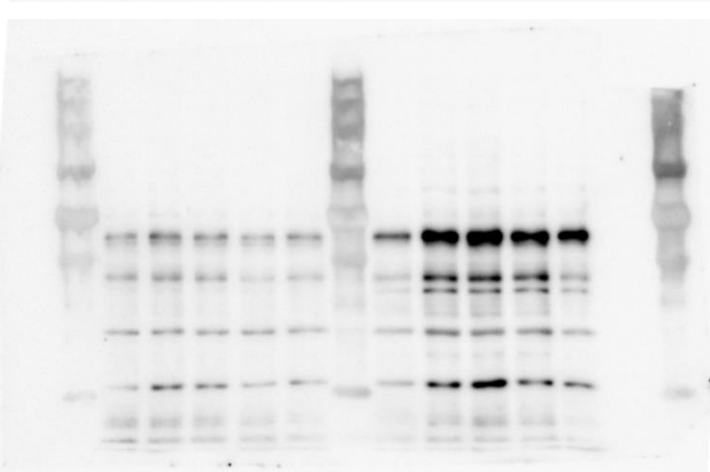

Phosphorylated p65, total p65 and GAPDH included in Main figure 2B analysis

Phosphorylated p65 (65 kDa)  
(Cell Signaling 3039)

Total p65 (65 kDa)  
(Abcam E379; ab32536)

GAPDH (35 kDa)  
(FF26A/F9 BioLegend)

### Chemiluminescence+Marker

S1 DMSO

180 kDa  
135 kDa  
100 kDa  
75 kDa  
63 kDa  
48 kDa

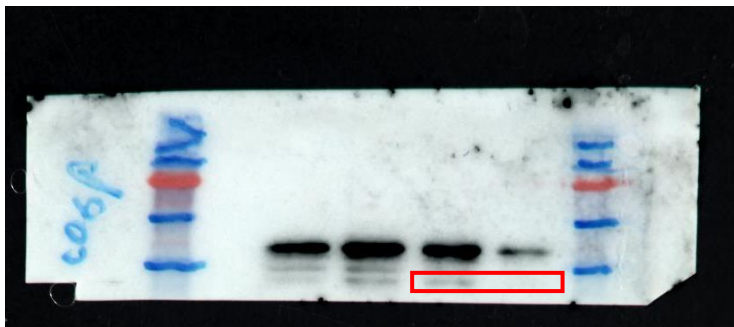

### Chemiluminescence

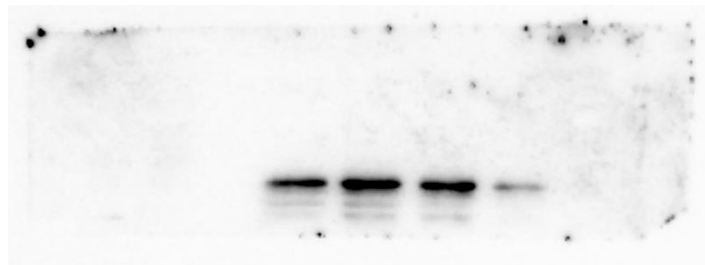

Caspase-1 and GAPDH included in  
Main figure 2C analysis

Cleaved Caspase-1  
(52 kDa) (AF6215;  
R&D Systems)

S1 DMSO

35 kDa  
25 kDa  
20 kDa  
17 kDa  
11 kDa

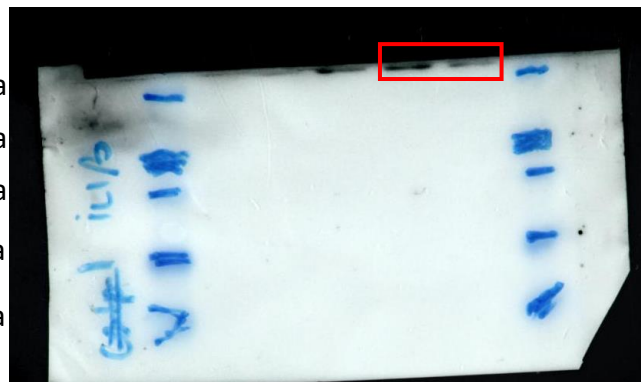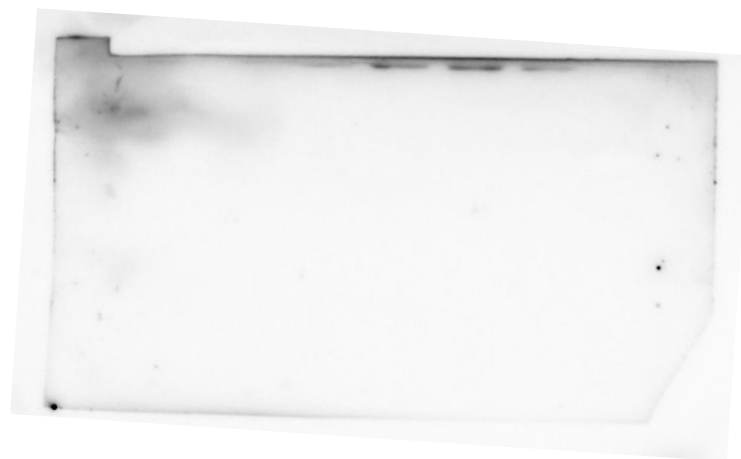

GAPDH (35 kDa)  
(FF26A/F9 BioLegend)



# Chemiluminescence+Marker

DMSO S1 NP PIC FLAG

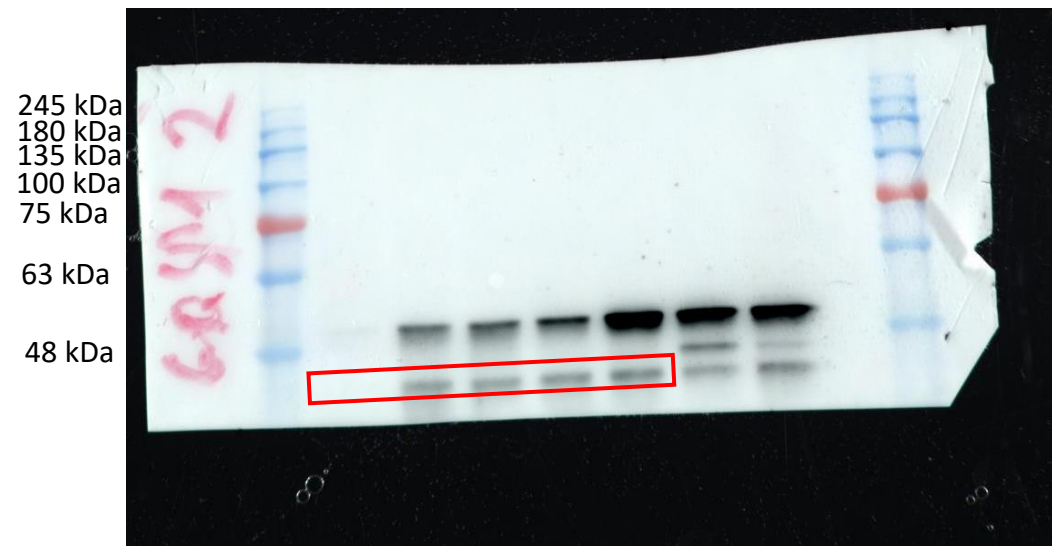

DMSO S1 NP PIC FLAG

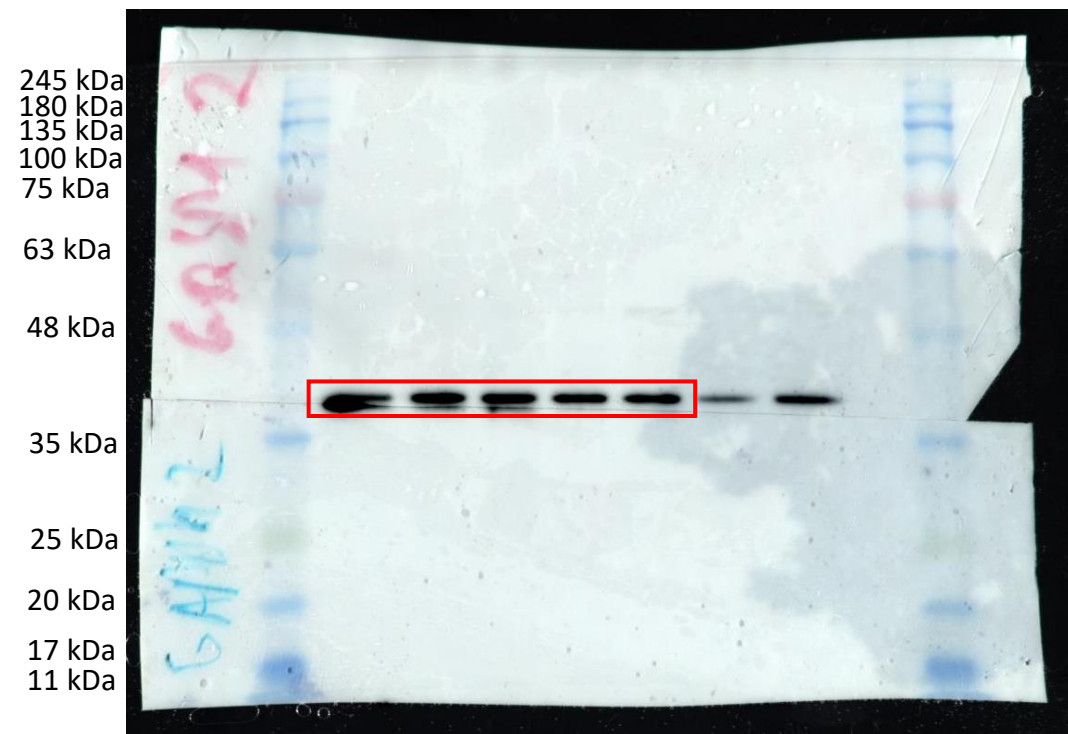

# Chemiluminescence

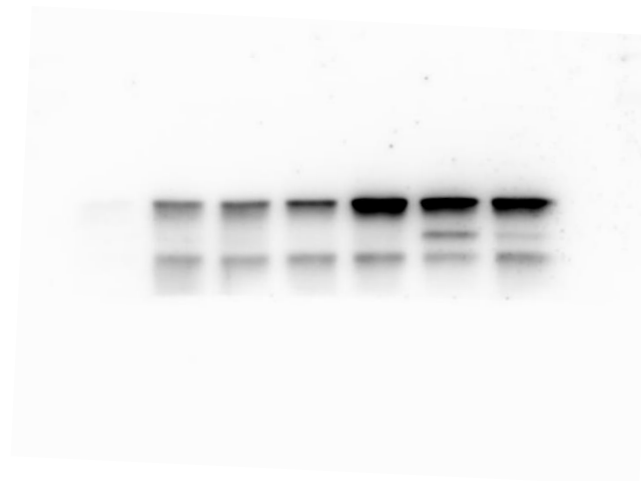

Caspase-1 and GAPDH included in Main figure 2C analysis

Cleaved Caspase-1 (52 kDa) (AF6215; R&D Systems)

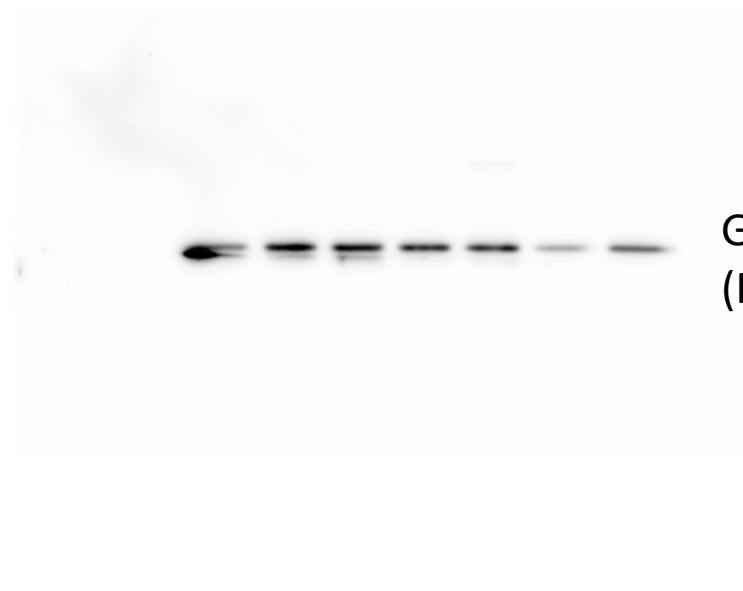

GAPDH (35 kDa) (FF26A/F9 BioLegend)

### Chemiluminescence+Marker

DMSO S1 NP PIC FLAG

180 kDa  
135 kDa  
100 kDa  
75 kDa  
63 kDa  
48 kDa

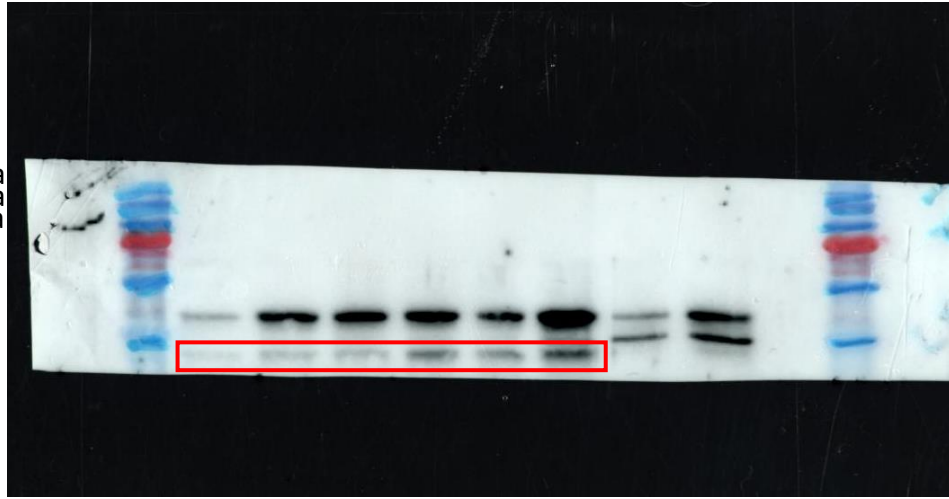

### Chemiluminescence

Caspase-1 and GAPDH included in Main figure 2C analysis

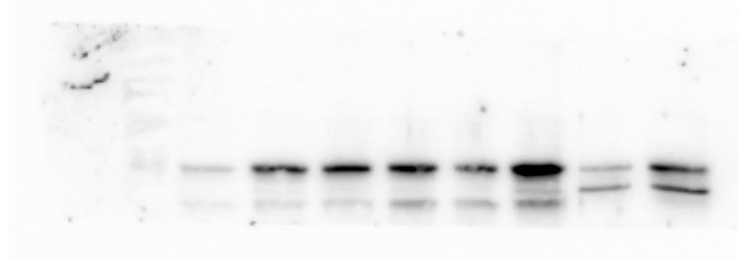

Cleaved Caspase-1 (52 kDa) (AF6215; R&D Systems)

DMSO S1 NP PIC FLAG

35 kDa  
25 kDa  
20 kDa  
17 kDa  
11 kDa

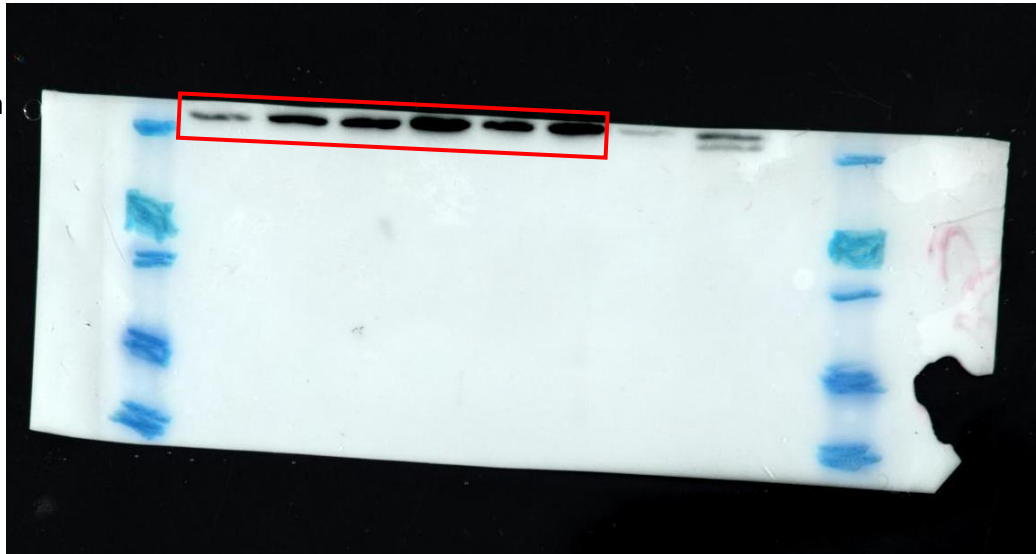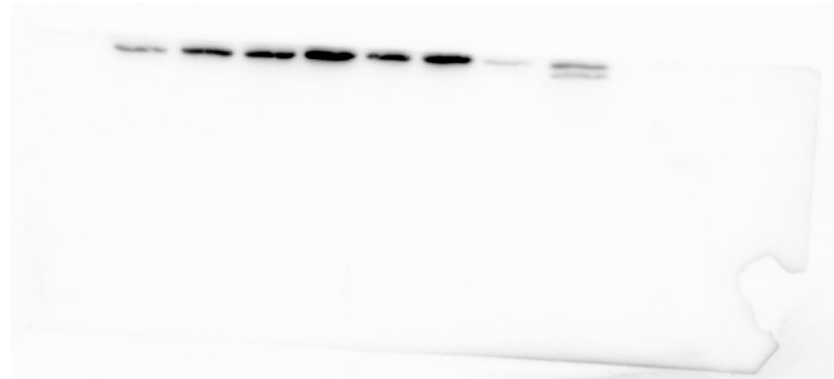

GAPDH (35 kDa) (FF26A/F9 BioLegend)

### Chemiluminescence+Marker

DMSO S1 NP PIC FLAG

180 kDa  
135 kDa  
100 kDa  
75 kDa  
63 kDa  
48 kDa

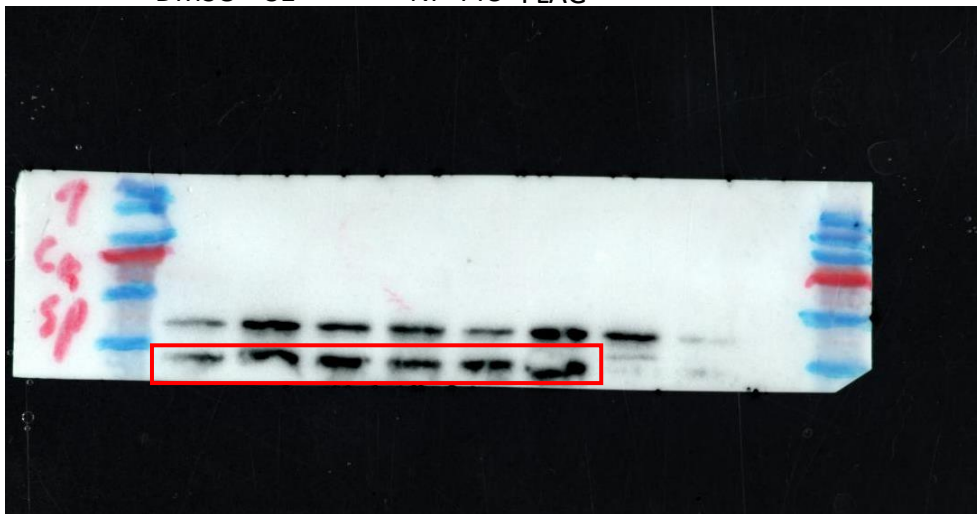

### Chemiluminescence

Caspase-1 and GAPDH included in  
Main figure 2C analysis

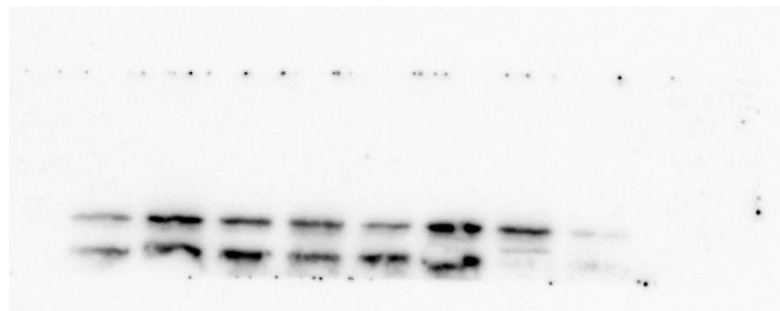

Cleaved Caspase-1  
(52 kDa) (AF6215;  
R&D Systems)

DMSO S1 NP PIC FLAG

35 kDa  
25 kDa  
20 kDa  
17 kDa  
11 kDa

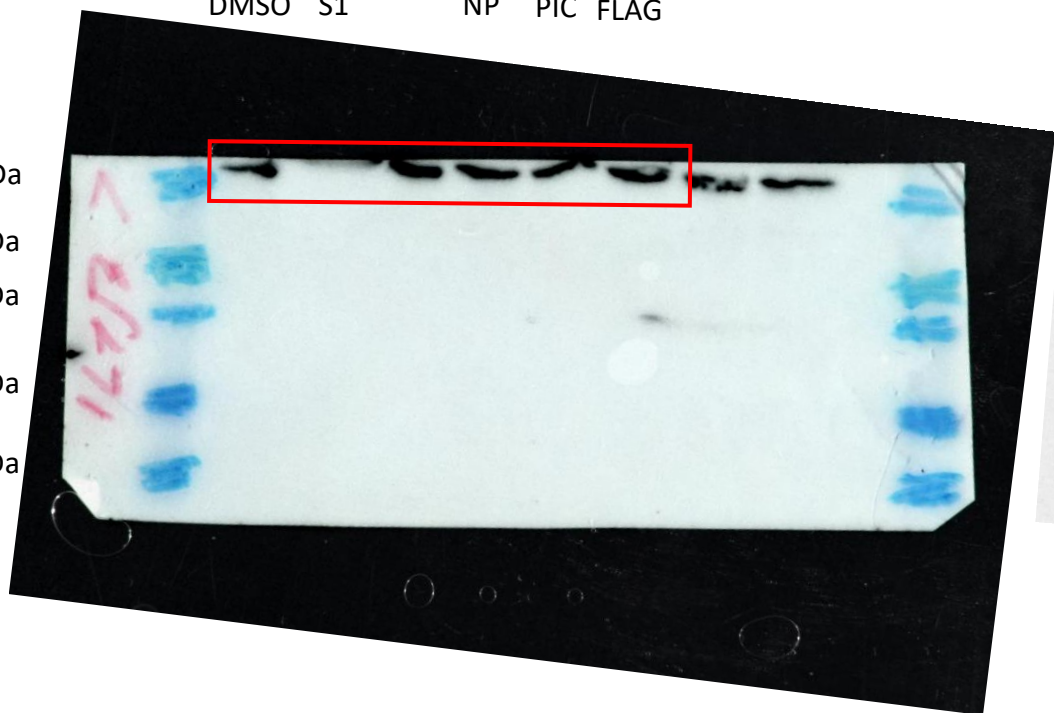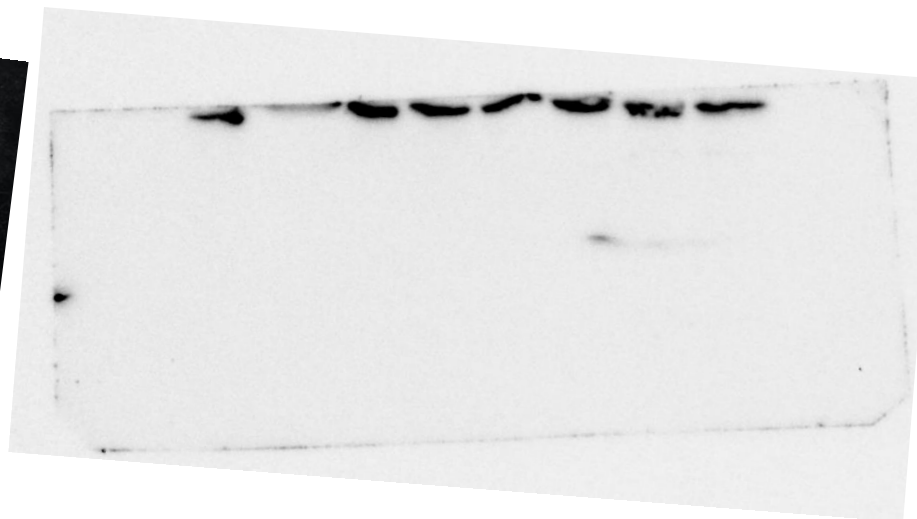

GAPDH (35 kDa)  
(FF26A/F9 BioLegend)



### Chemiluminescence+Marker

DMSO S1 NP PIC FLAG

245 kDa  
180 kDa  
135 kDa  
100 kDa  
75 kDa  
63 kDa  
48 kDa  
35 kDa  
25 kDa  
20 kDa  
17 kDa  
11 kDa

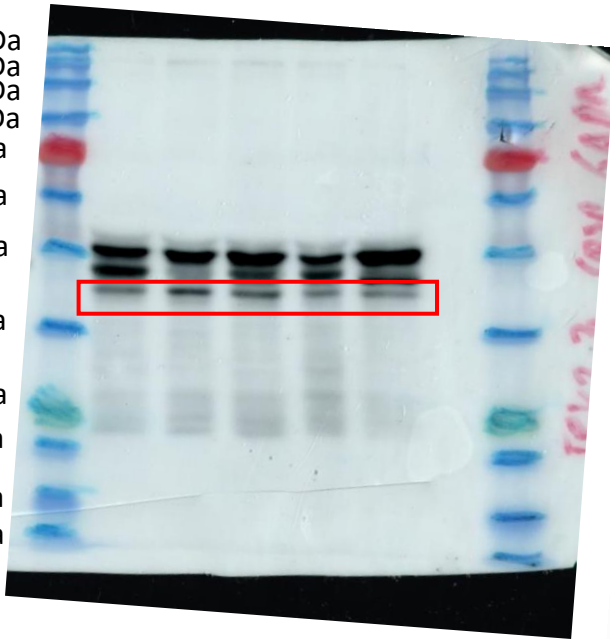

### Chemiluminescence

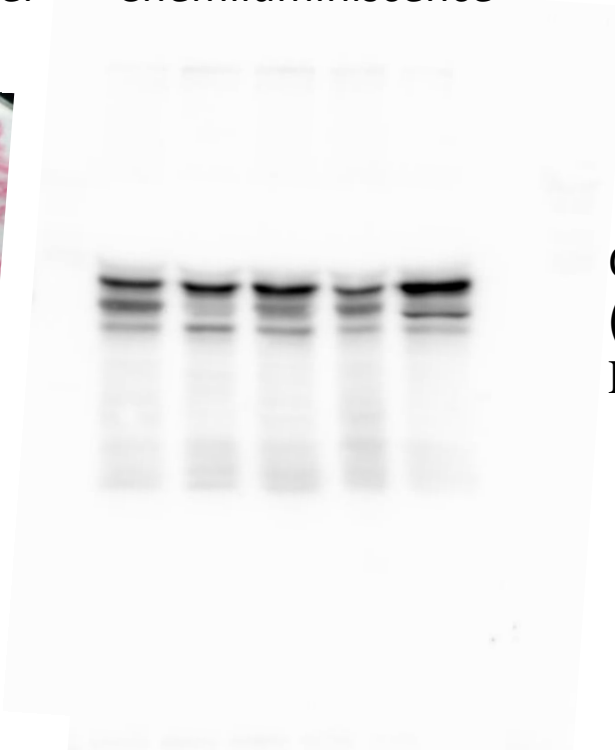

Caspase-1 and GAPDH included in Main figure 2C analysis

Cleaved Caspase-1 (52 kDa) (AF6215; R&D Systems)

DMSO S1 NP PIC FLAG

245 kDa  
180 kDa  
135 kDa  
100 kDa  
75 kDa  
63 kDa  
48 kDa  
35 kDa  
25 kDa  
20 kDa  
17 kDa  
11 kDa

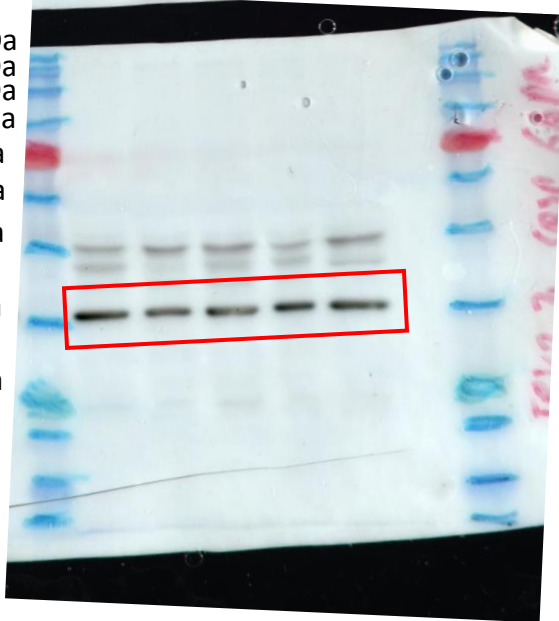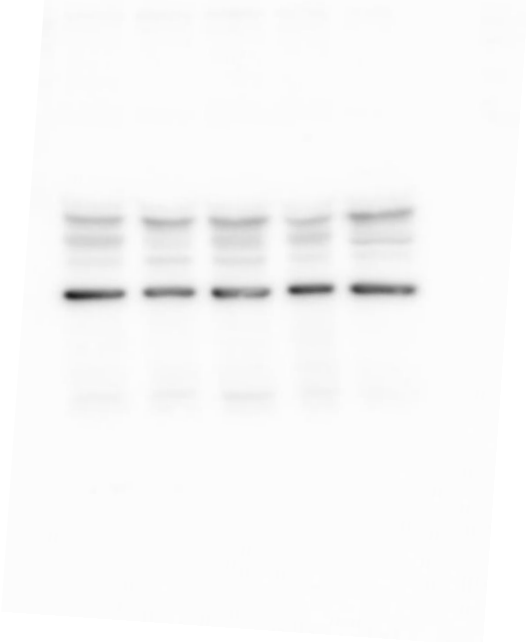

GAPDH (35 kDa) (FF26A/F9 BioLegend)

### Chemiluminescence+Marker

DMSO S1 NP PIC FLAG

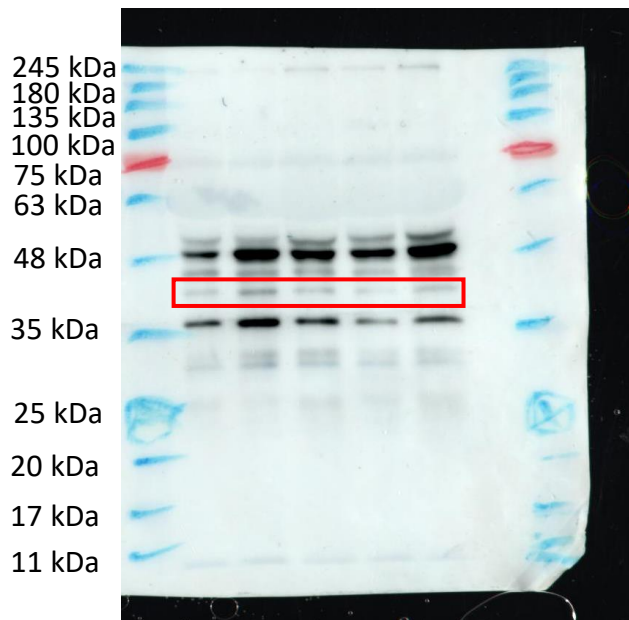

DMSO S1 NP PIC FLAG

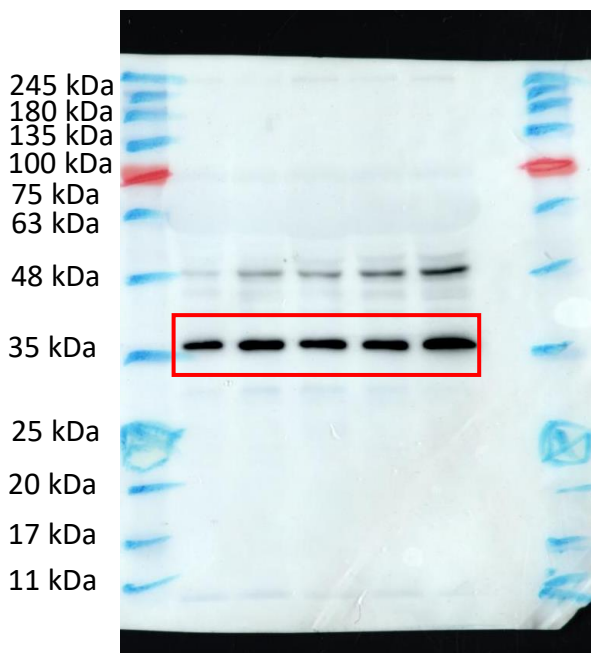

### Chemiluminescence

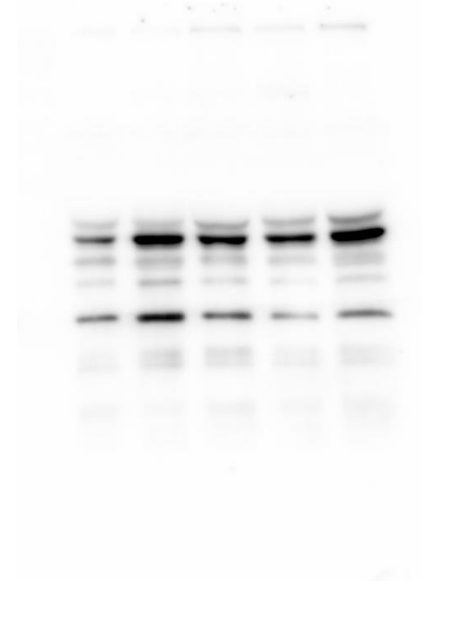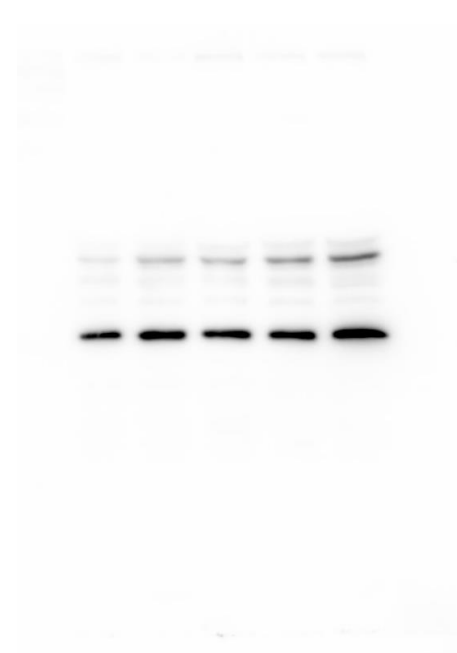

Caspase-1 and GAPDH included in Main figure 2C analysis

Cleaved Caspase-1 (52 kDa) (AF6215; R&D Systems)

GAPDH (35 kDa) (FF26A/F9 BioLegend)

### Chemiluminescence+Marker

DMSO S1 NP PIC FLAG

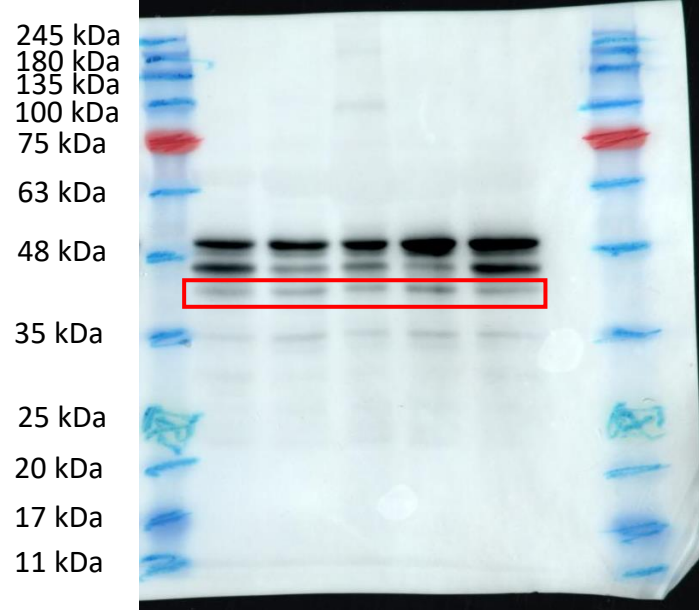

DMSO S1 NP PIC FLAG

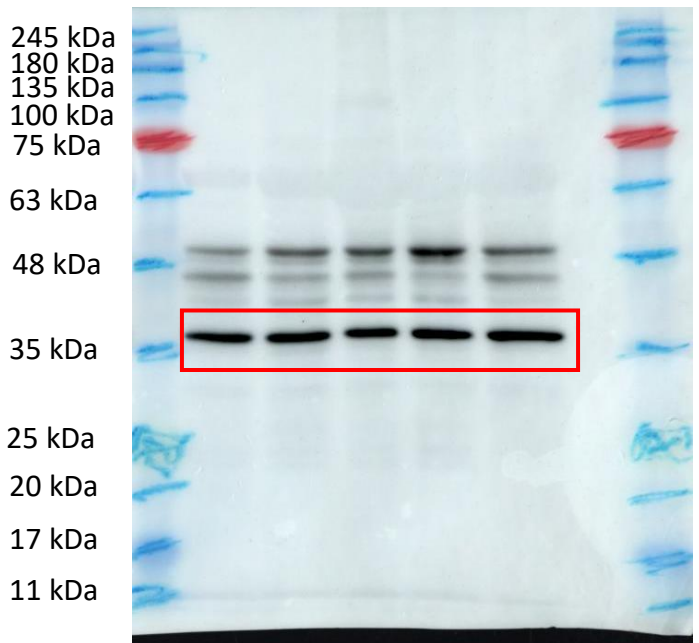

### Chemiluminescence

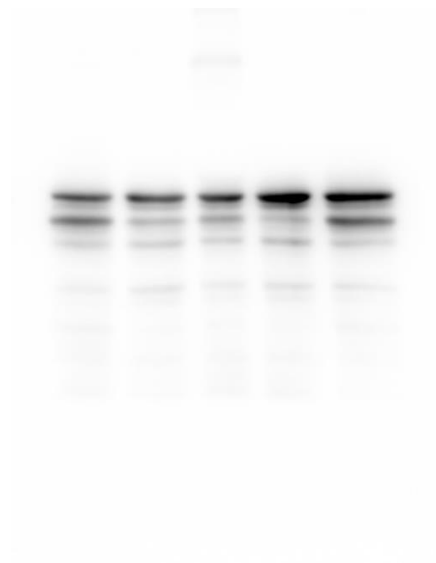

Cleaved Caspase-1  
(52 kDa) (AF6215;  
R&D Systems)

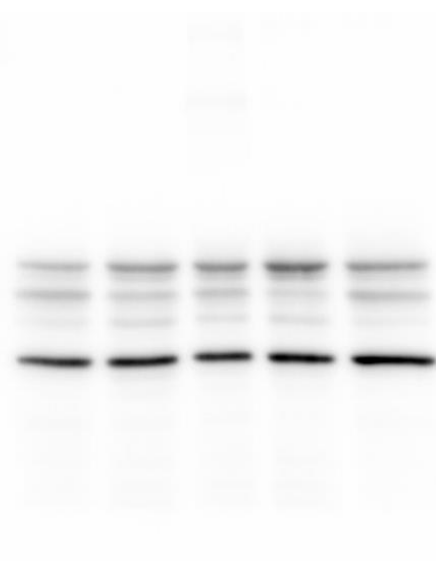

GAPDH (35 kDa)  
(FF26A/F9 BioLegend)

Caspase-1 and GAPDH included in  
Main figure 2C analysis



# Chemiluminescence+Marker

DMSO S1 NP PIC FLAG DMSO S1 NP PIC FLAG

245 kDa  
180 kDa  
135 kDa  
100 kDa  
75 kDa  
63 kDa  
48 kDa  
35 kDa  
25 kDa  
20 kDa  
17 kDa

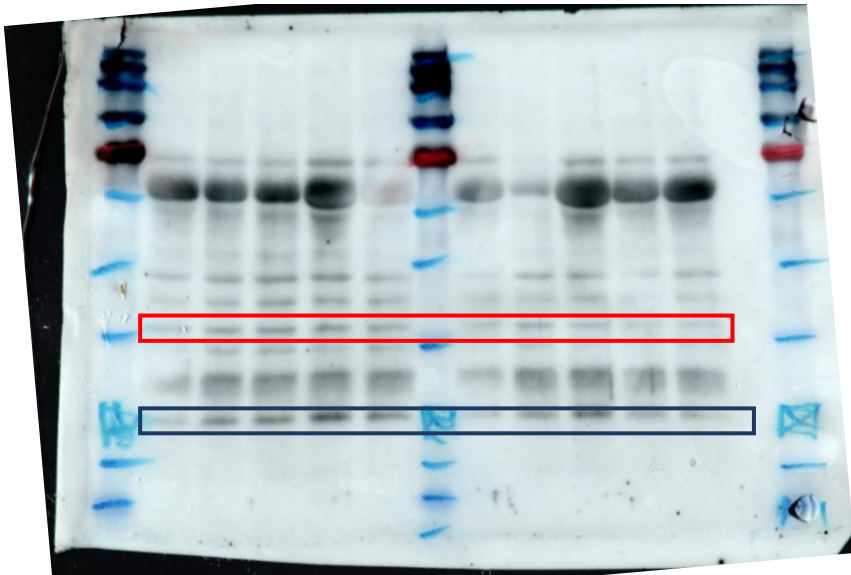

# Chemiluminescence

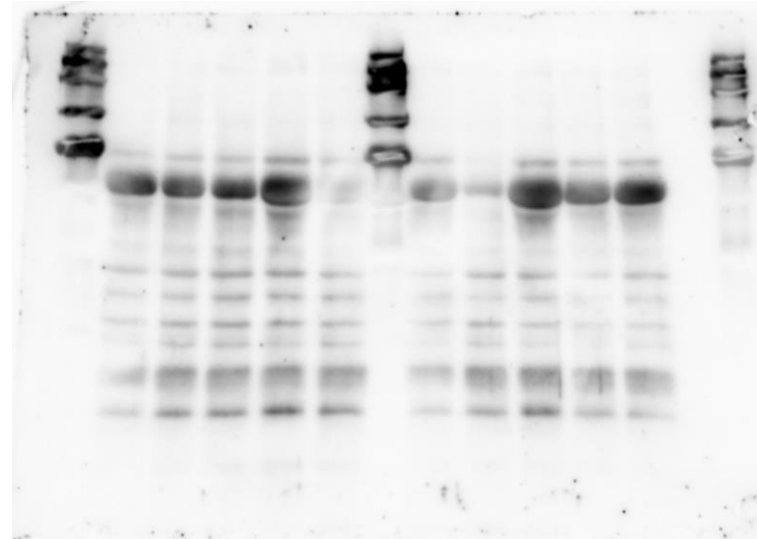

IL-1 $\beta$  and GAPDH included in Supplemental figure 2C analysis

IL-1 $\beta$  (31 kDa) (3A6, Cell Signaling)

Processed IL-1 $\beta$  (17 kDa) (3A6, Cell Signaling)

DMSO S1 NP PIC FLAG DMSO S1 NP PIC FLAG

245 kDa  
180 kDa  
135 kDa  
100 kDa  
75 kDa  
63 kDa  
48 kDa  
35 kDa  
25 kDa  
20 kDa  
17 kDa

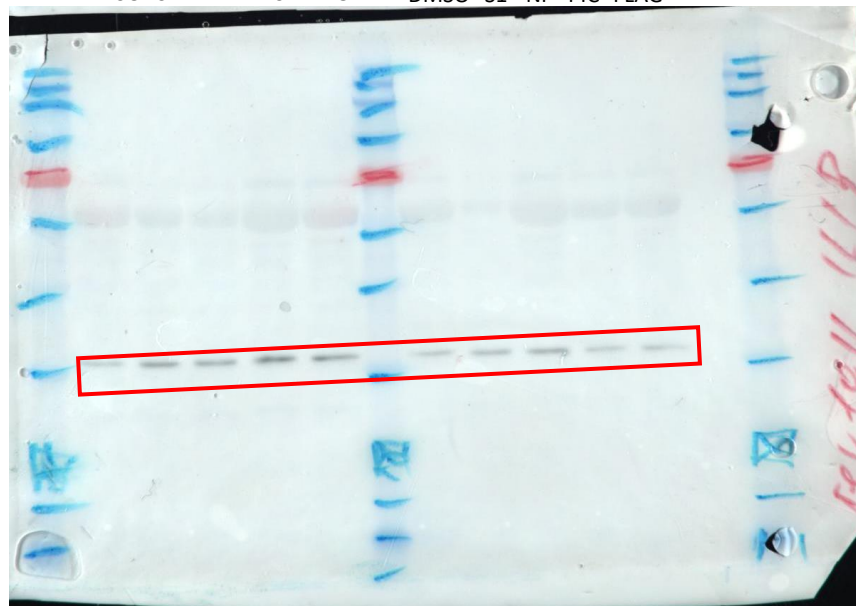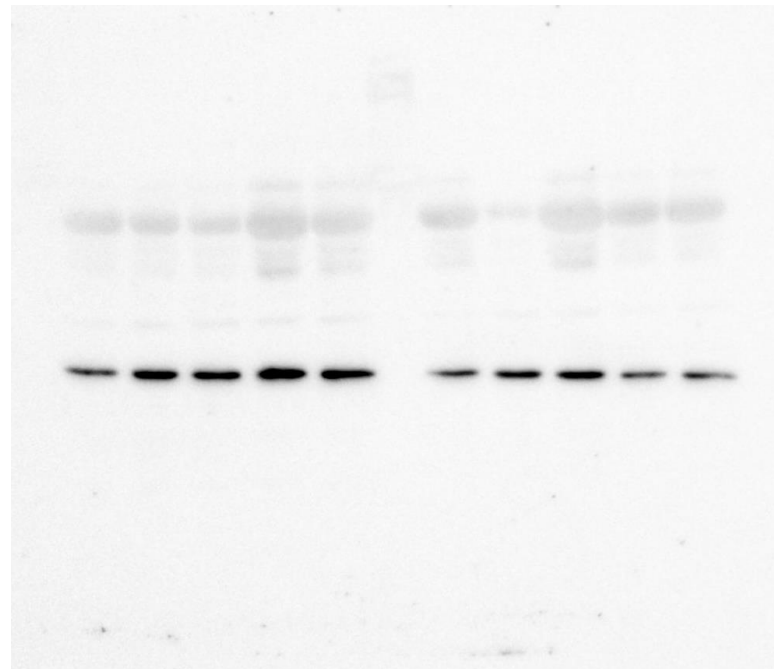

GAPDH (35 kDa) (FF26A/F9 BioLegend)

### Chemiluminescence+Marker

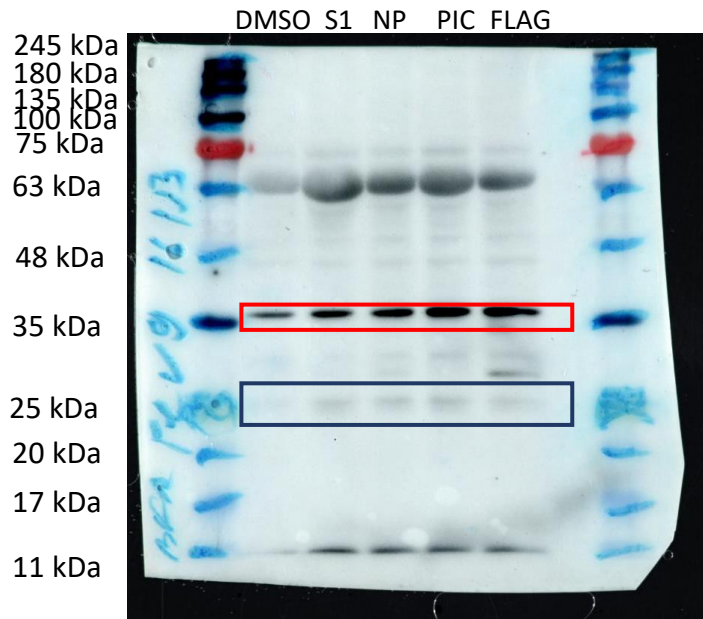

### Chemiluminescence

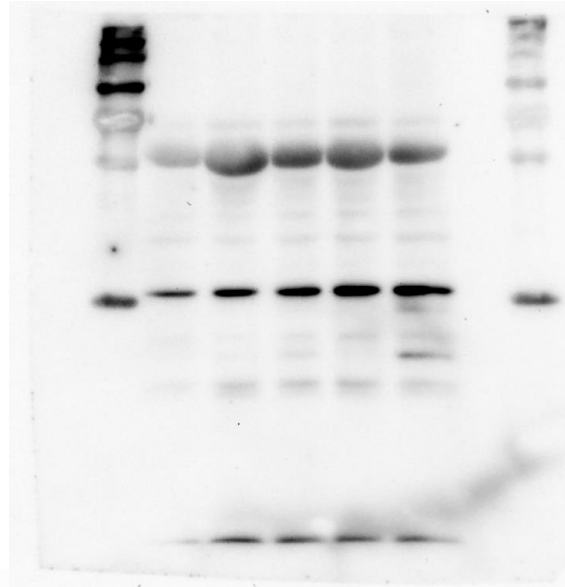

IL-1 $\beta$  (31 kDa) (3A6, Cell Signaling)

Processed IL-1 $\beta$  (17 kDa) (3A6, Cell Signaling)

DMSO S1 NP PIC FLAG

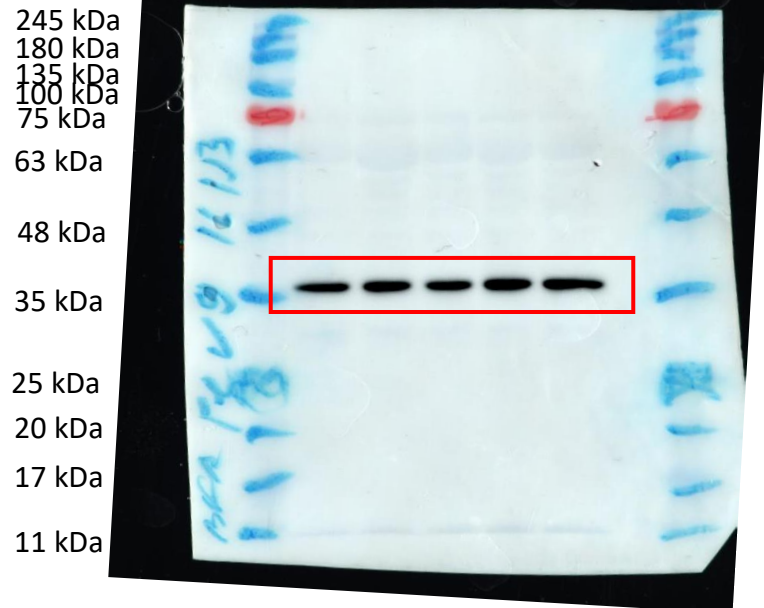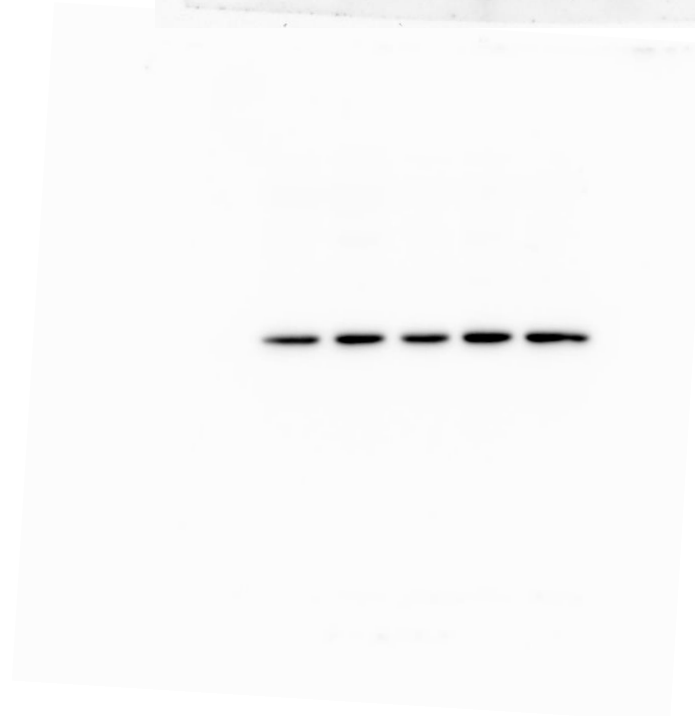

GAPDH (35 kDa)  
(FF26A/F9 BioLegend)

IL-1 $\beta$  and GAPDH included in Supplemental figure 2C analysis

### Chemiluminescence+Marker

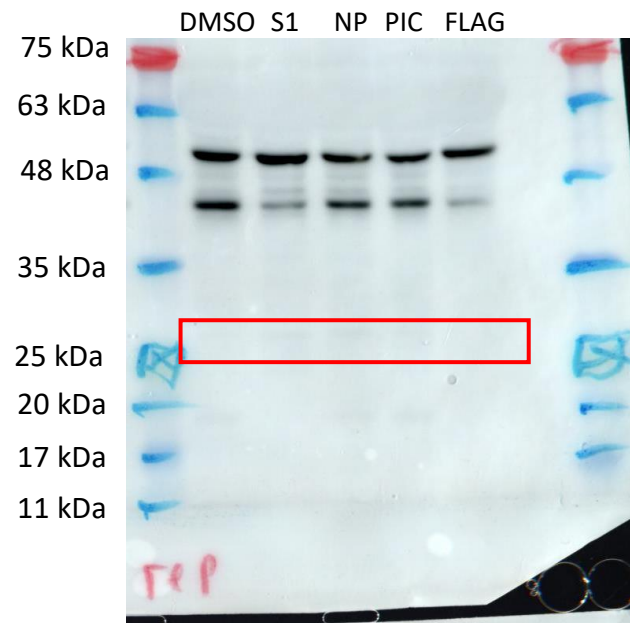

### Chemiluminescence

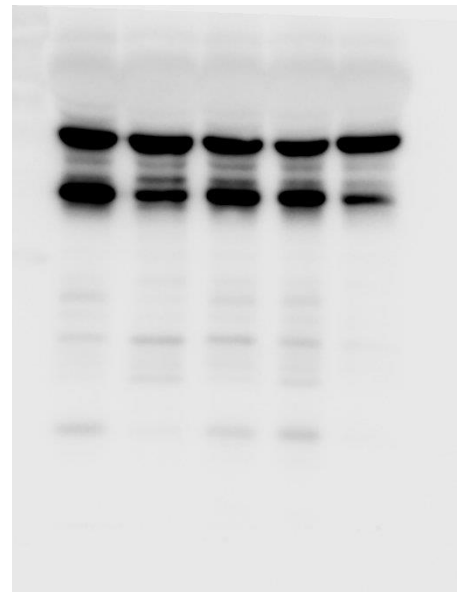

Cleaved Gasdermin D (21 kDa)  
(E5O4N, Cell Signaling)

Gasdermin D and GAPDH  
included in Supplemental figure  
2C analysis

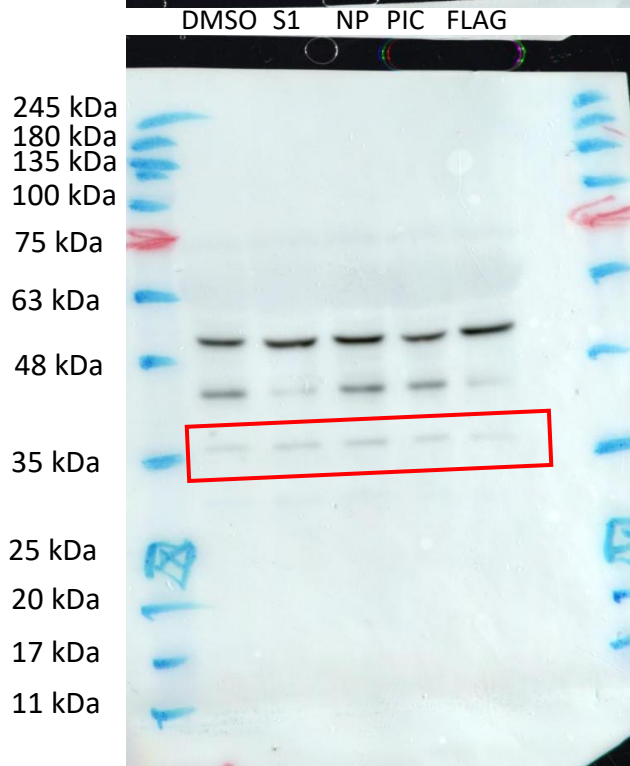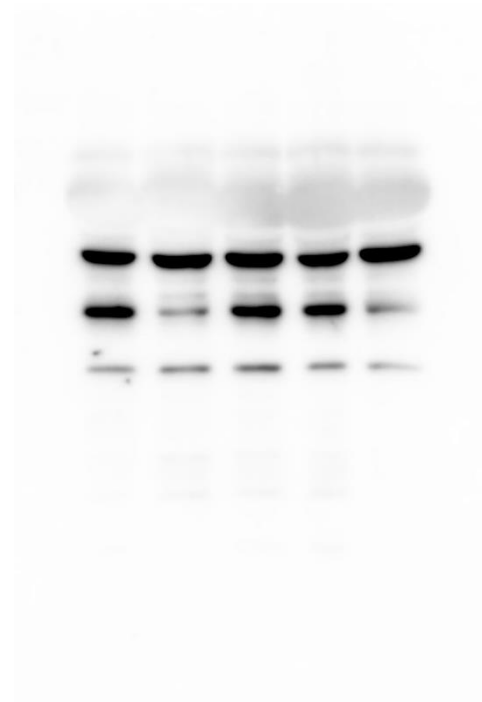

GAPDH (35 kDa) (FF26A/F9  
BioLegend)

# Chemiluminescence+Marker

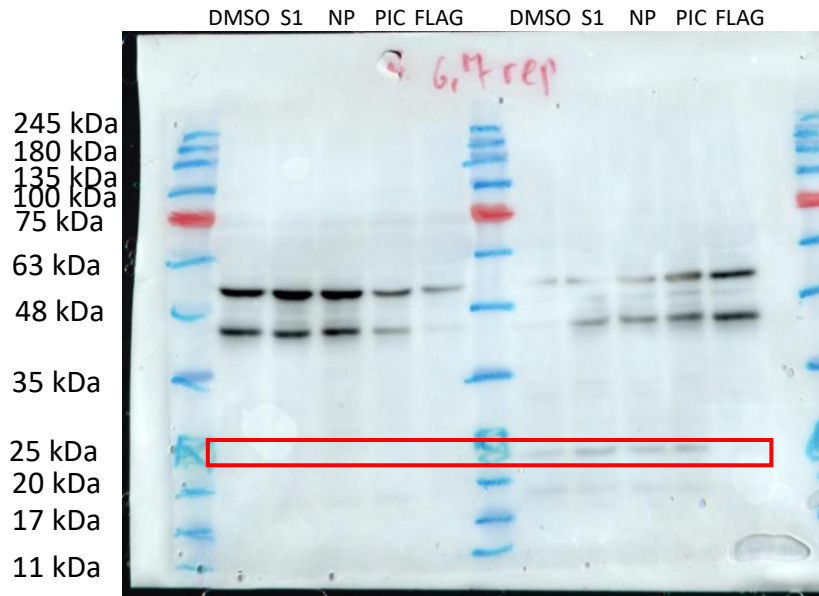

# Chemiluminescence

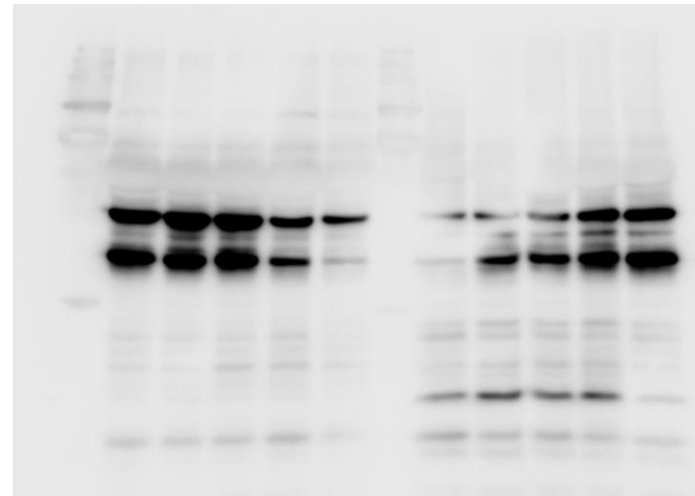

Gasdermin D and GAPDH included in Supplemental figure 2C analysis

Cleaved Gasdermin D (21 kDa)  
(E5O4N, Cell Signaling)

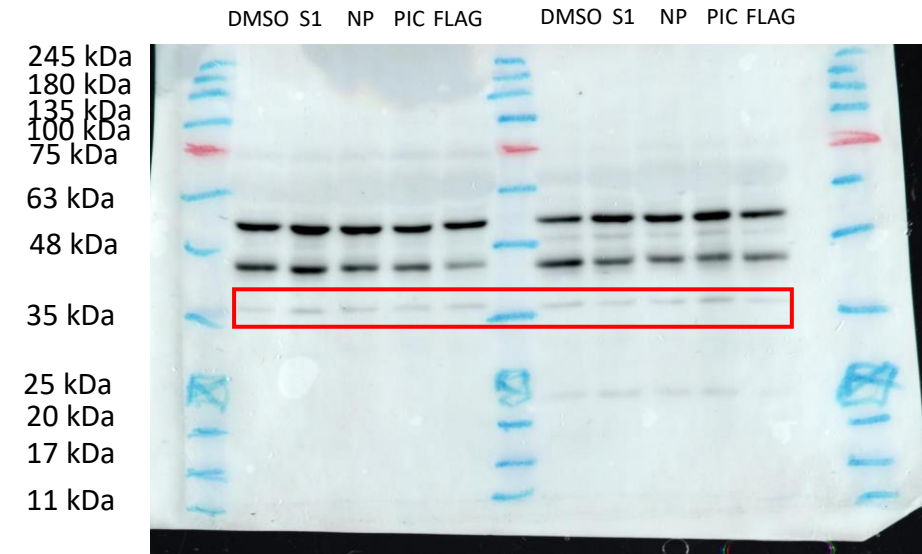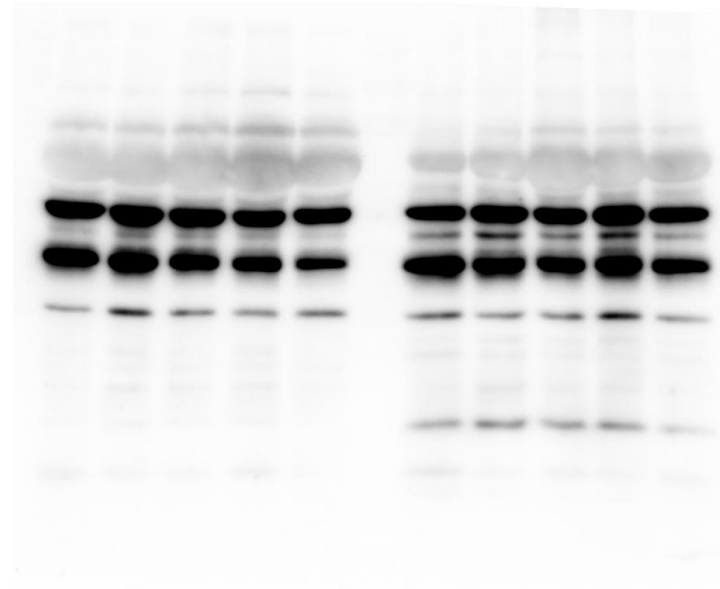

GAPDH (35 kDa) (FF26A/F9  
BioLegend)
